# Supplementary material for: Nickel-catalyzed cross-electrophile coupling of aryl chlorides with allylic alcohols
Source: Royal Society of Chemistry journal article supplement (doi:10.1039/d1ob01874d), 2021-01-01

Electronic Supplementary Information

## **Nickel-Catalyzed Cross-Electrophile Coupling of Aryl Chlorides with Allylic Alcohols**

Hang Yu and Zhong-Xia Wang

Copies of NMR spectra of the coupling products

(1) 1-cinnamyl-4-methylbenzene (**3aa**)

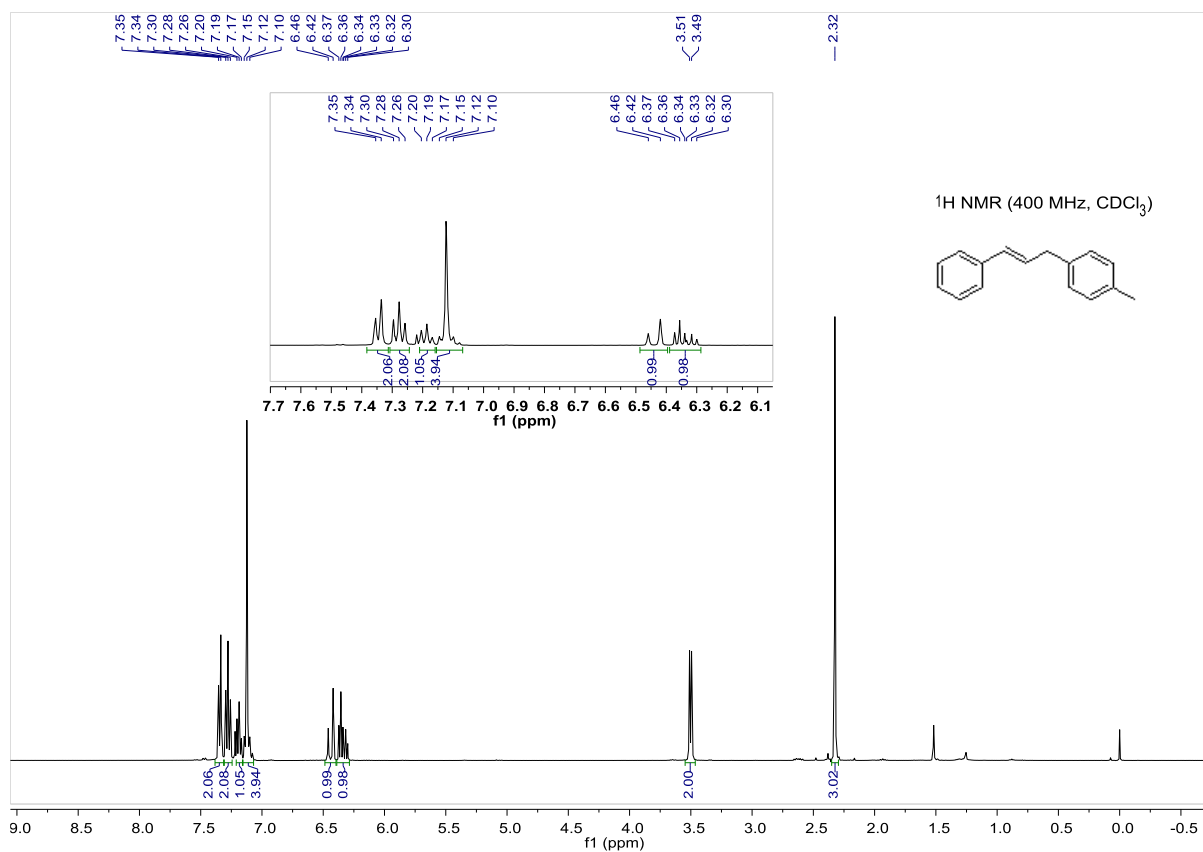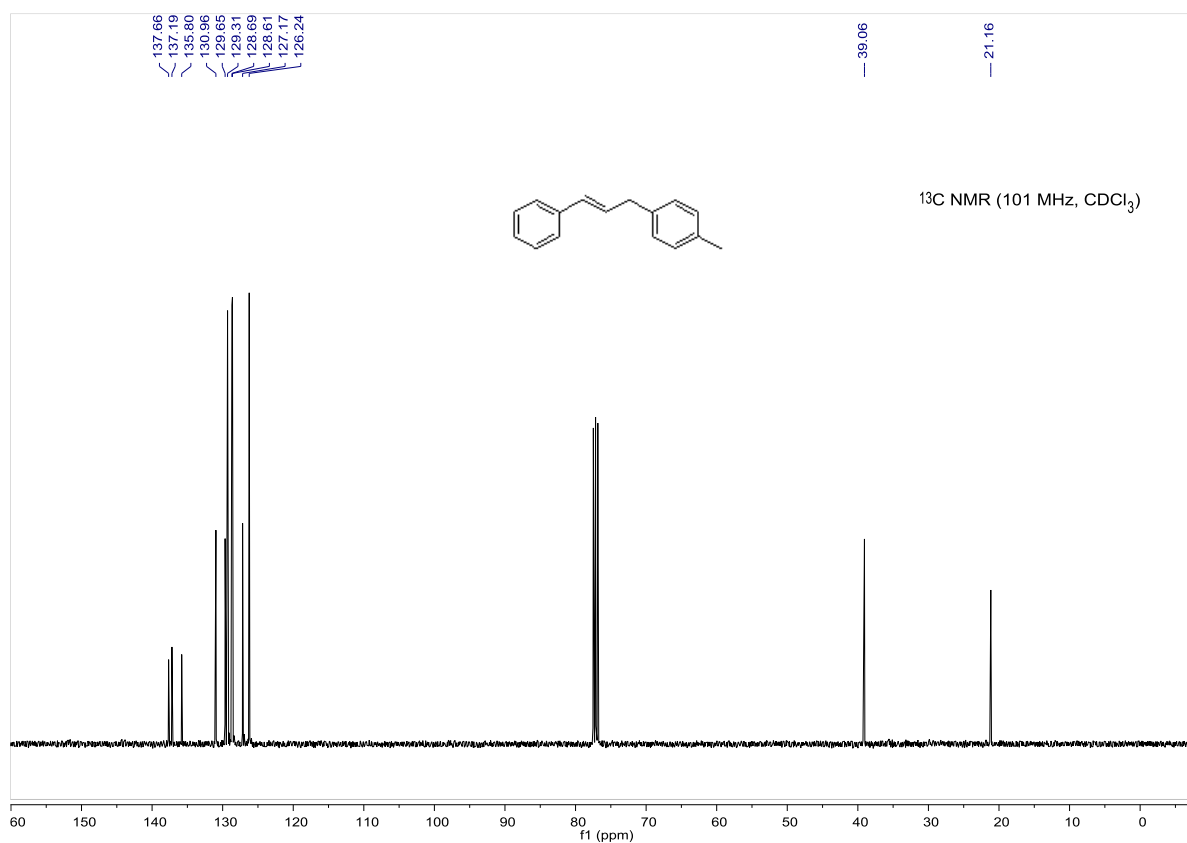

(2) (*E*)-prop-1-ene-1,3-diylidibenzene (**3ab**)

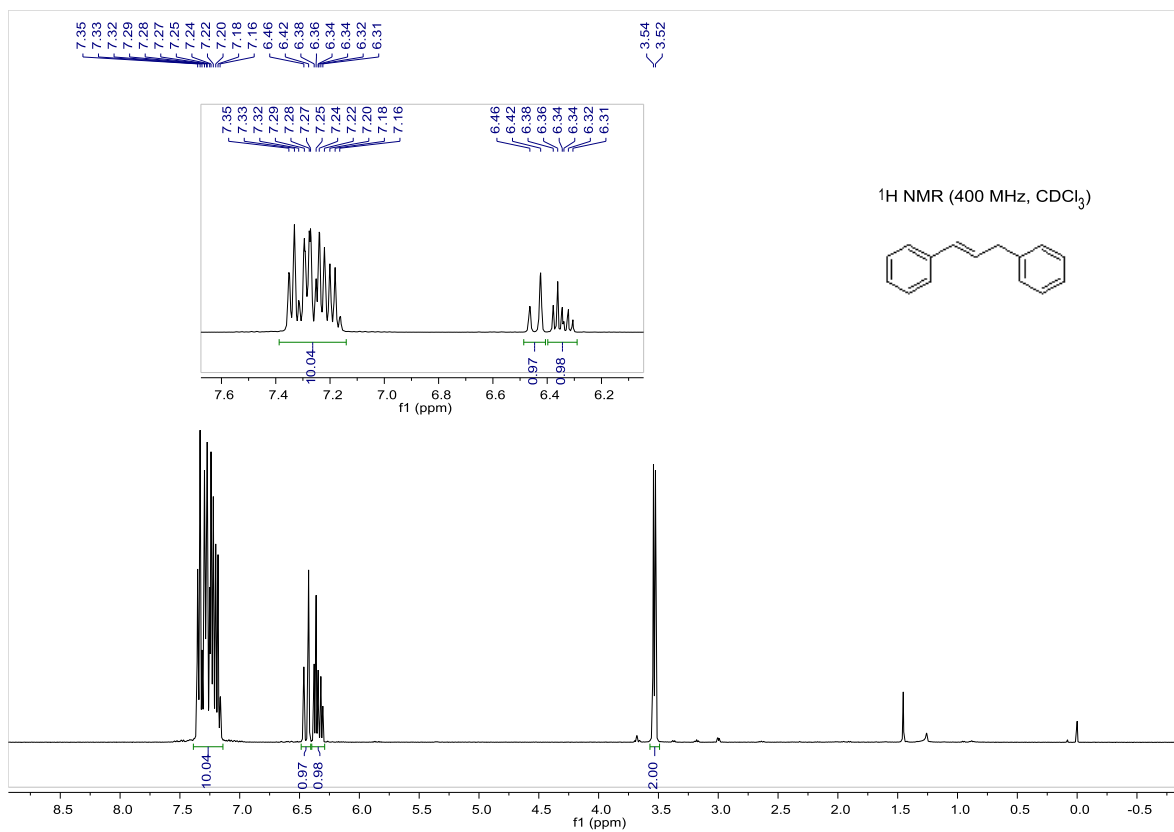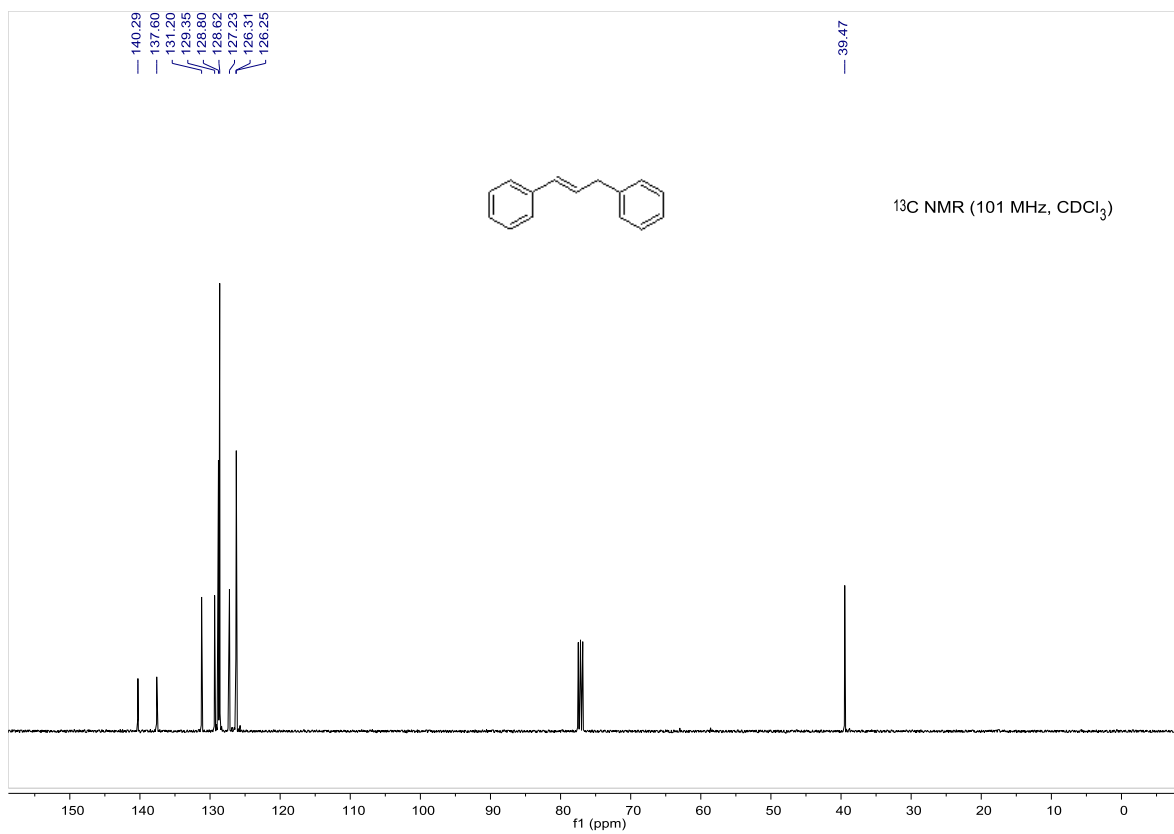

(3) 1-cinnamyl-4-ethylbenzene (**3ac**)

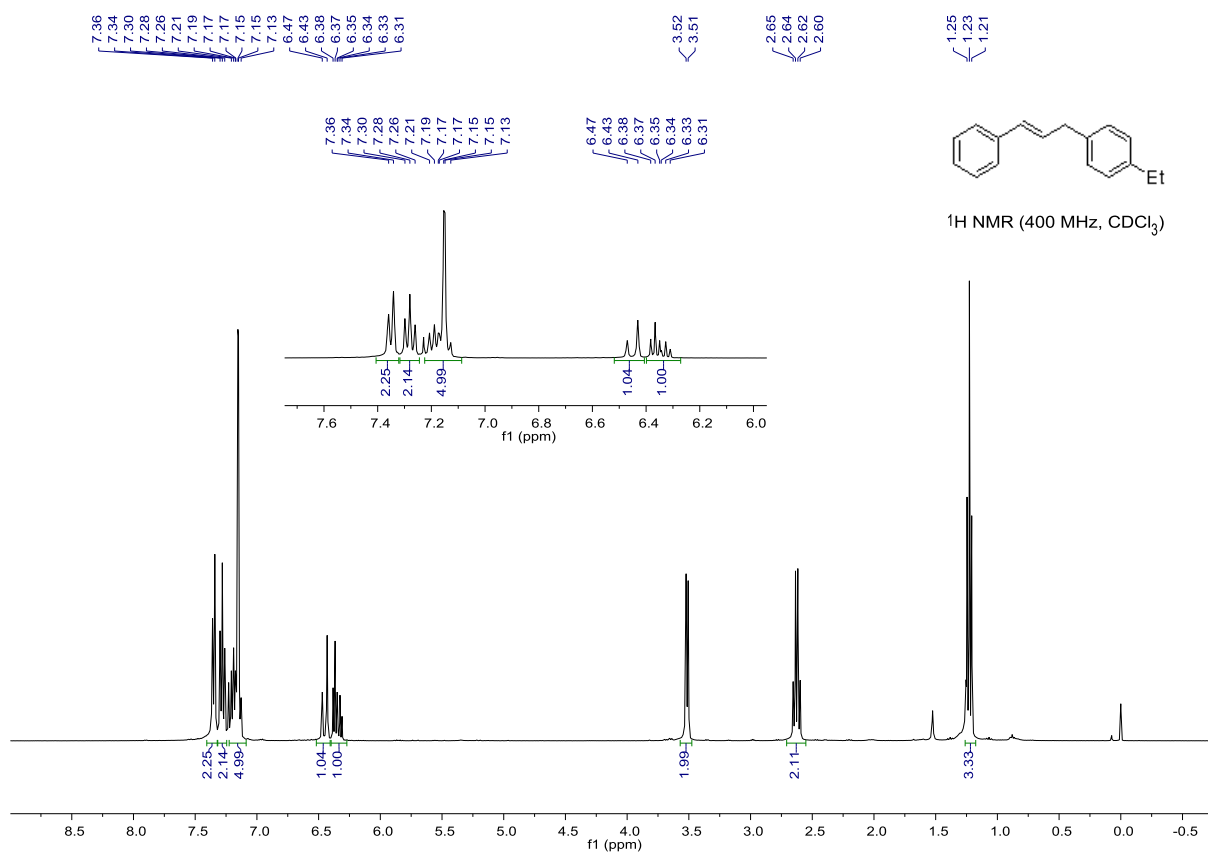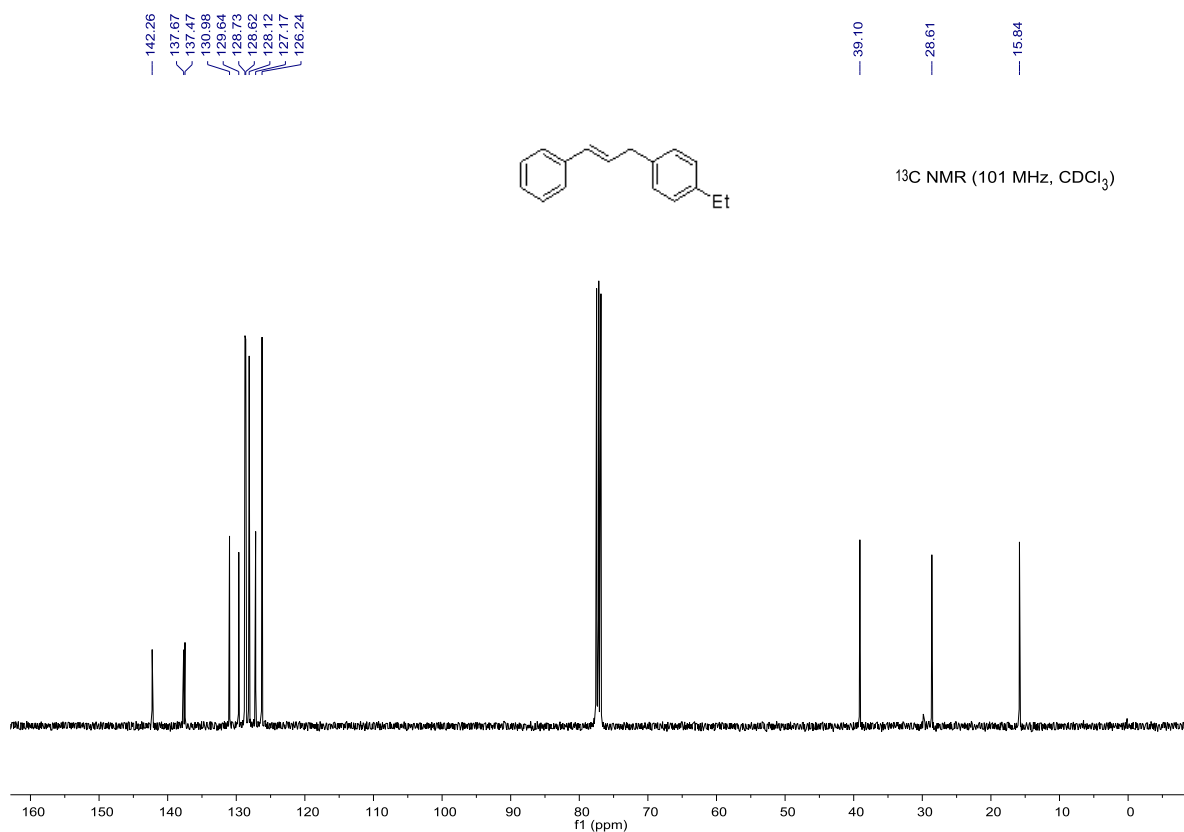

(4) 1-cinnamyl-4-methoxybenzene (**3ad**)

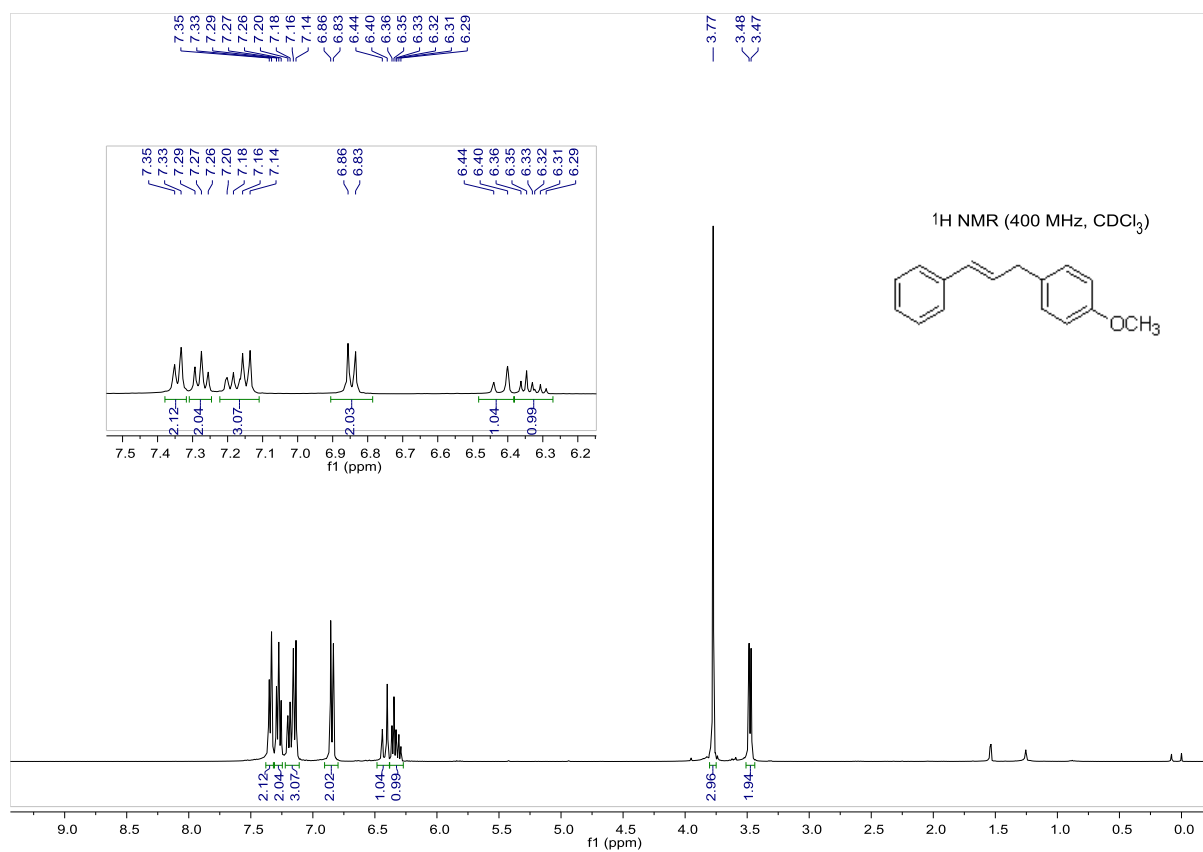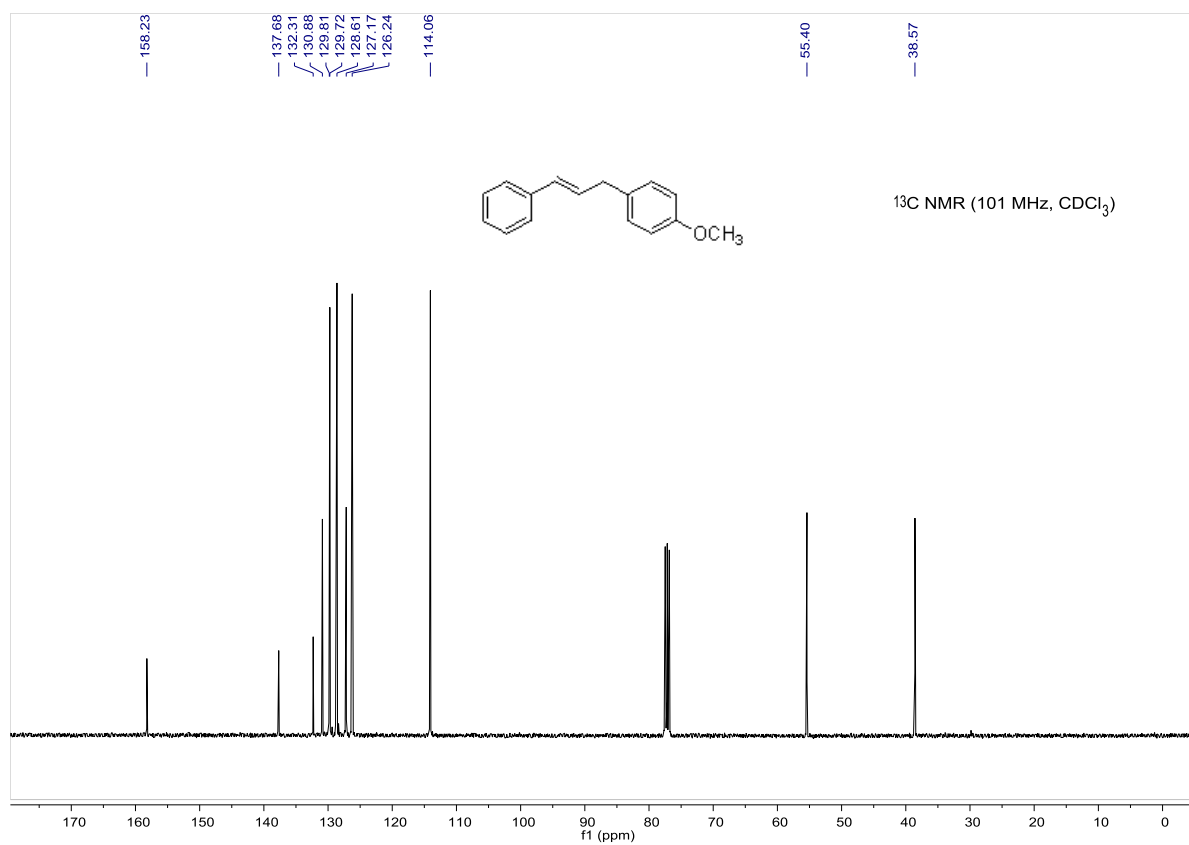

(5) (4-cinnamylphenyl)trimethylsilane (**3ae**)

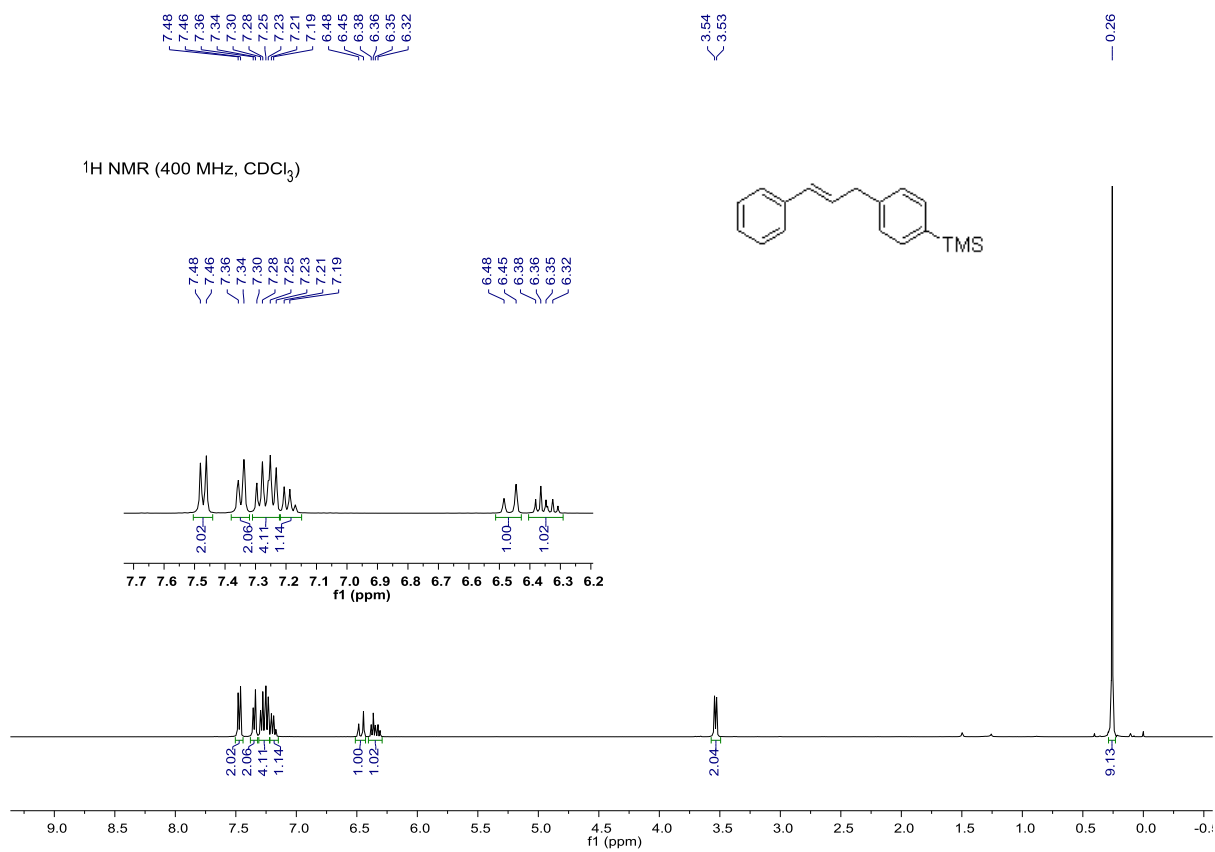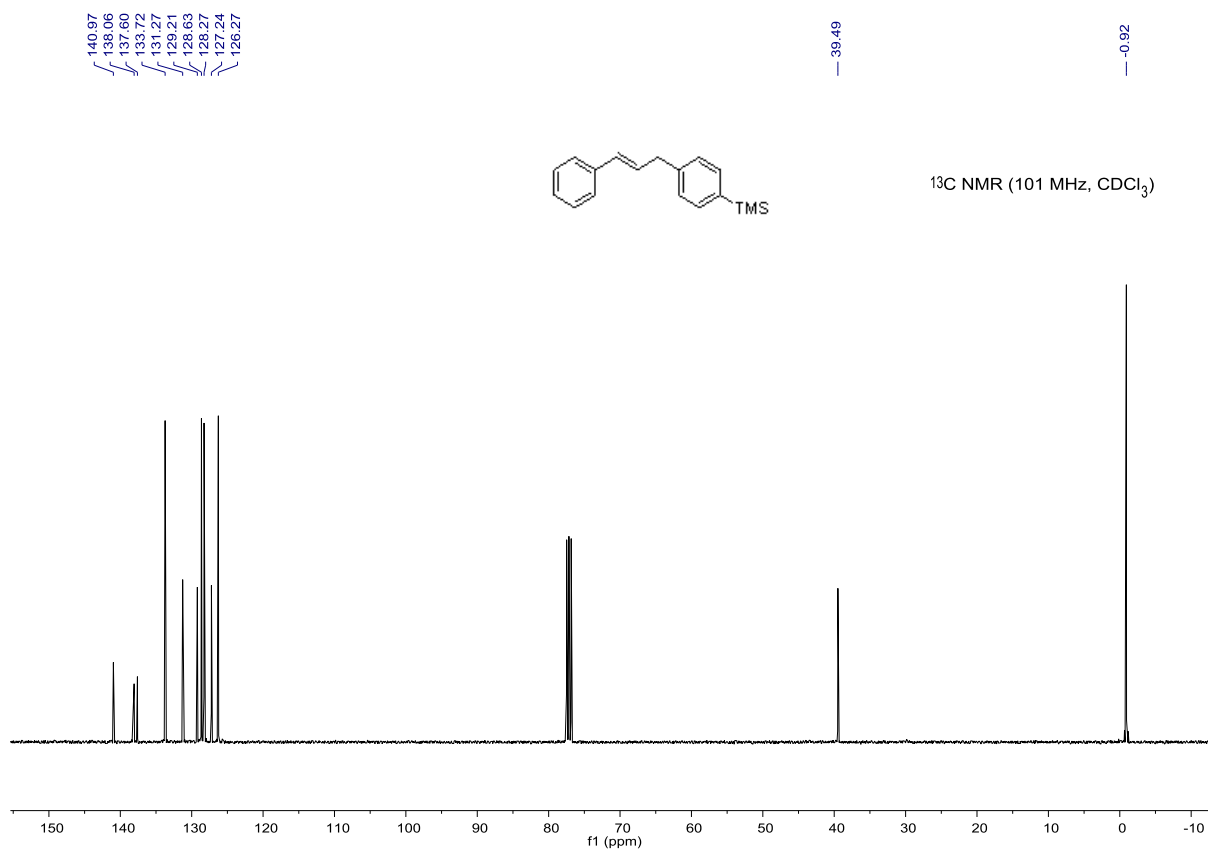

(6) 1-cinnamyl-3-methylbenzene (**3ag**)

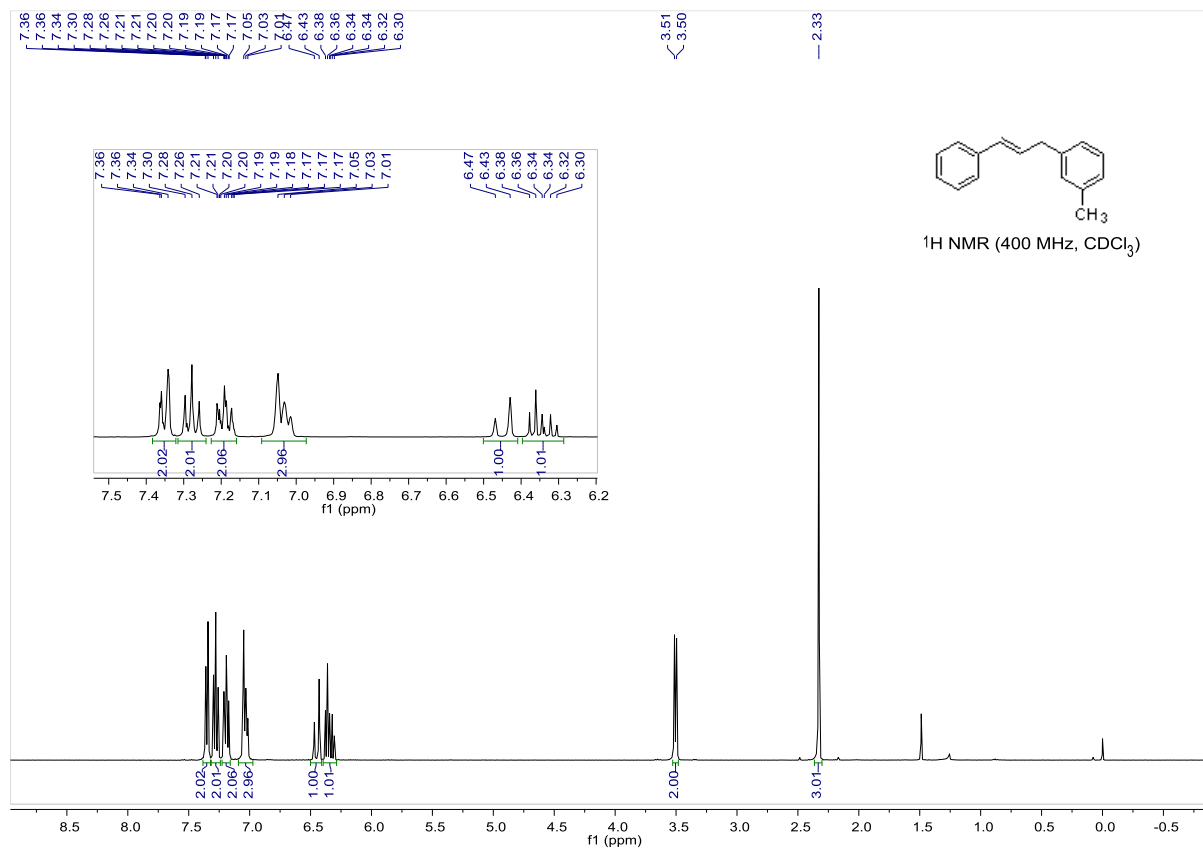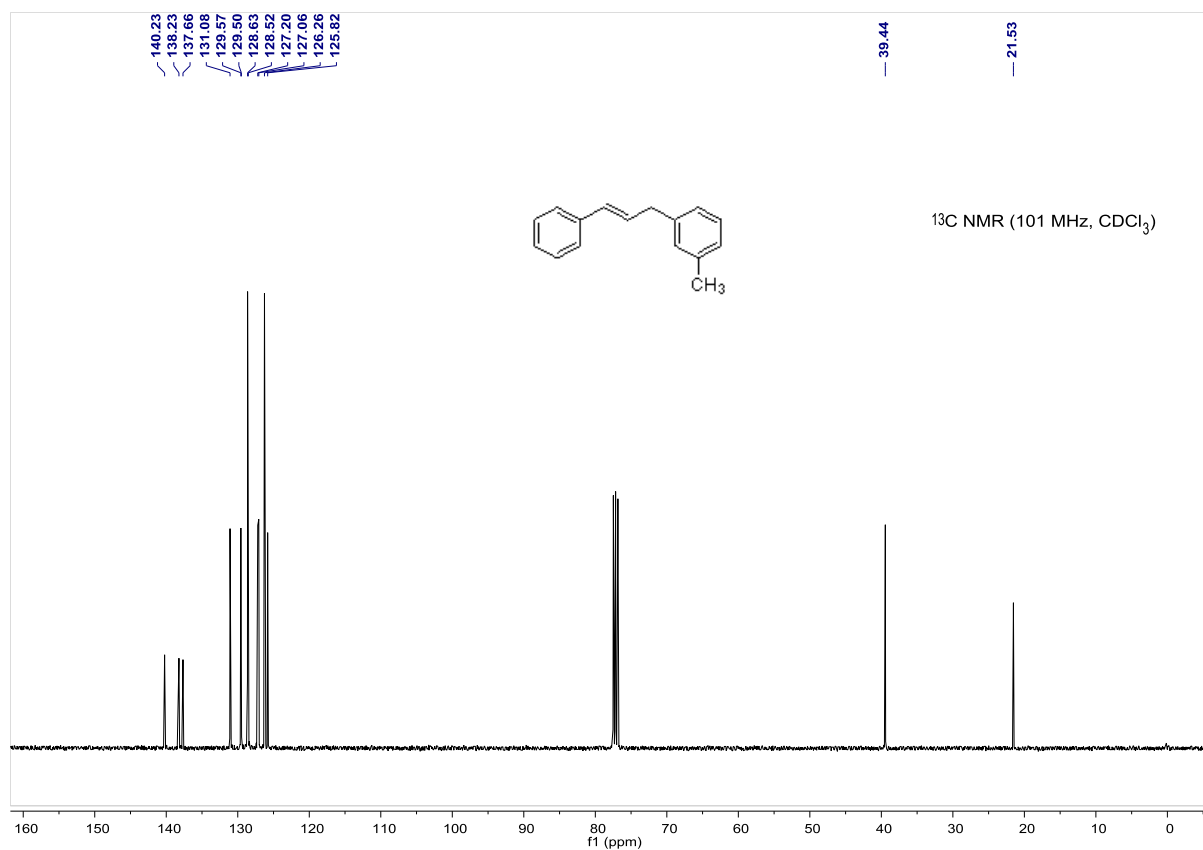

(7) 1-cinnamyl-3-methoxybenzene (**3ah**)

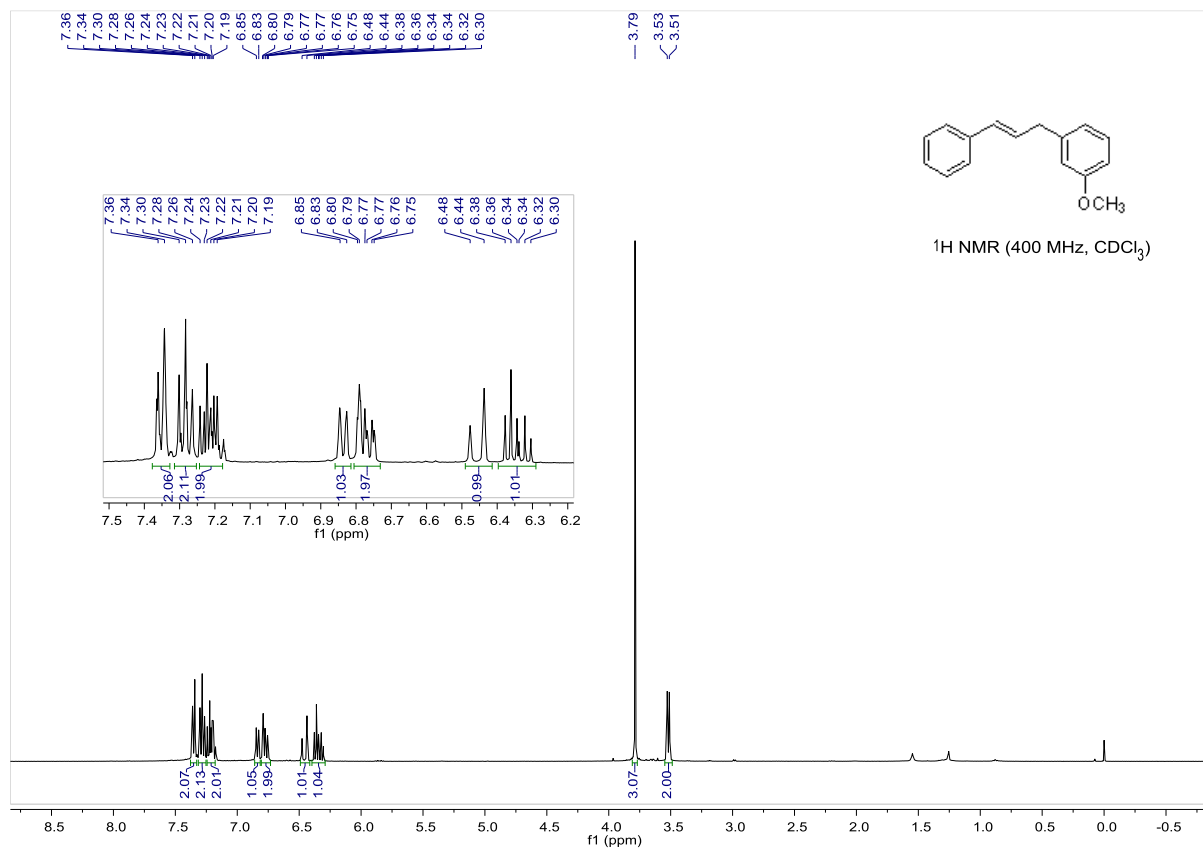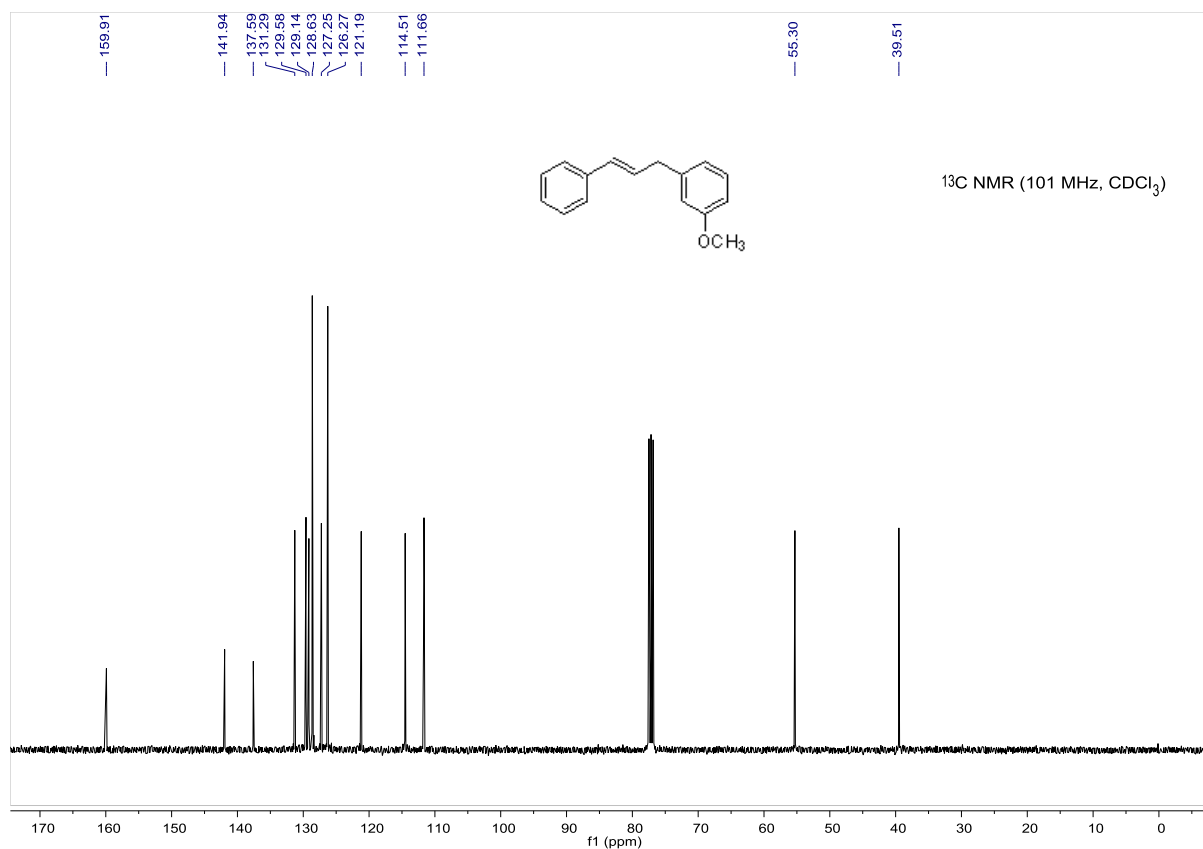



(8) 1-cinnamyl-2-methoxybenzene (**3ai**)

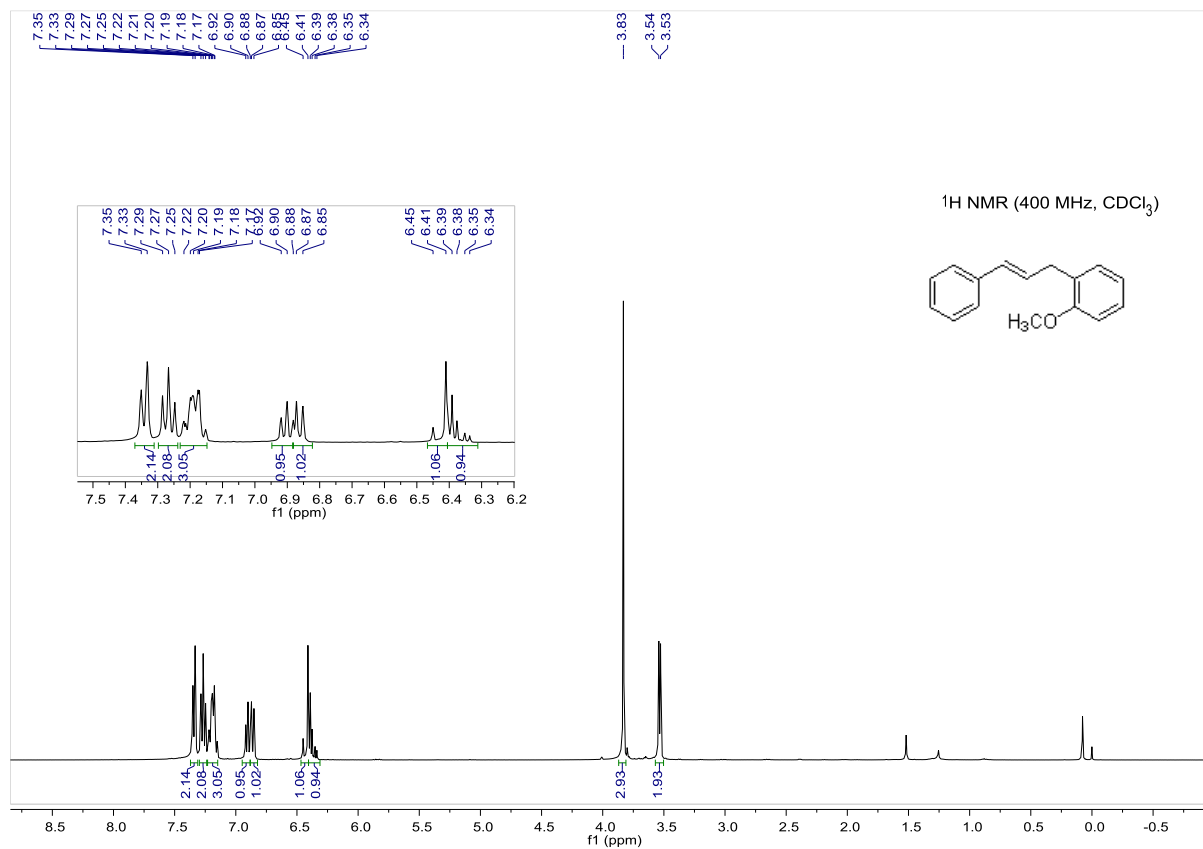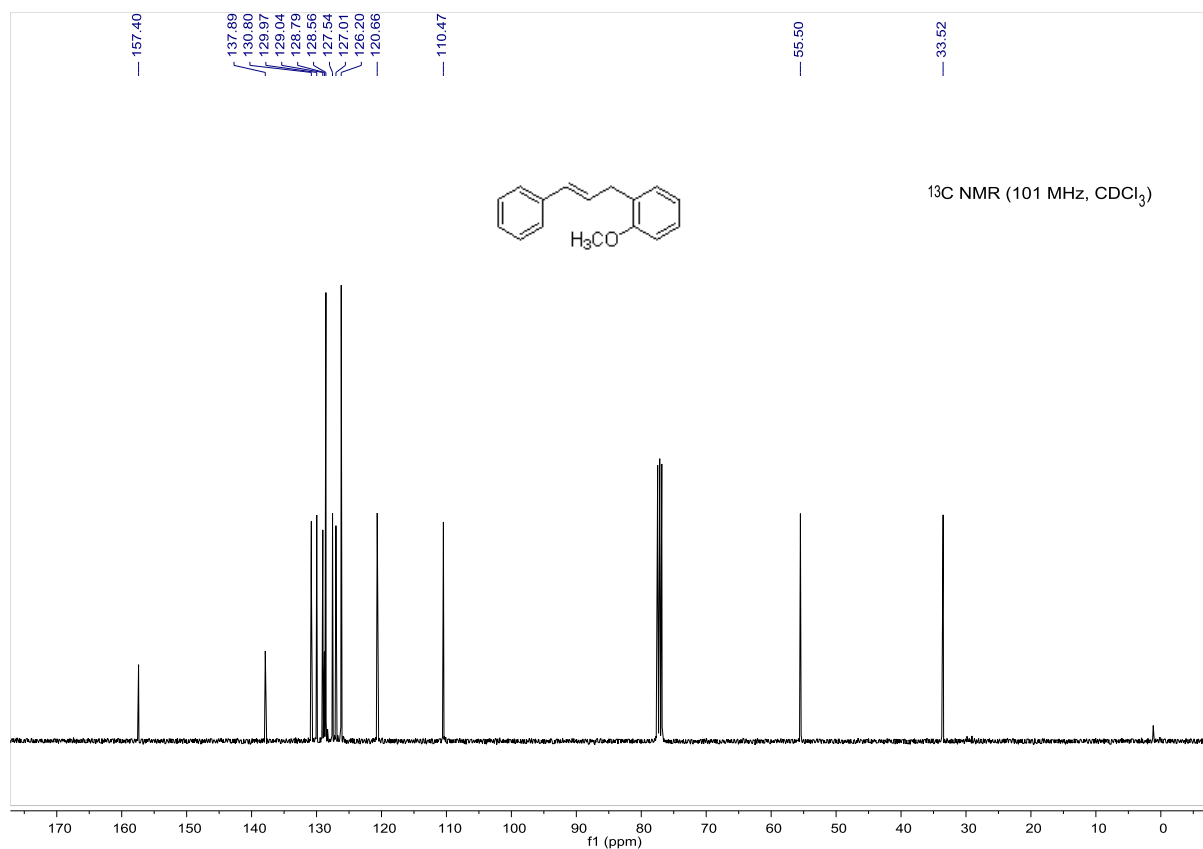

### (9) 4-cinnamyl-1,1'-biphenyl (3aj)

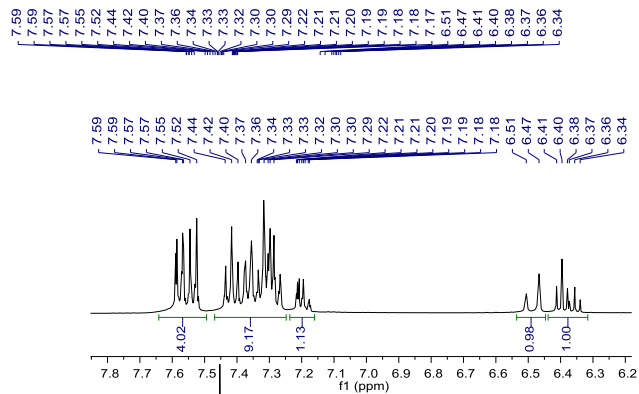

<sup>1</sup>H NMR (400 MHz, CDCl<sub>3</sub>)

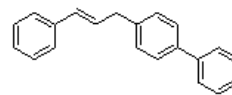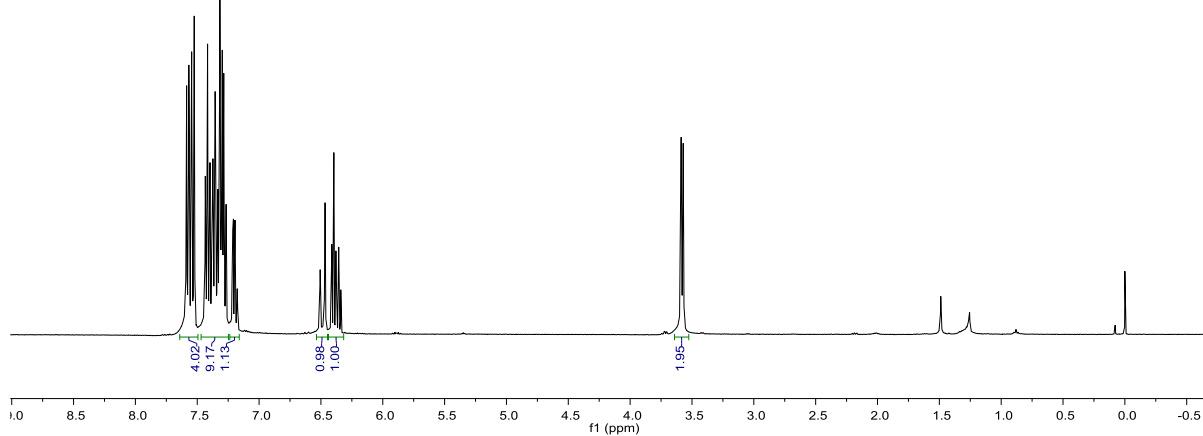

<sup>13</sup>C NMR (101 MHz, CDCl<sub>3</sub>)

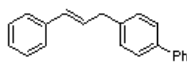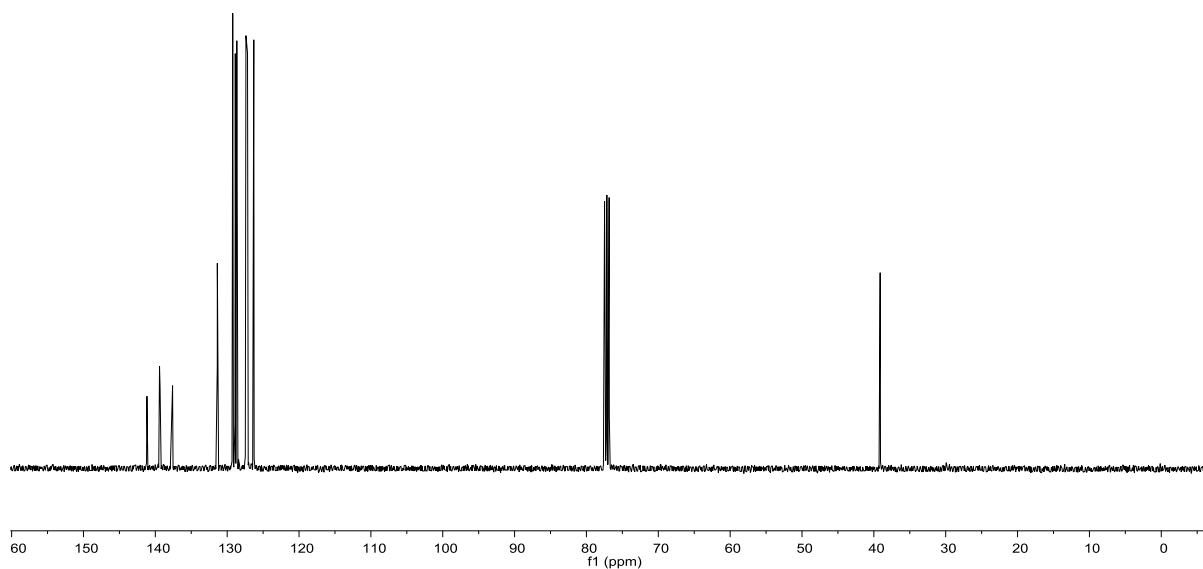

(10) 1-cinnamyl-2-vinylbenzene (**3al**)

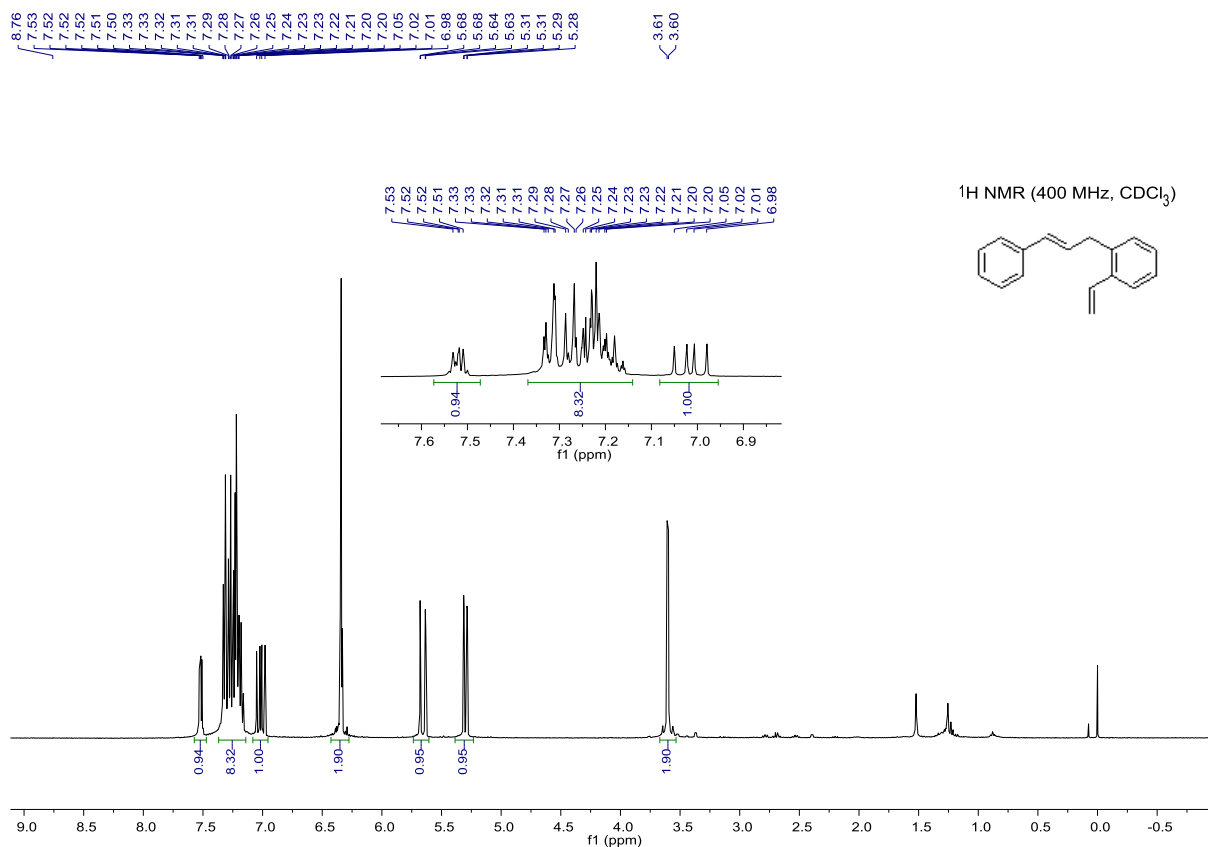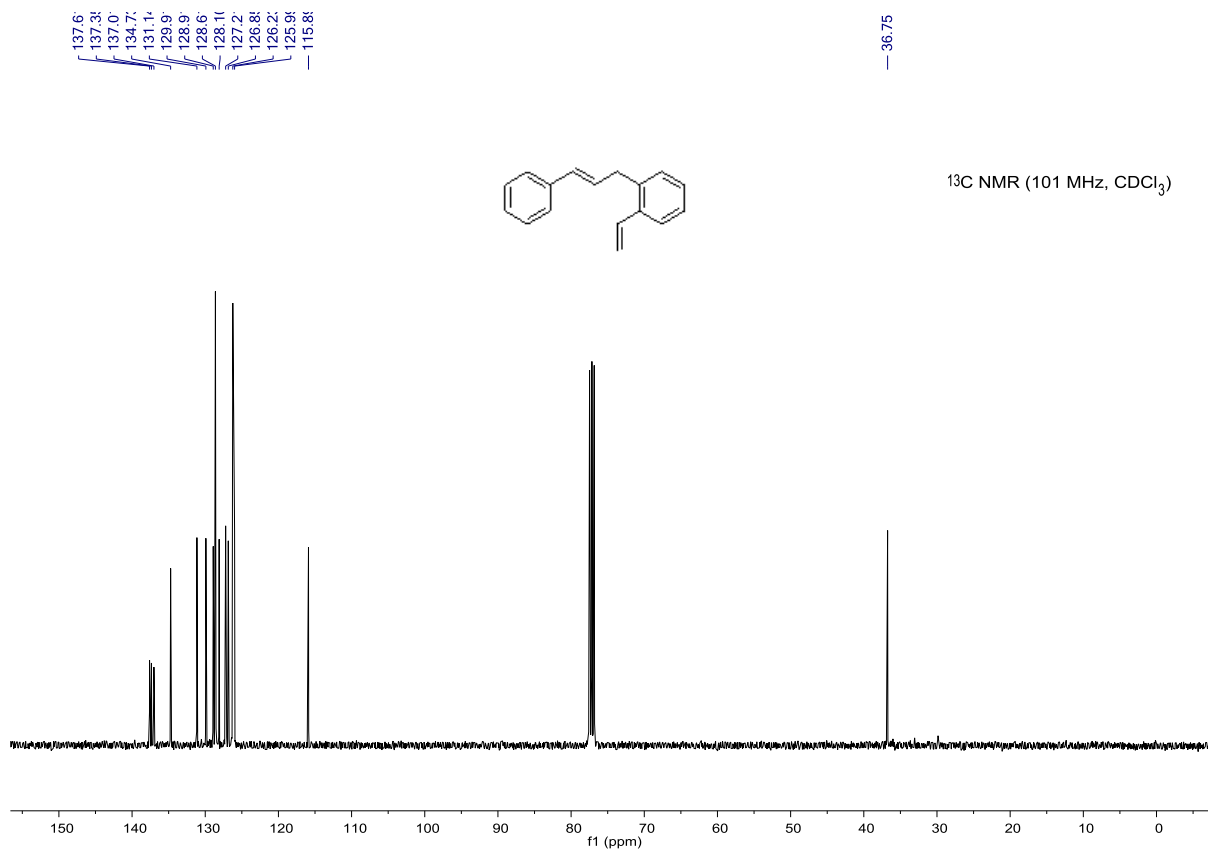

(11) 1-cinnamyl-4-fluorobenzene (**3am**)

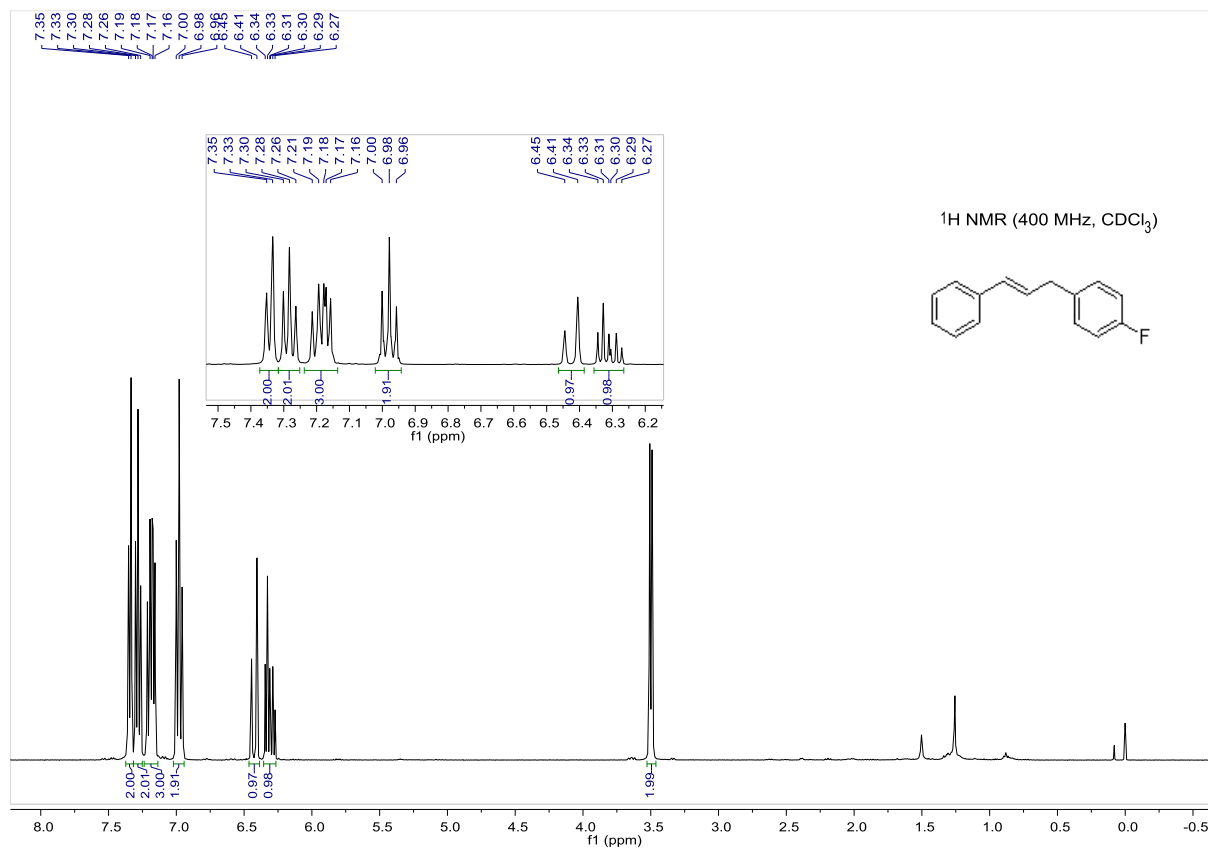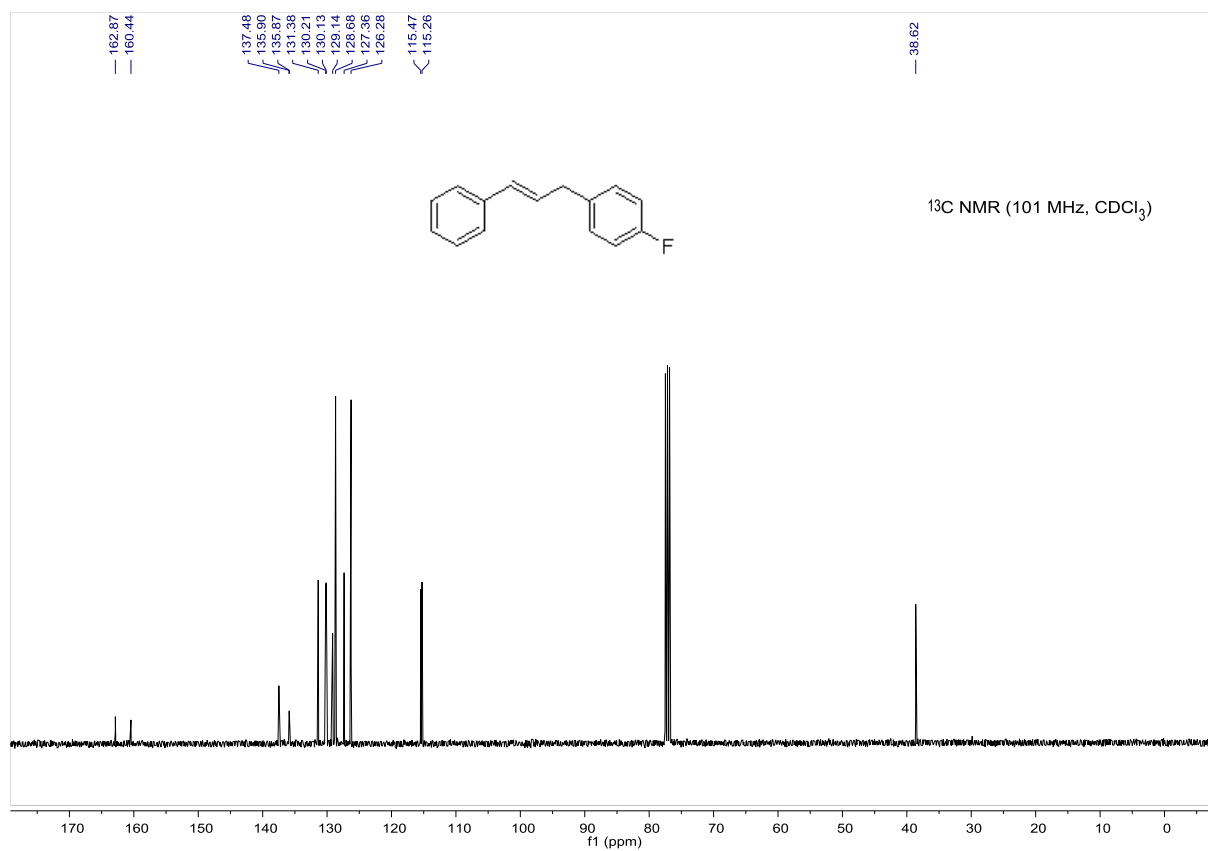

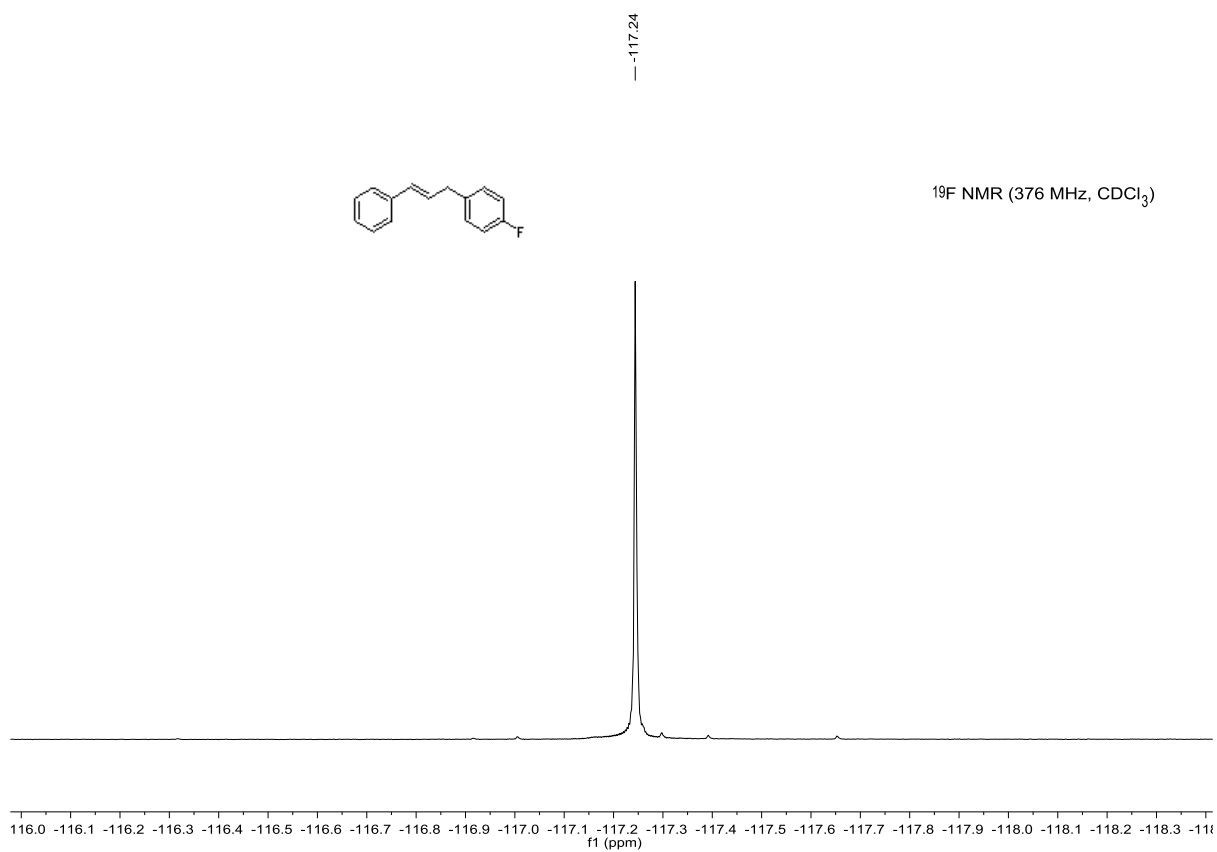

(12) 1-cinnamyl-3-fluorobenzene (**3an**)

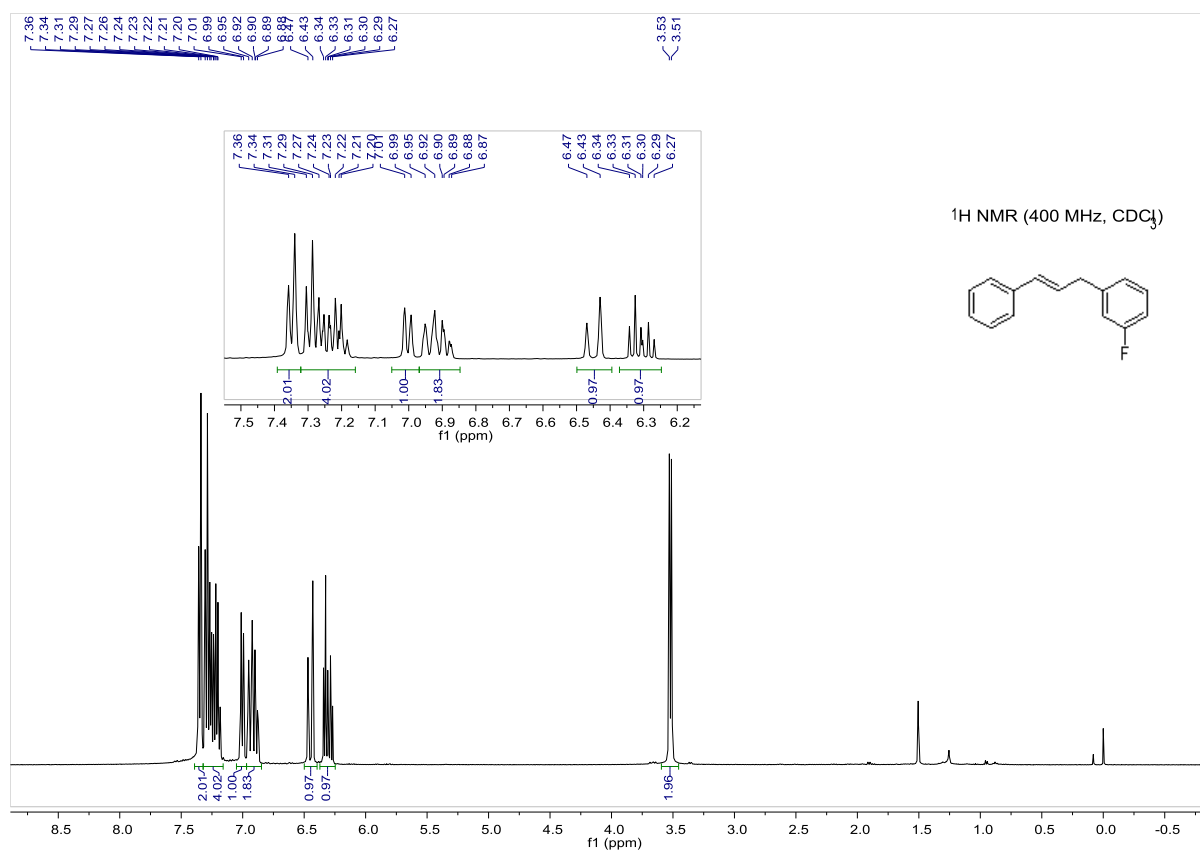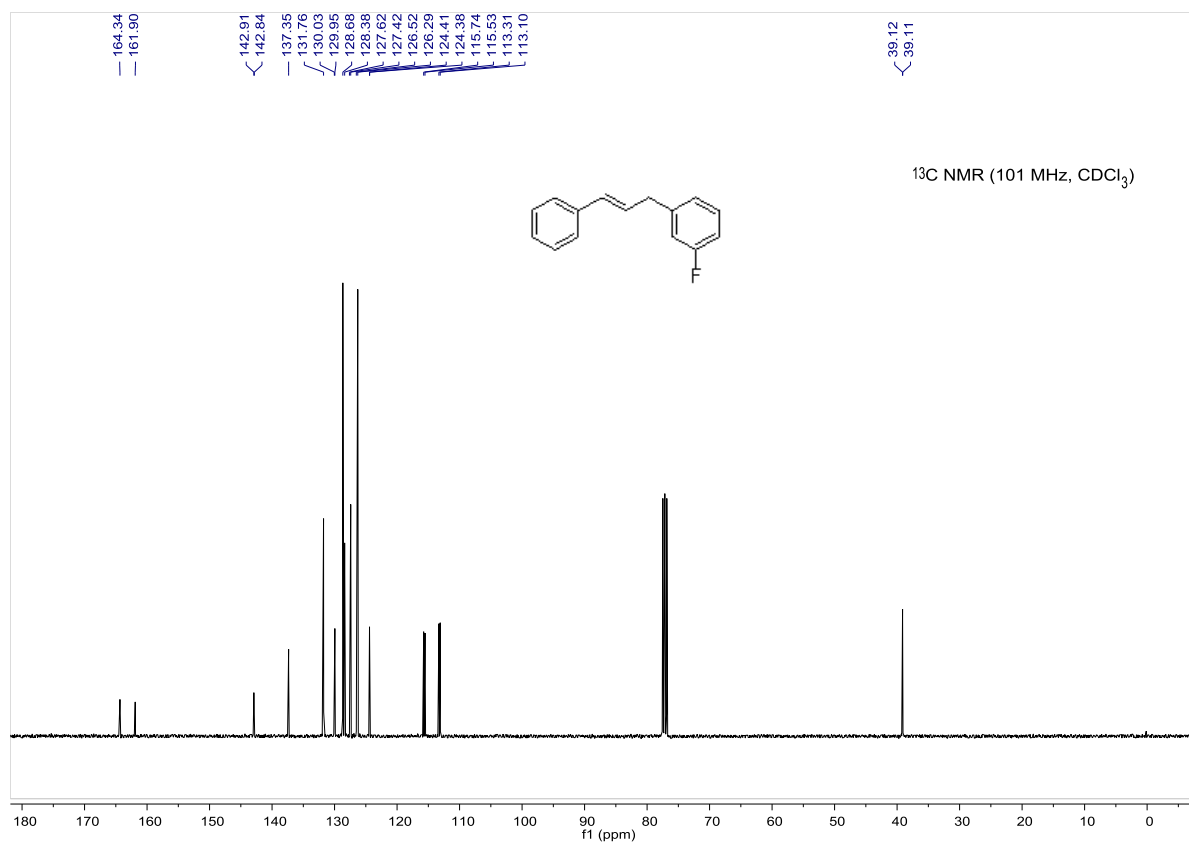

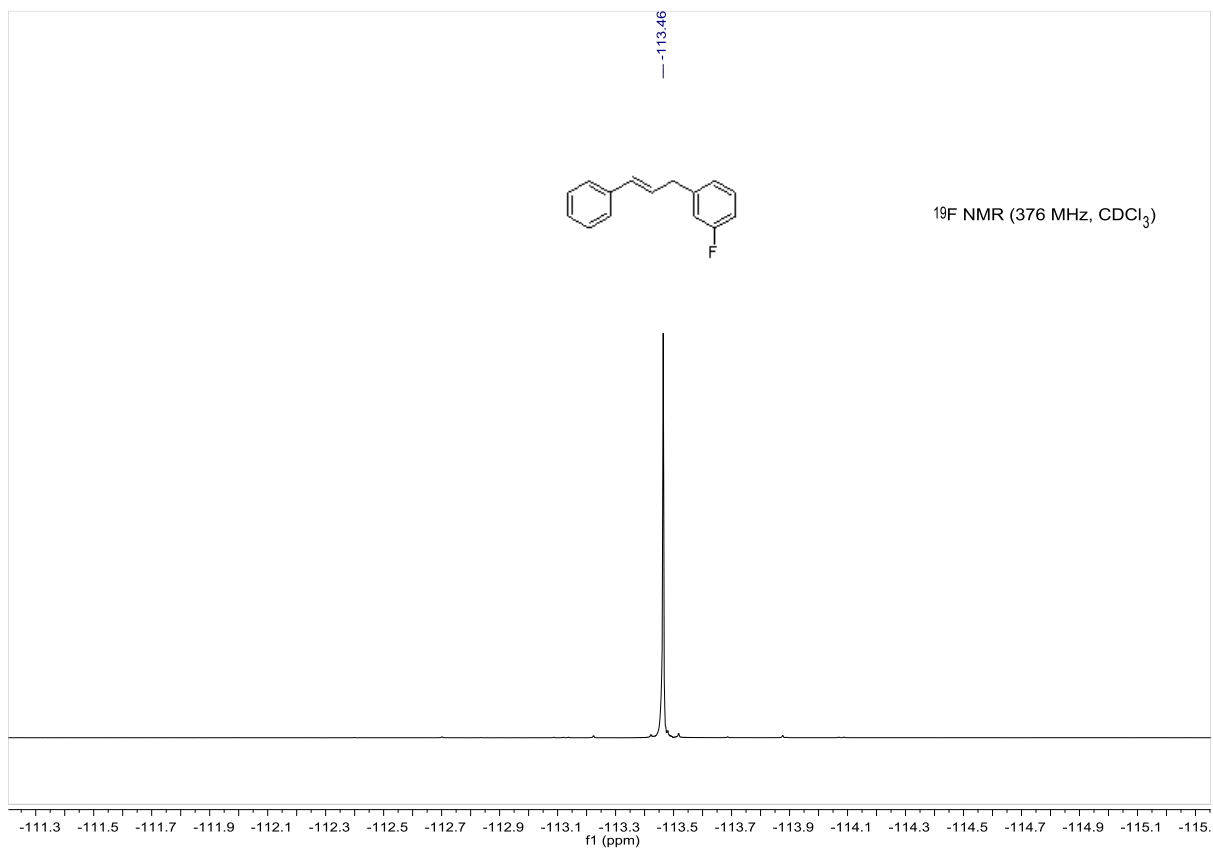

(13) 1-cinnamyl-4-(trifluoromethyl)benzene (**3ao**)

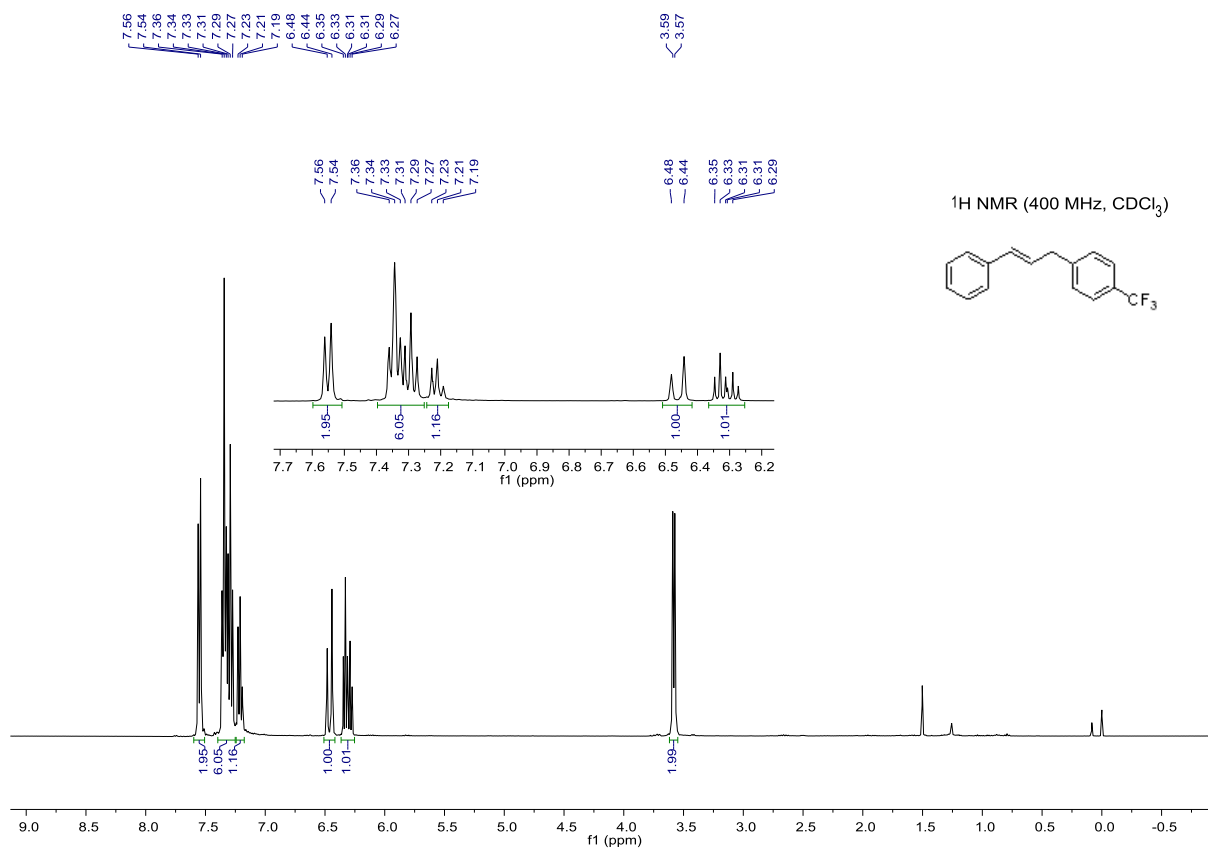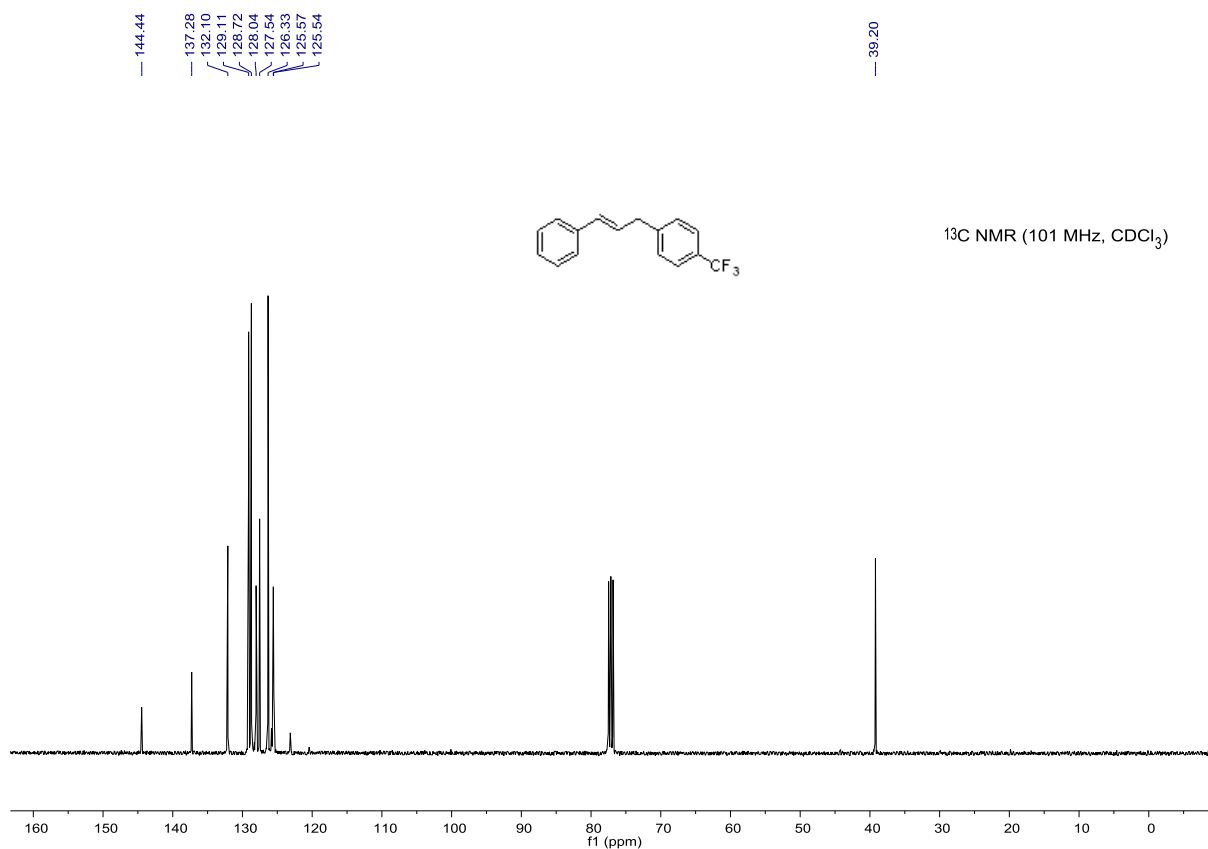



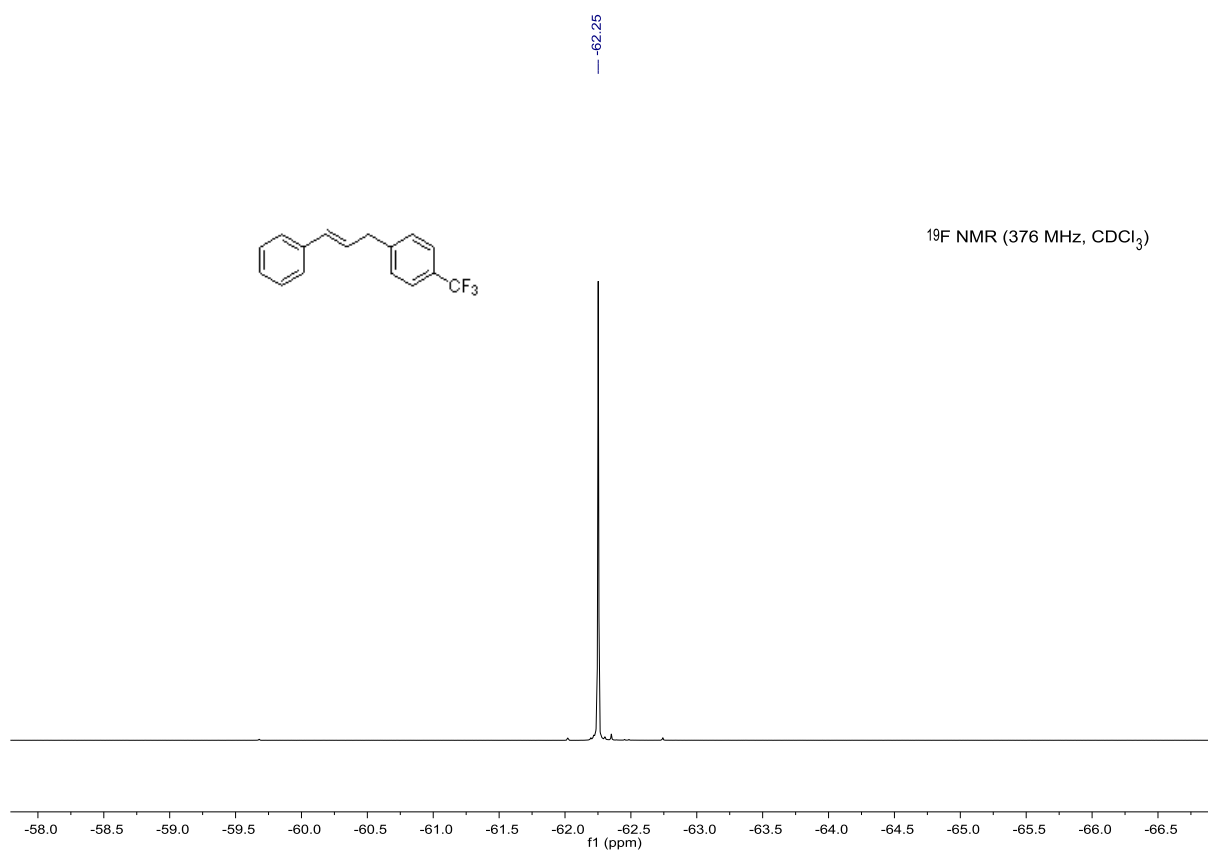

(14) ethyl 4'-cinnamyl-[1,1'-biphenyl]-4-carboxylate (**3ap**)

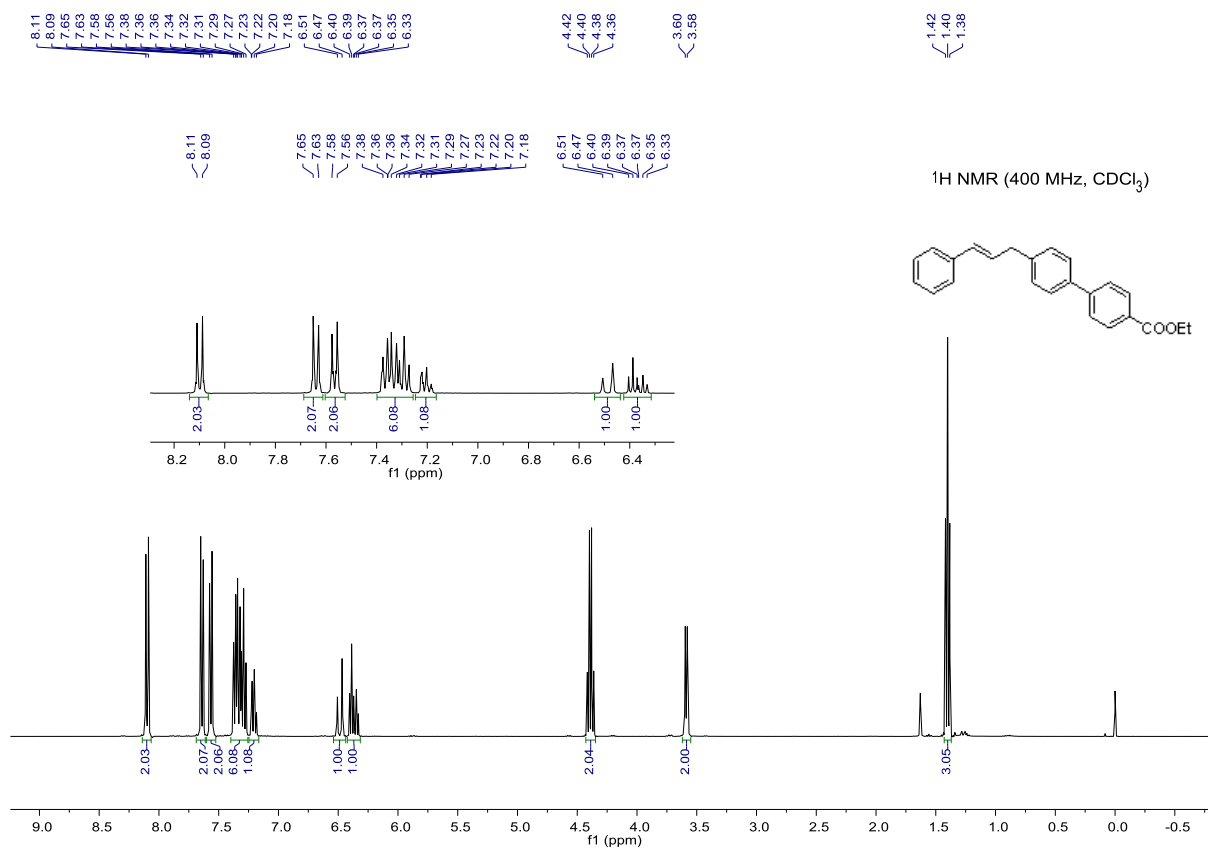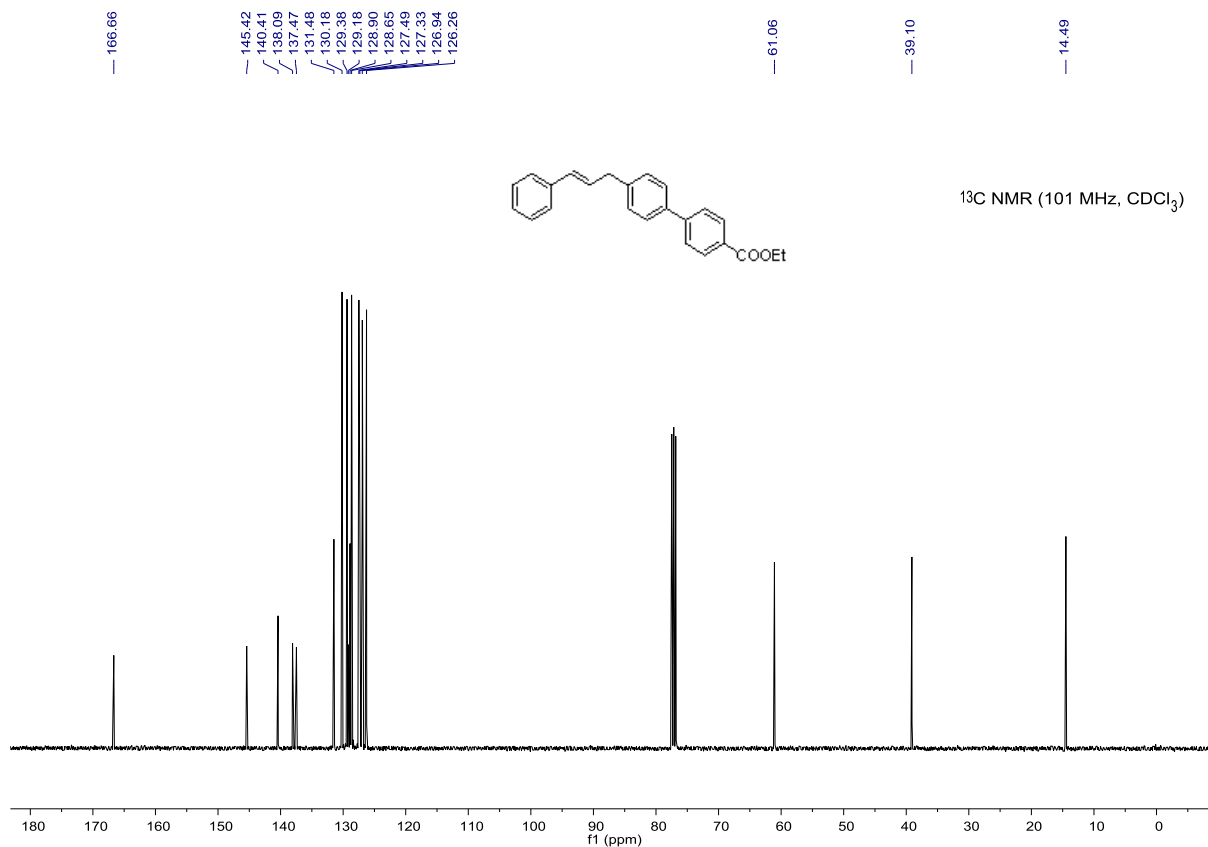

(15) 2-(3-cinnamylphenyl)pyridine (**3aq**)

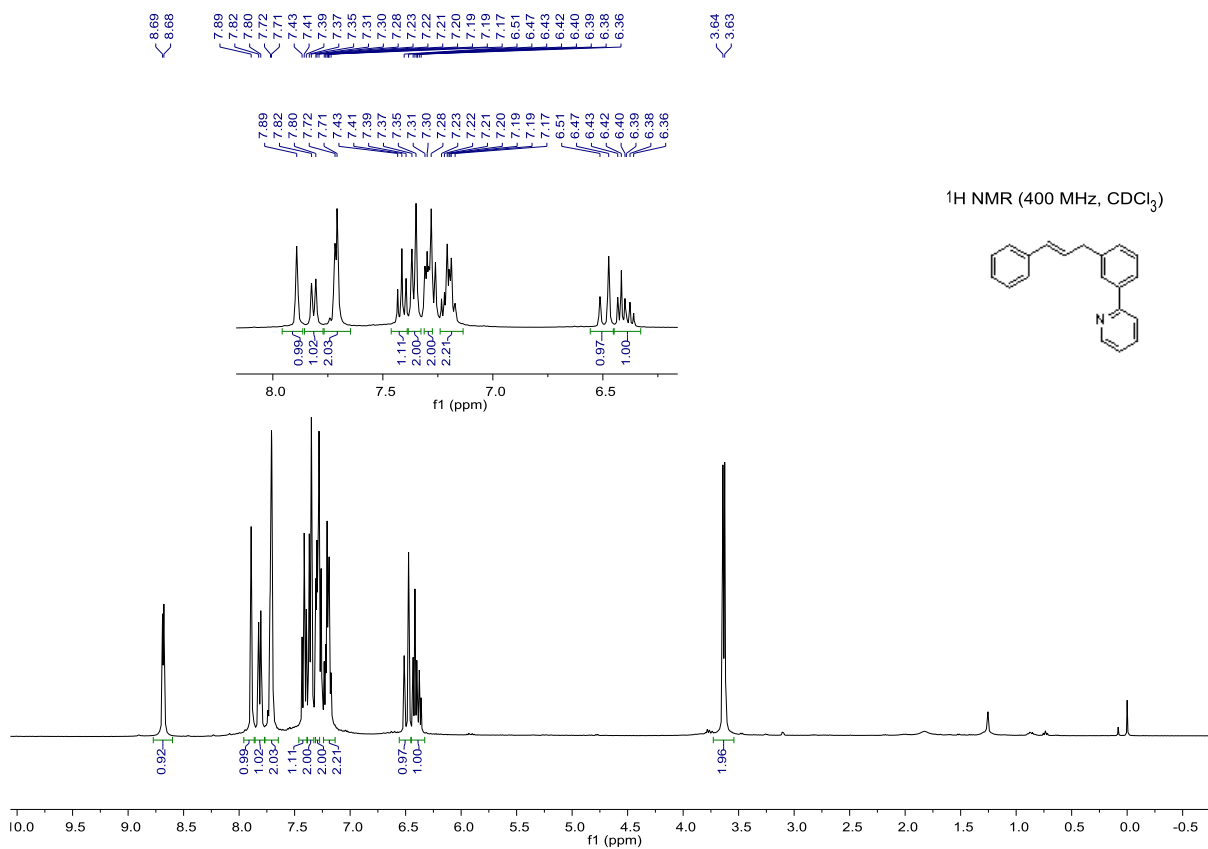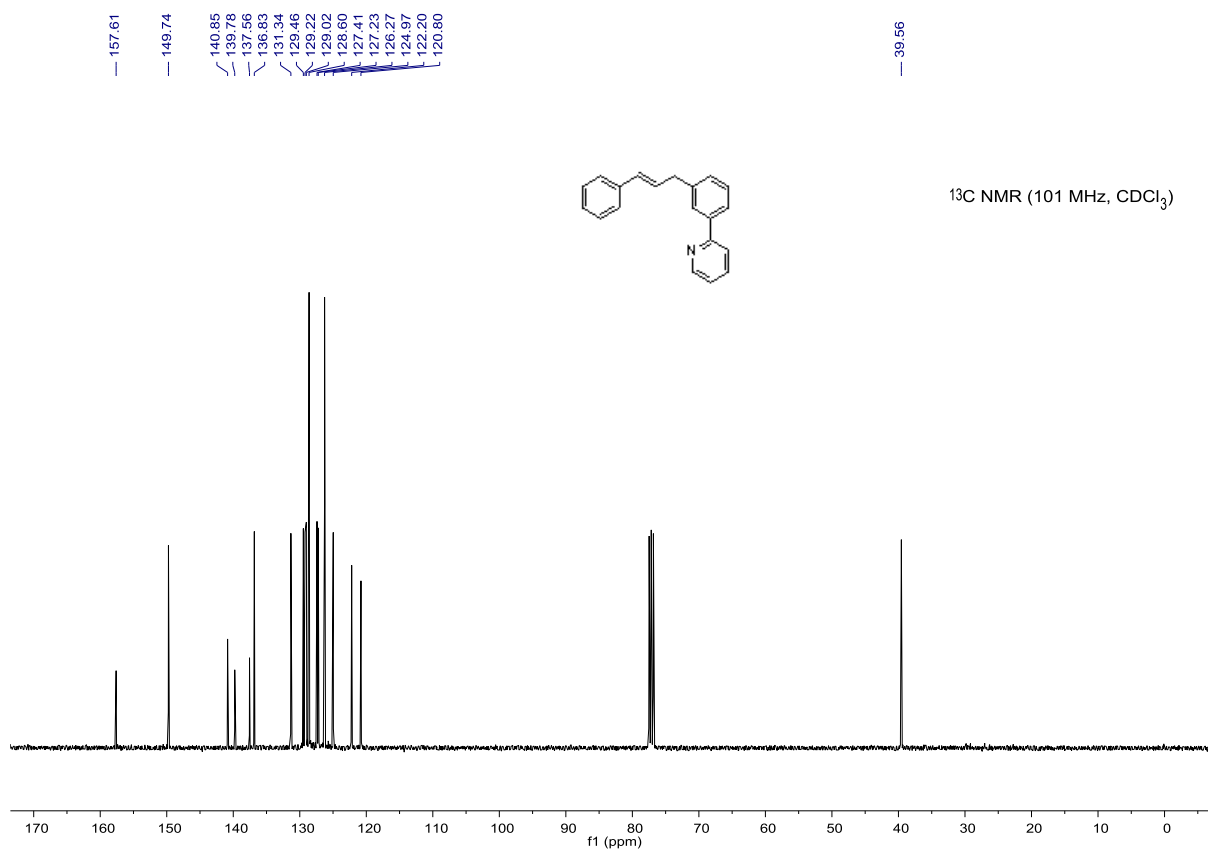

(16) 7-cinnamyl-2-methylquinoline (3ar)

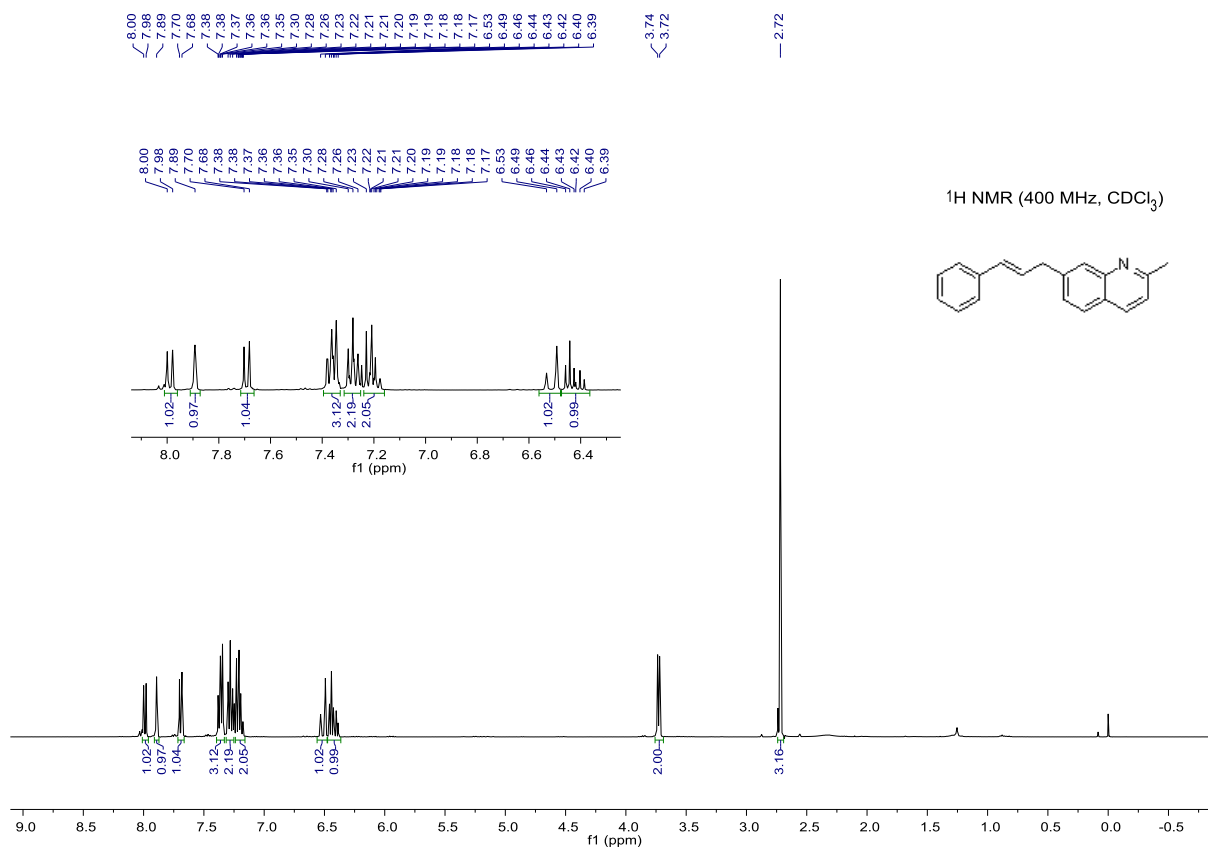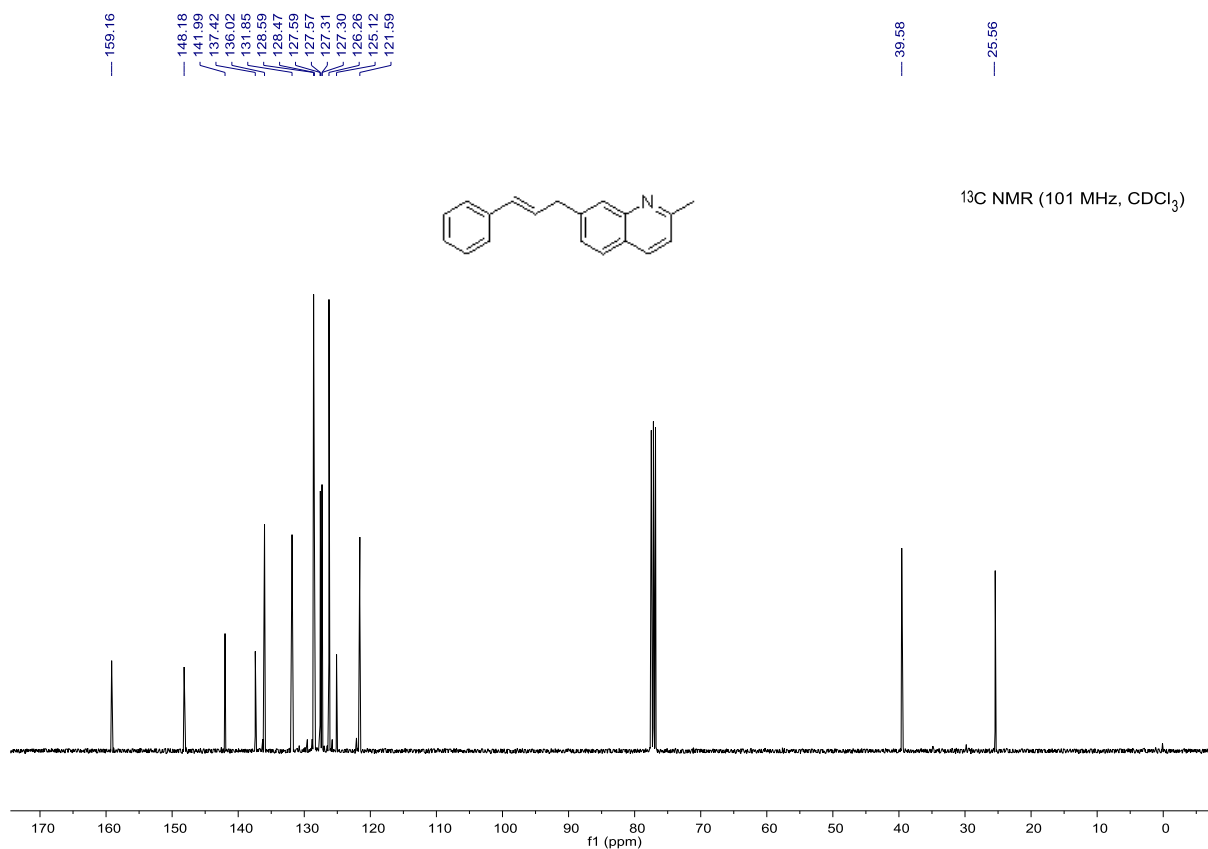

(17) (*E*)-4,4'-(prop-1-ene-1,3-diyl)bis(methylbenzene) (**3ba**)

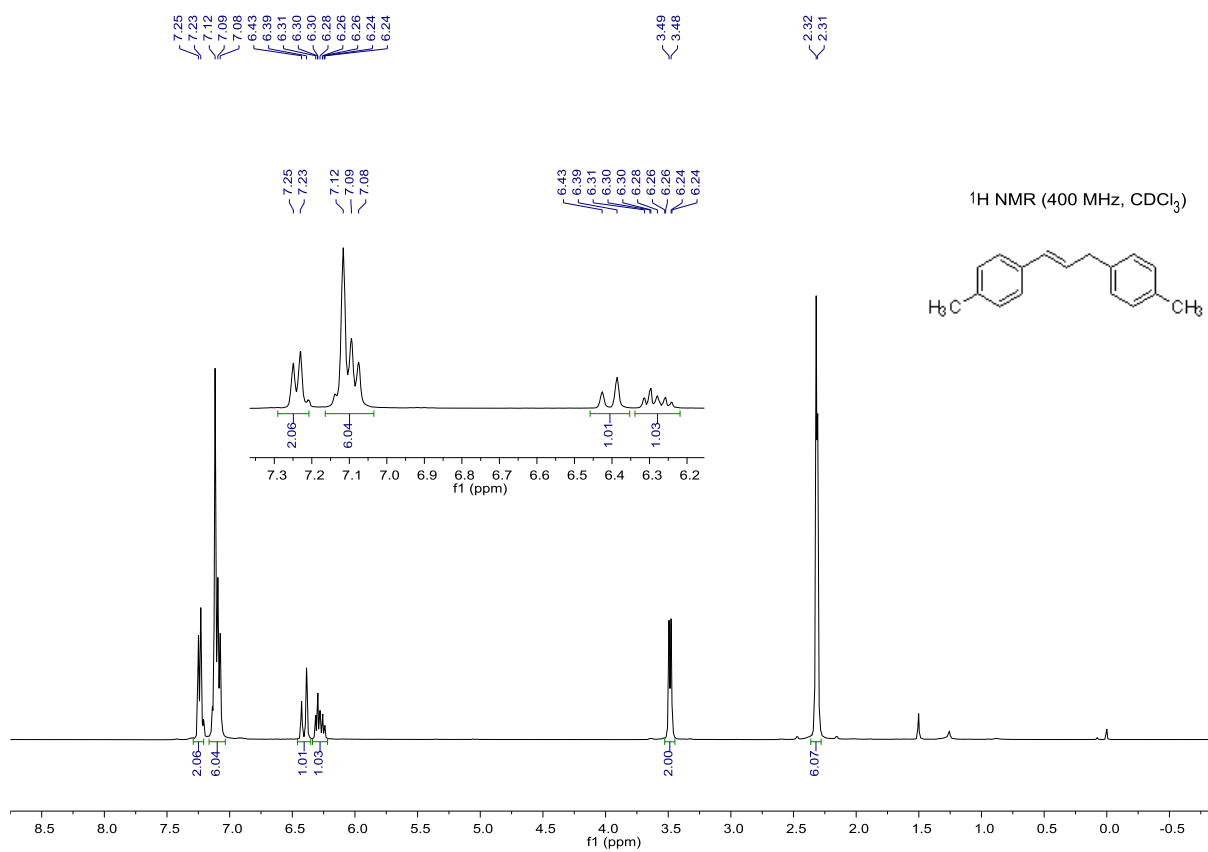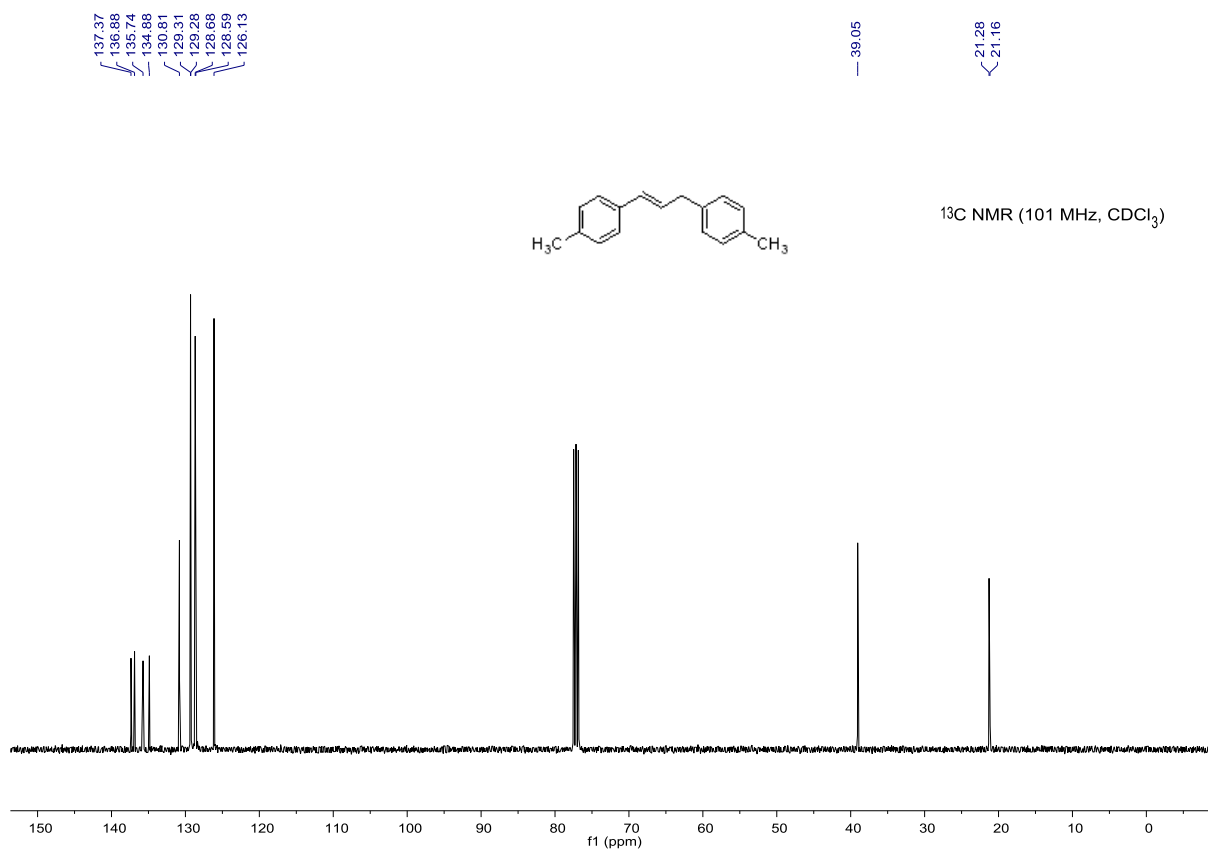

(18) (*E*)-1-methyl-3-(3-(*p*-tolyl)prop-1-en-1-yl)benzene (**3bb**)

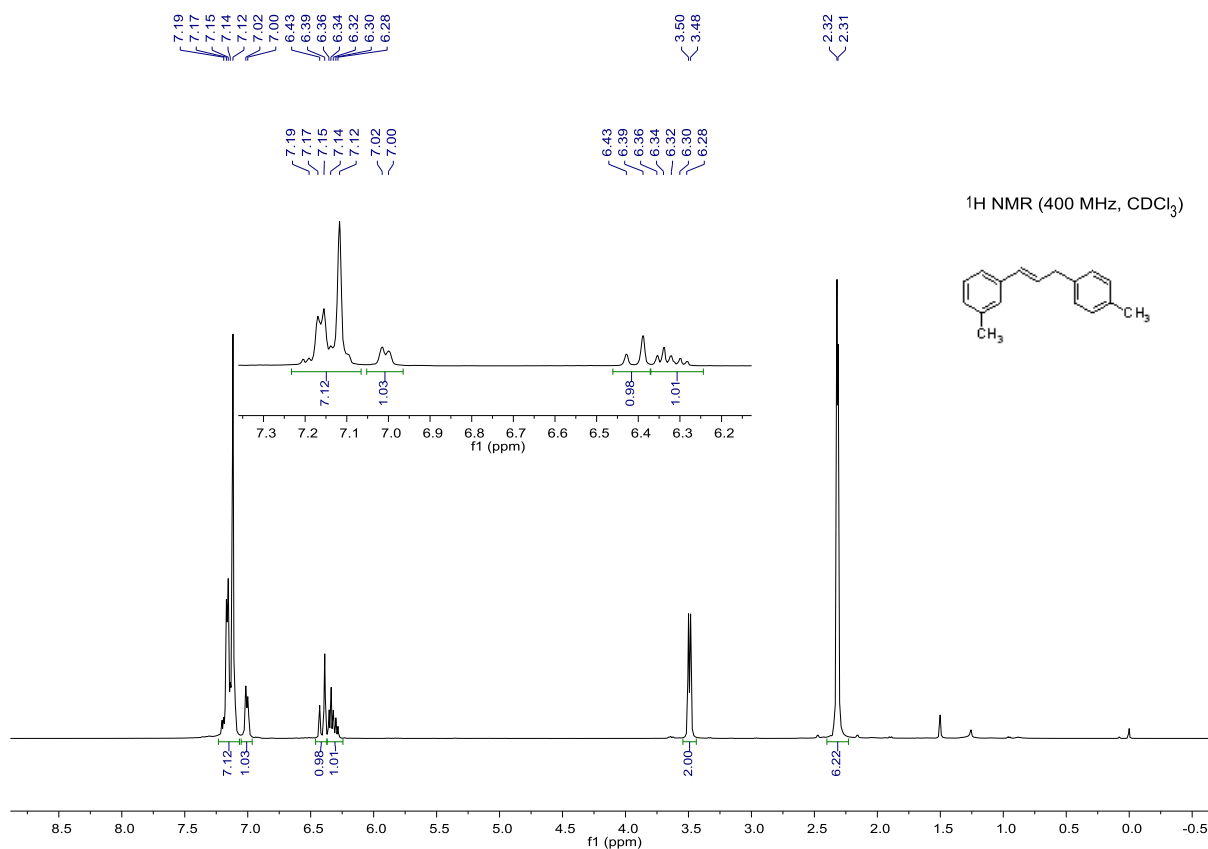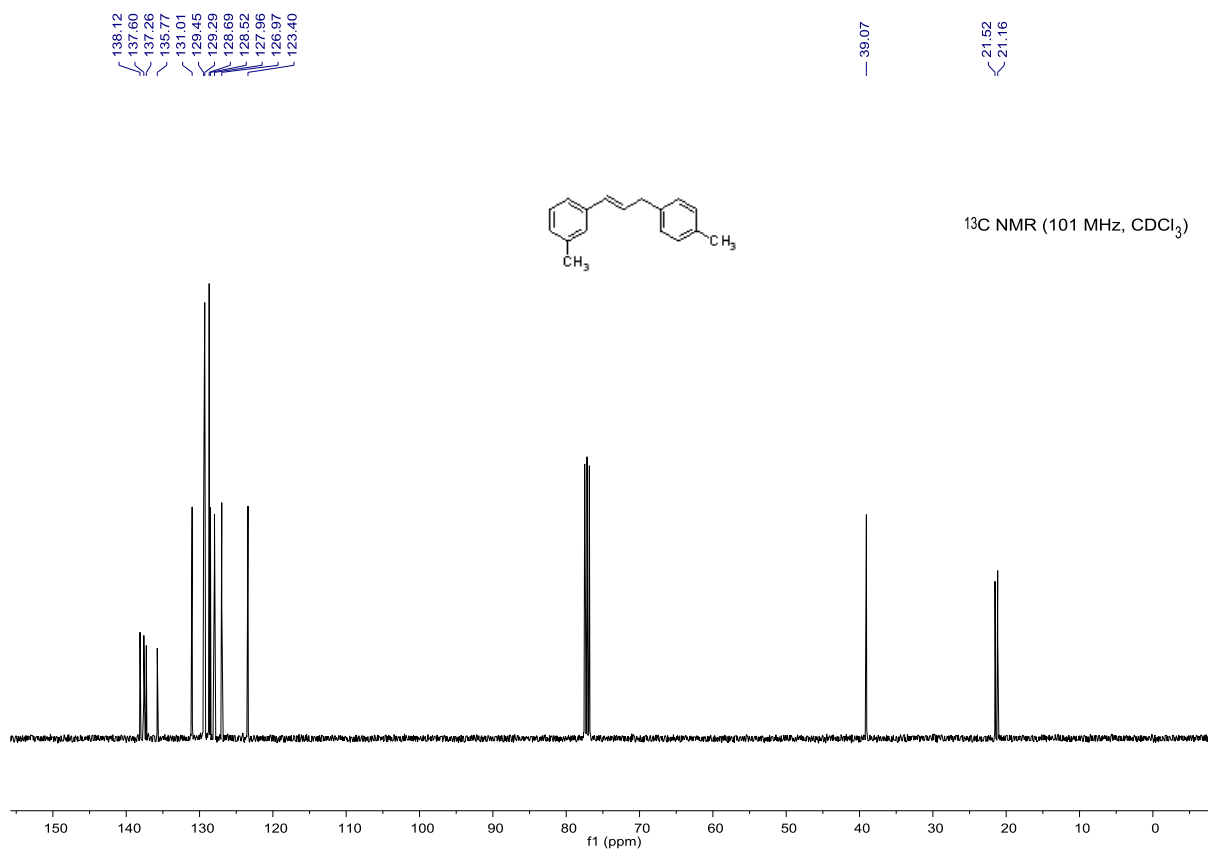

(19) (*E*)-1-(*tert*-butyl)-4-(3-(*p*-tolyl)prop-1-en-1-yl)benzene (**3bc**)

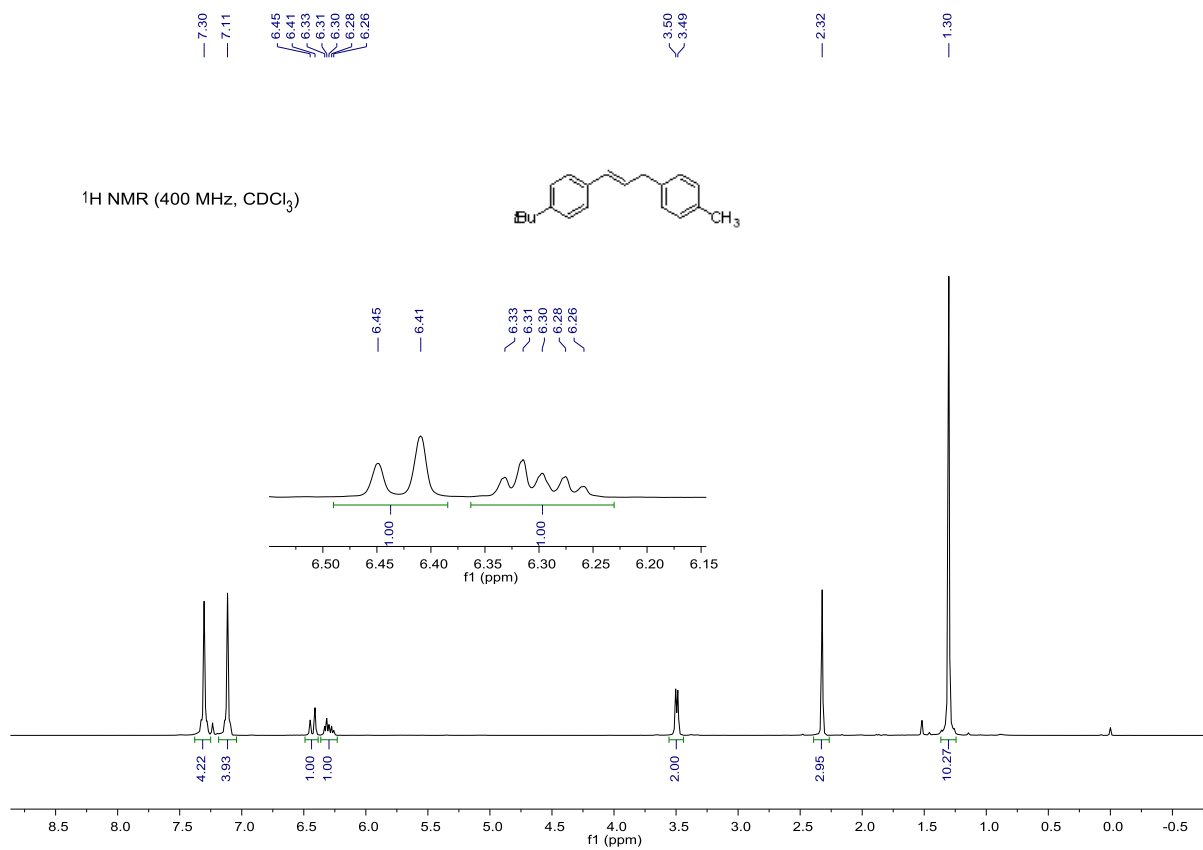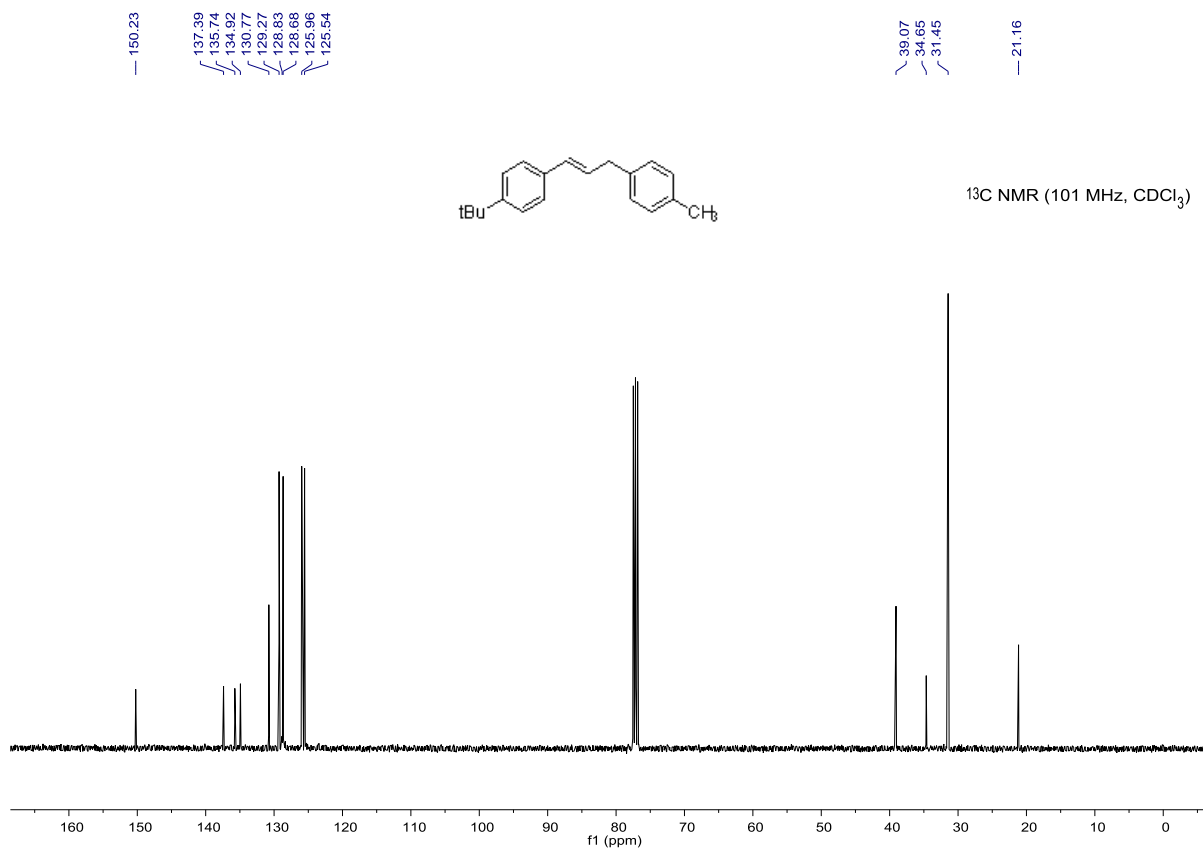

(20) (*E*)-*N,N*-dimethyl-4-(3-(*p*-tolyl)prop-1-en-1-yl)aniline (**3bd**)

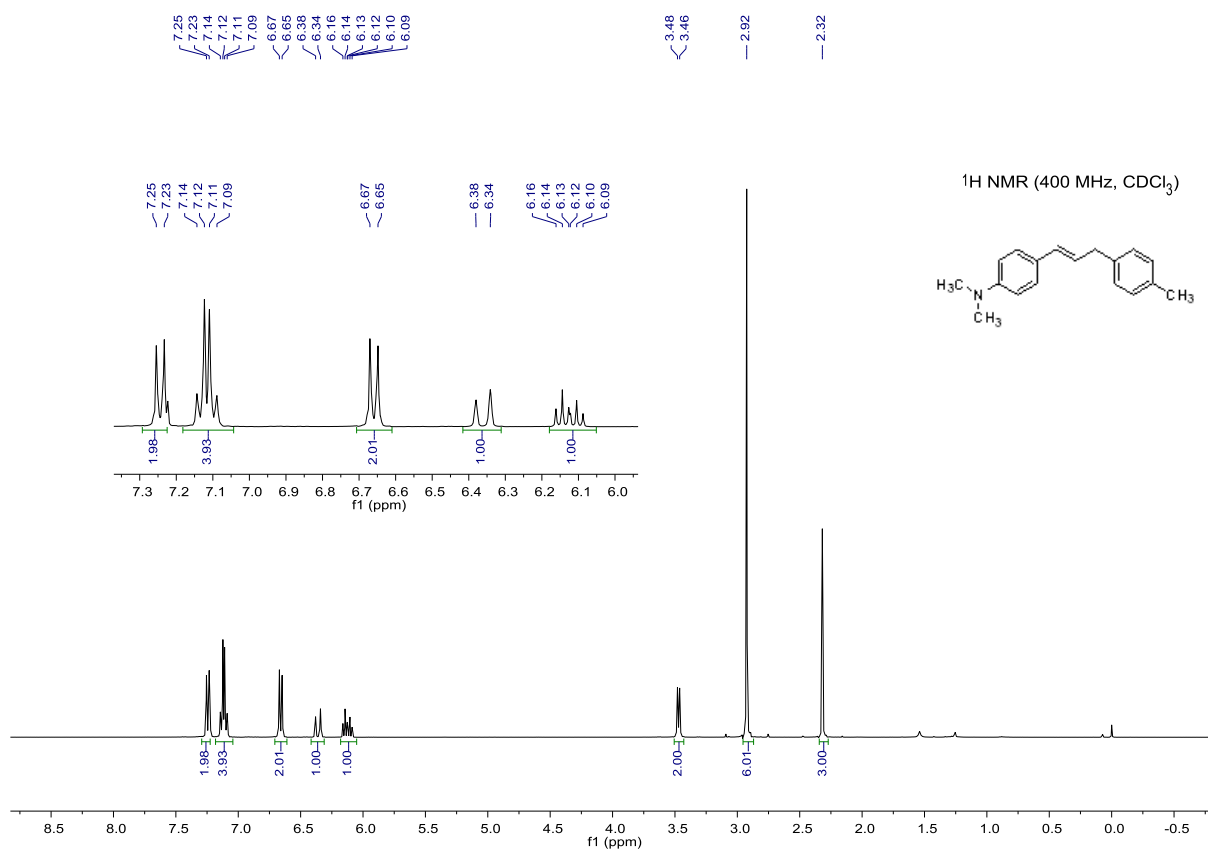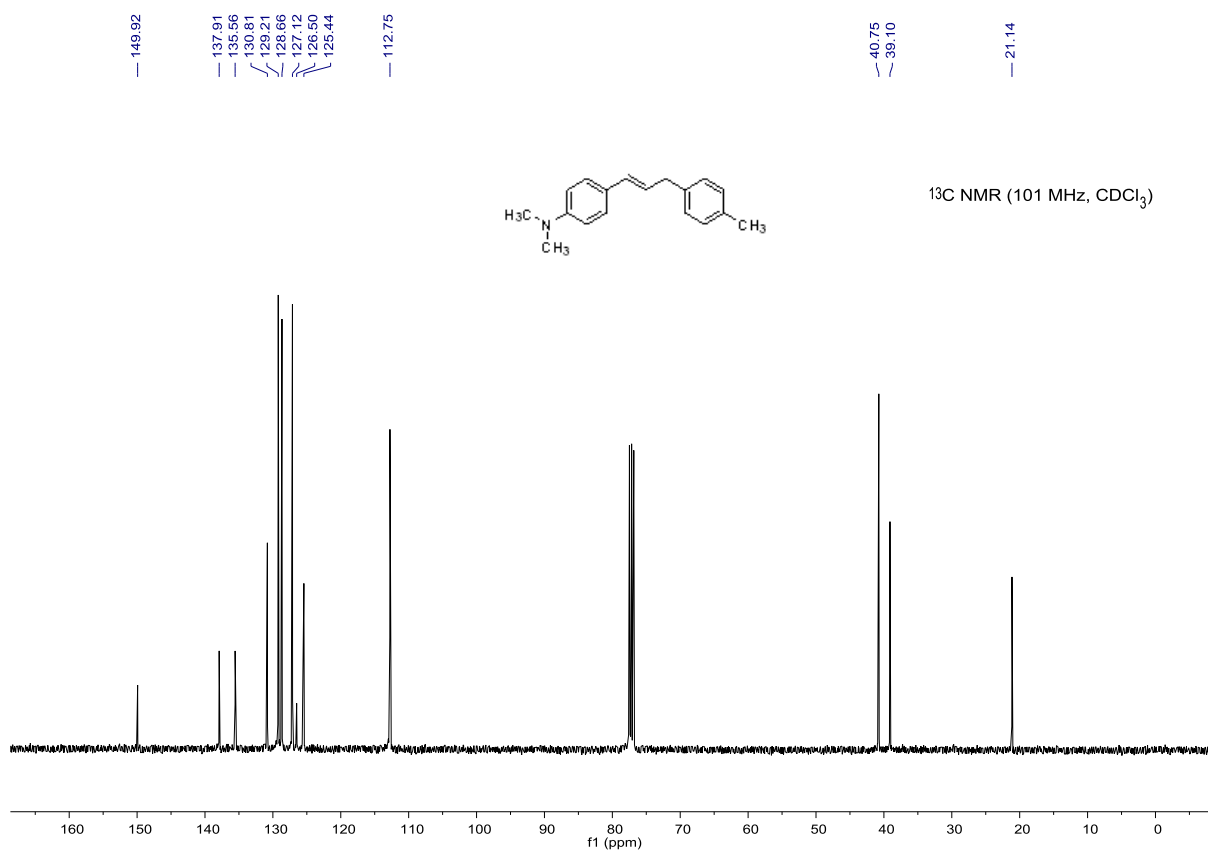



(21) (E)-1-methoxy-4-(3-(p-tolyl)prop-1-en-1-yl)benzene (**3be**)

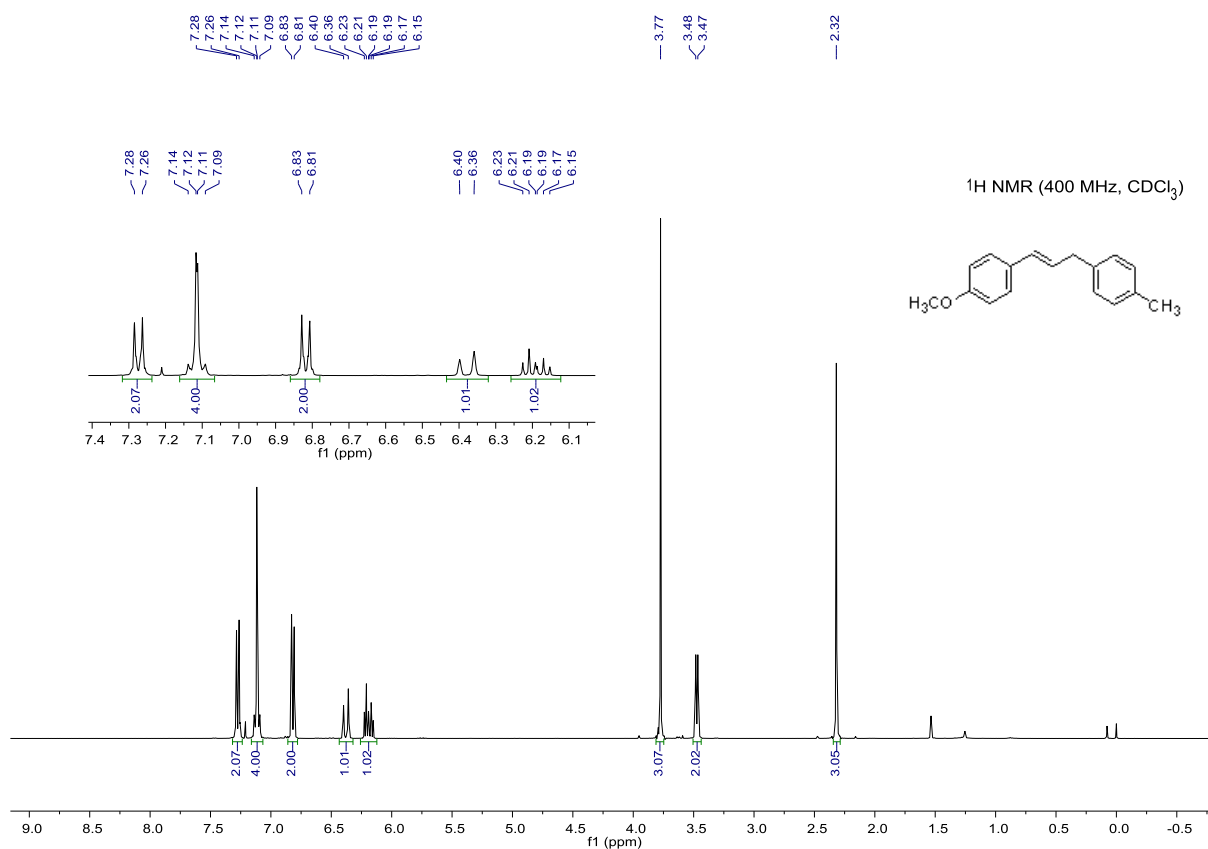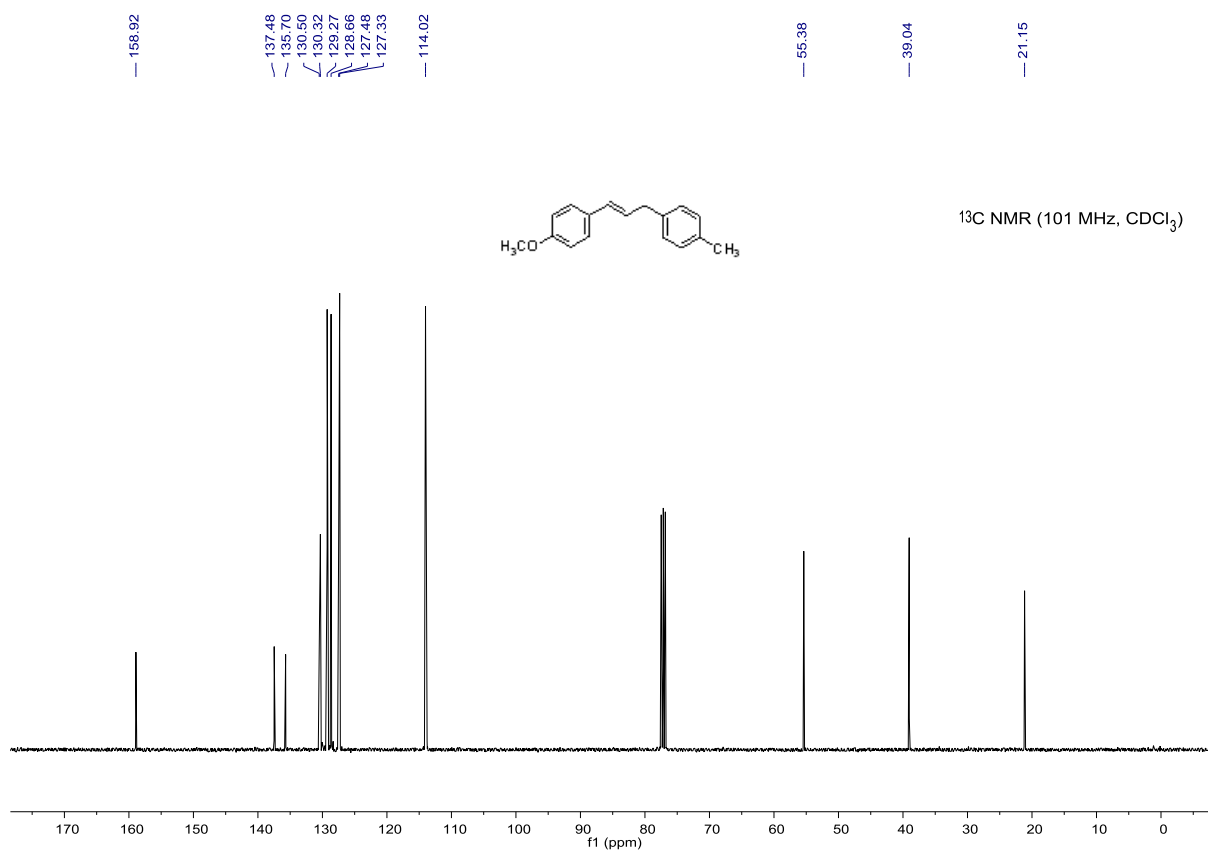

(22) (*E*)-1-methoxy-3-(3-(*p*-tolyl)prop-1-en-1-yl)benzene (**3bf**)

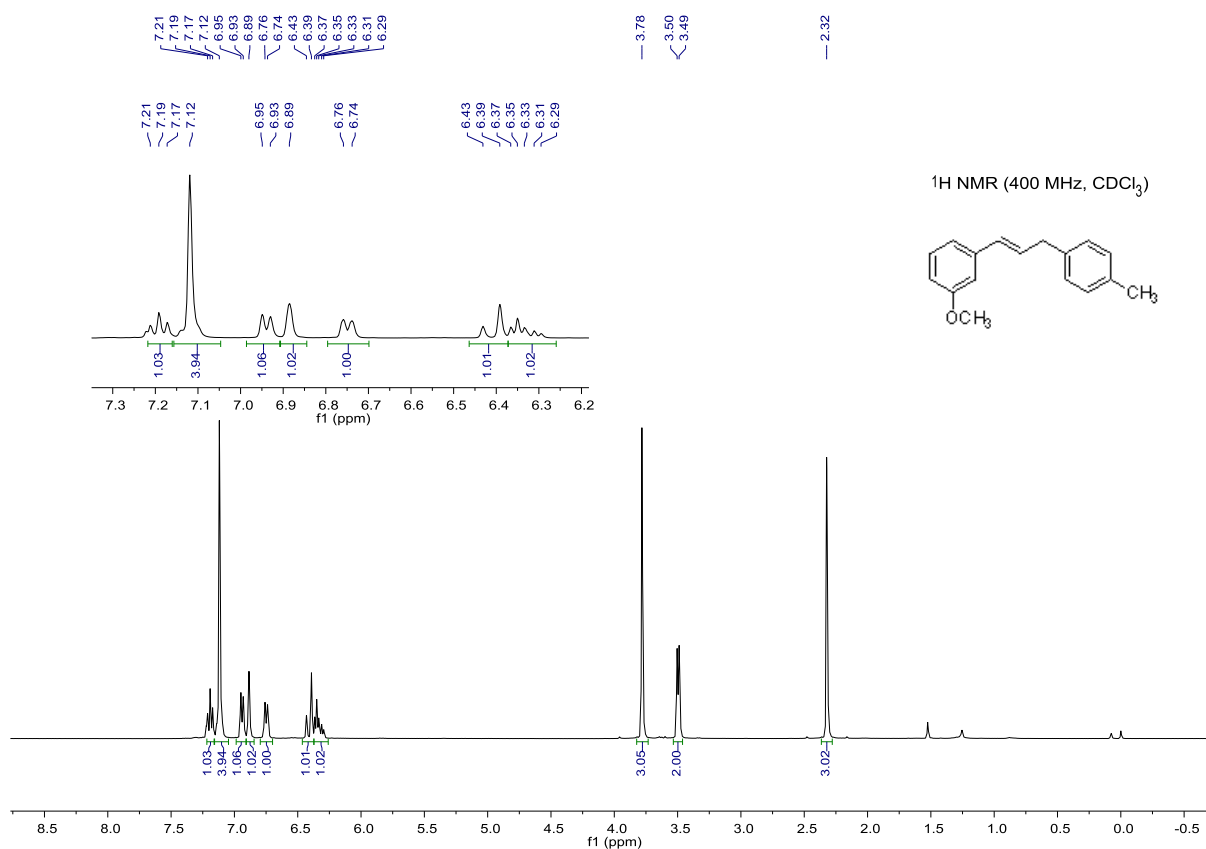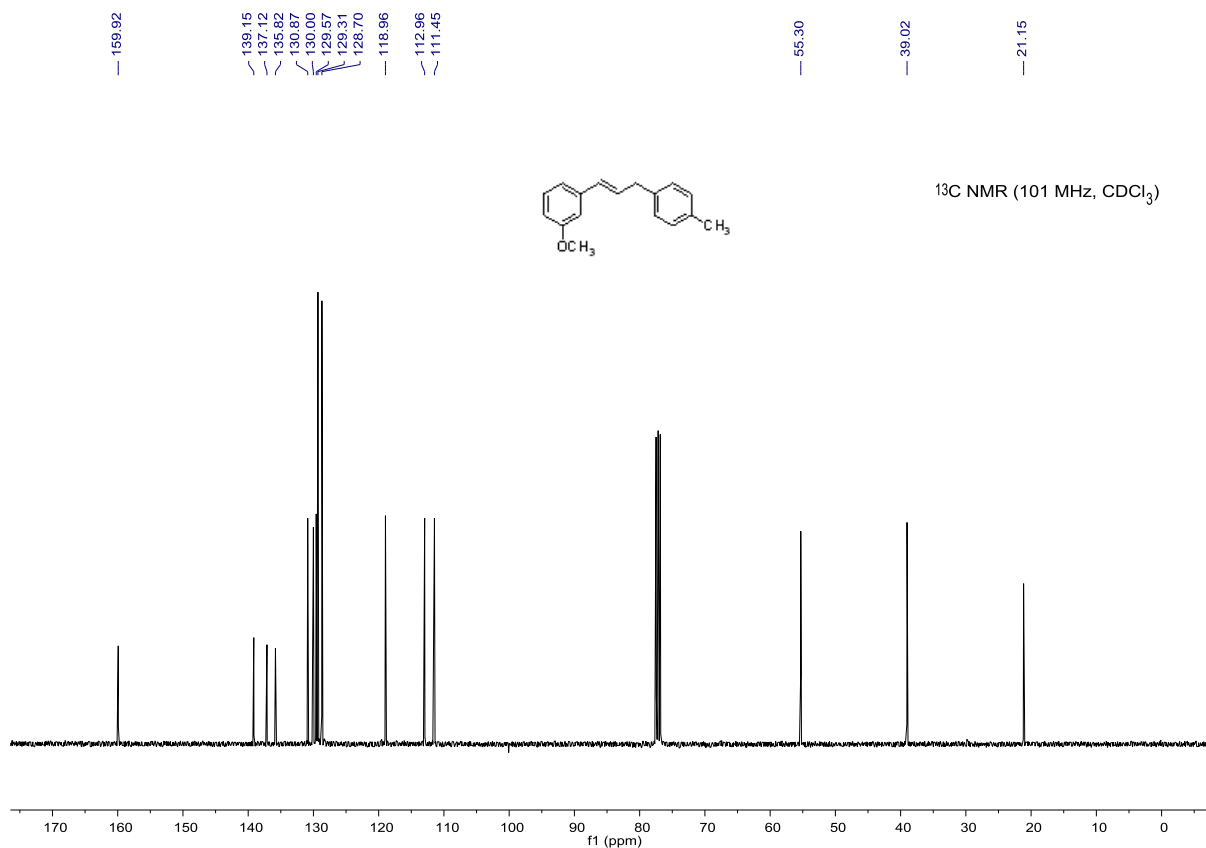

(23) (*E*)-1-phenoxy-3-(3-(*p*-tolyl)prop-1-en-1-yl)benzene (**3bg**)

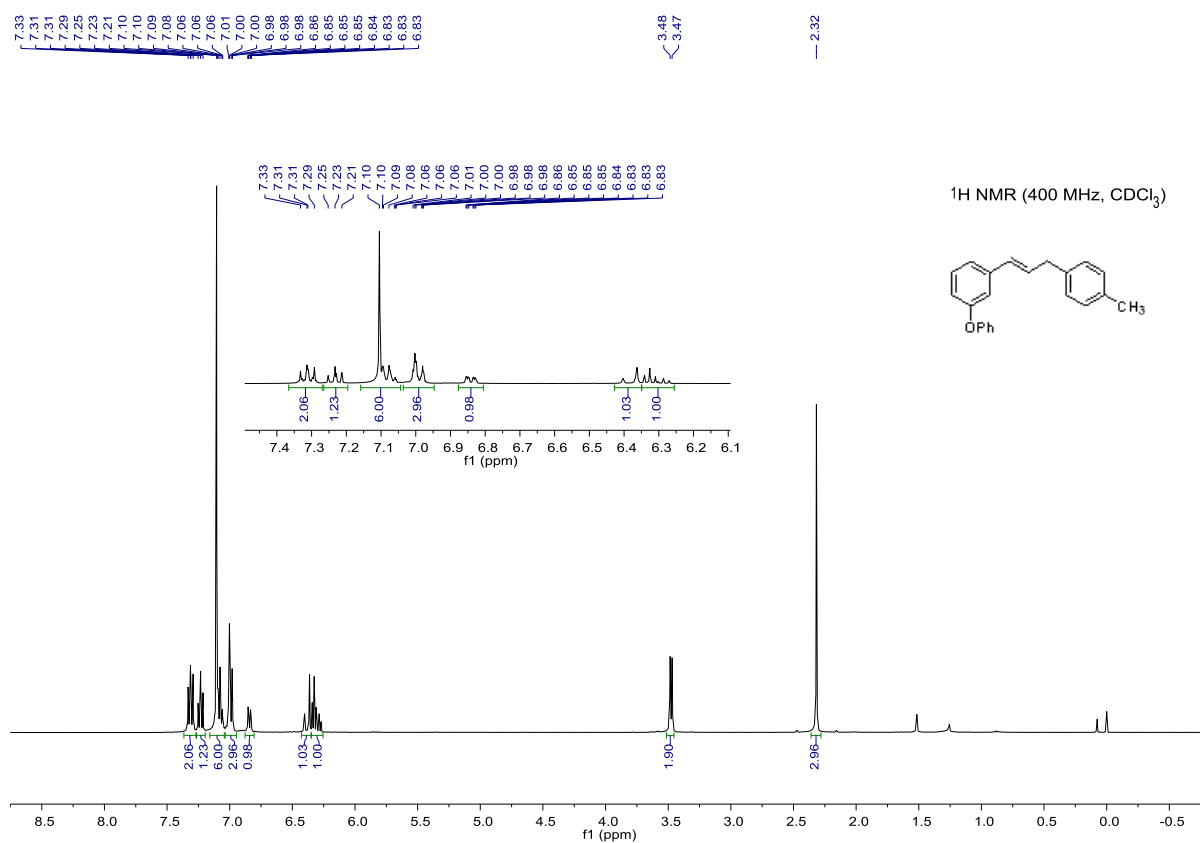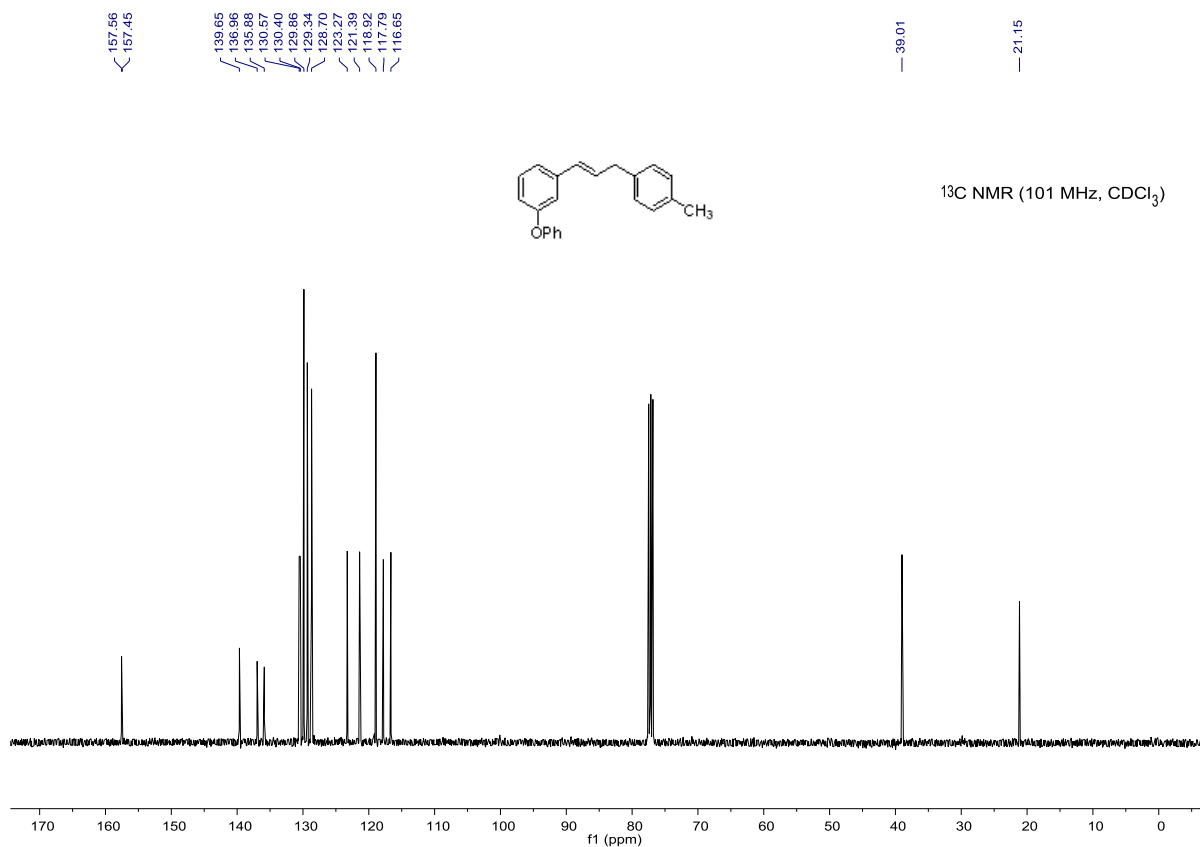

(24) (E)-5-(3-(*p*-tolyl)prop-1-en-1-yl)benzo[*d*][1,3]dioxole (**3bh**)

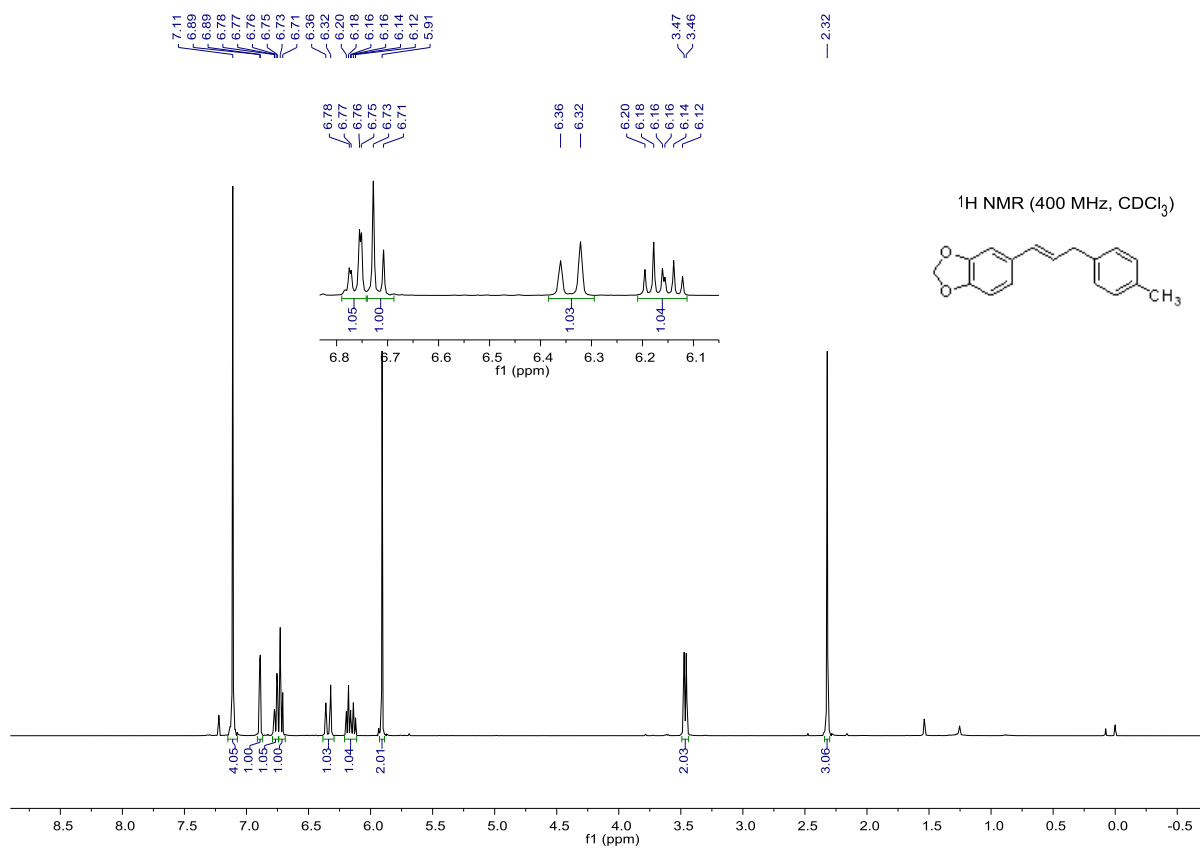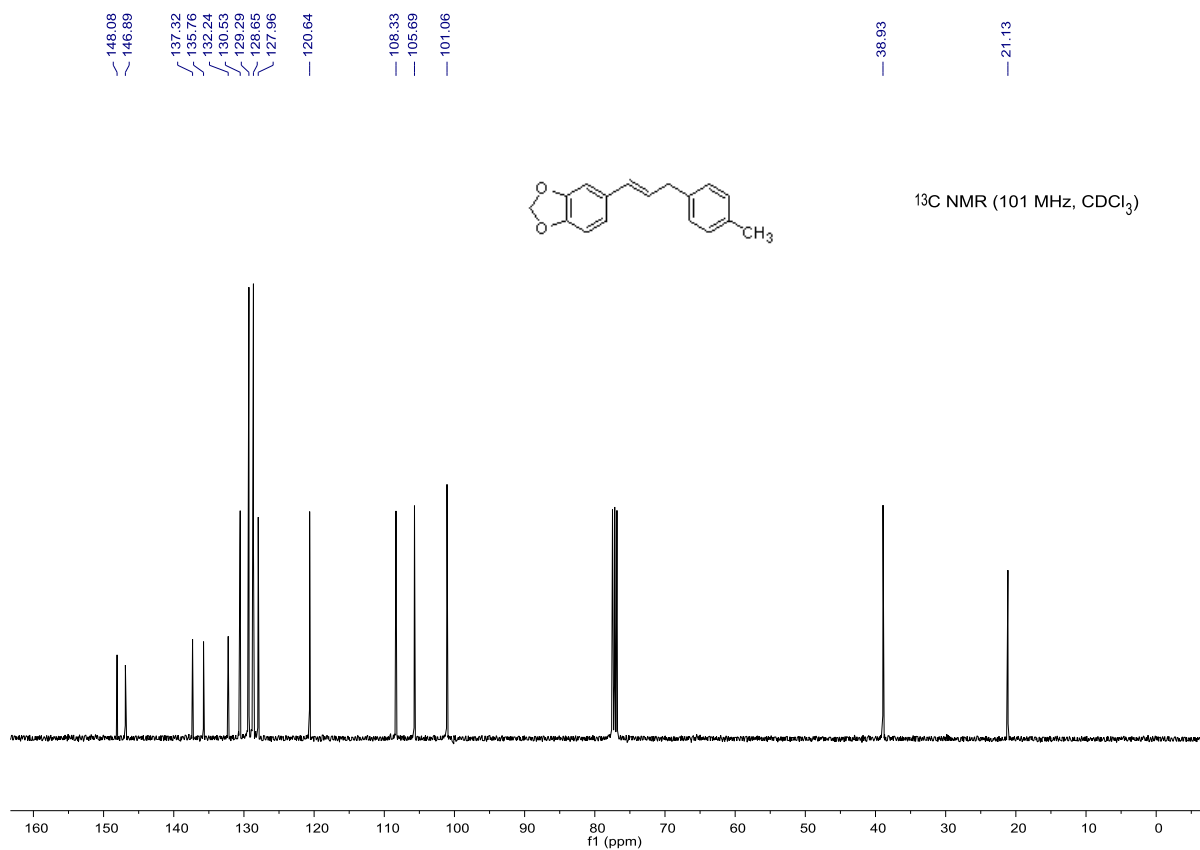

(25) (*E*)-2-(3-(*p*-tolyl)prop-1-en-1-yl)naphthalene (**3bi**)

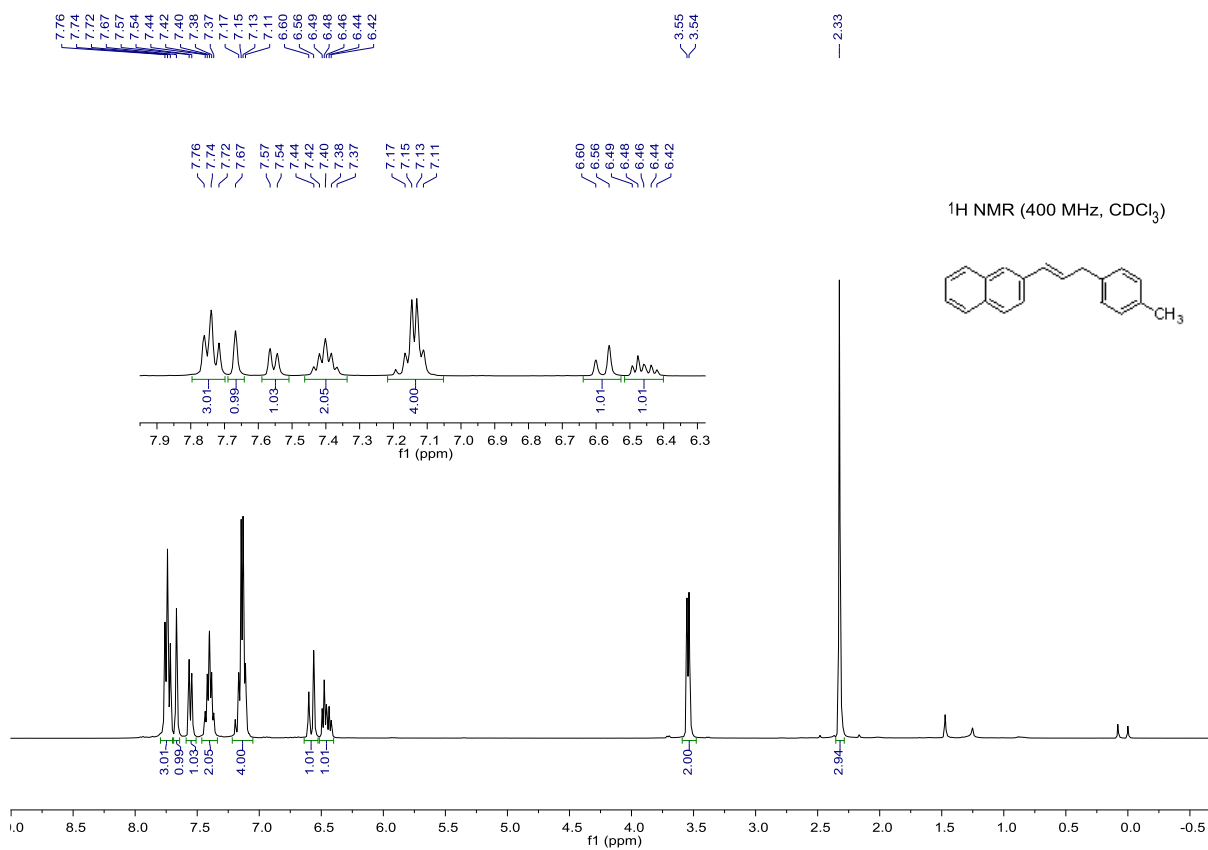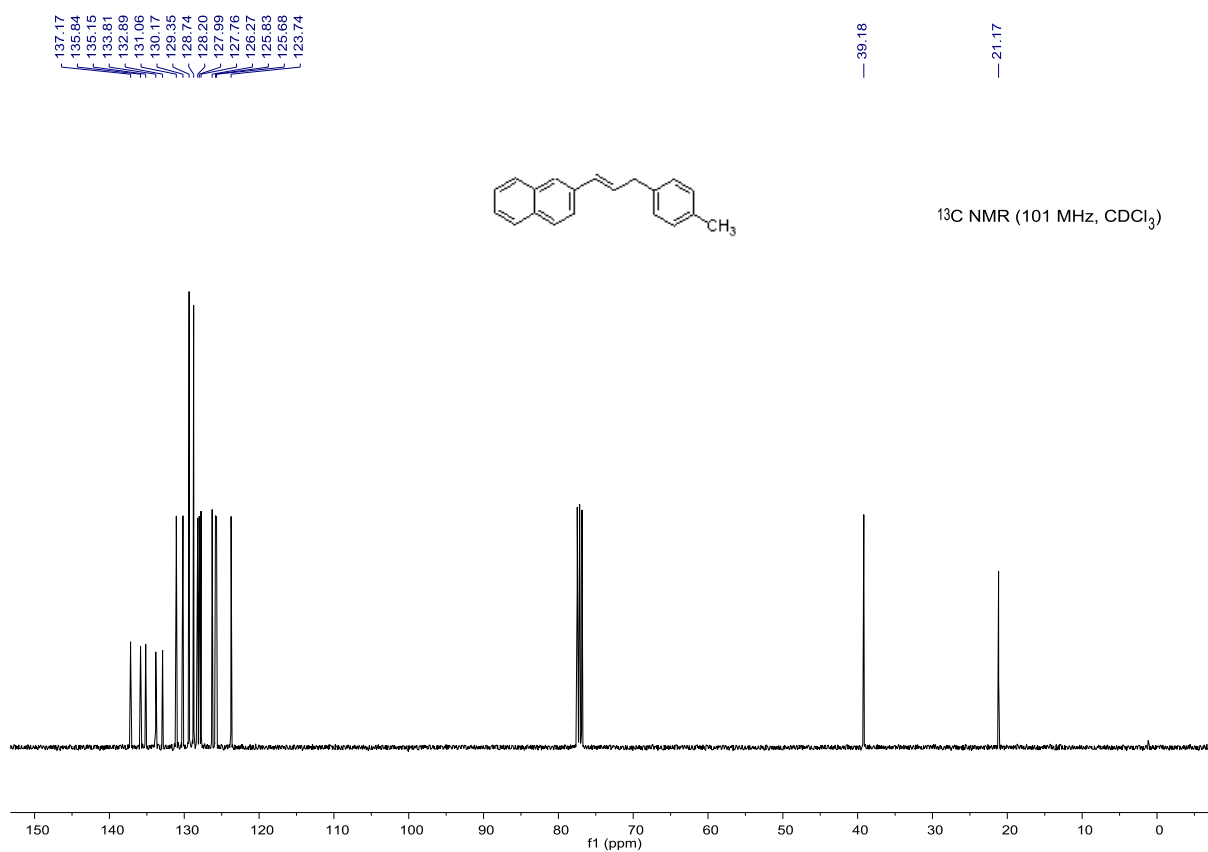

(26) (*E*)-1-(3-(*p*-tolyl)prop-1-en-1-yl)naphthalene (**3bj**)

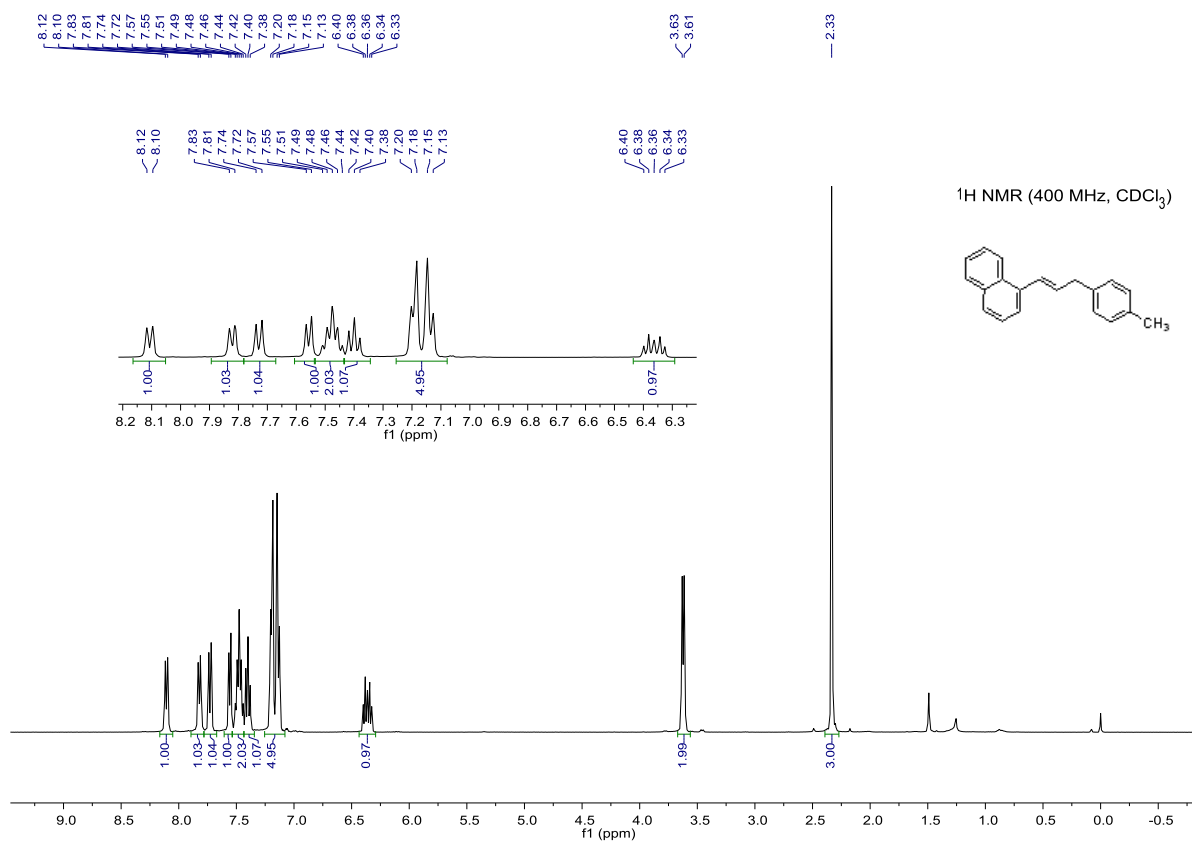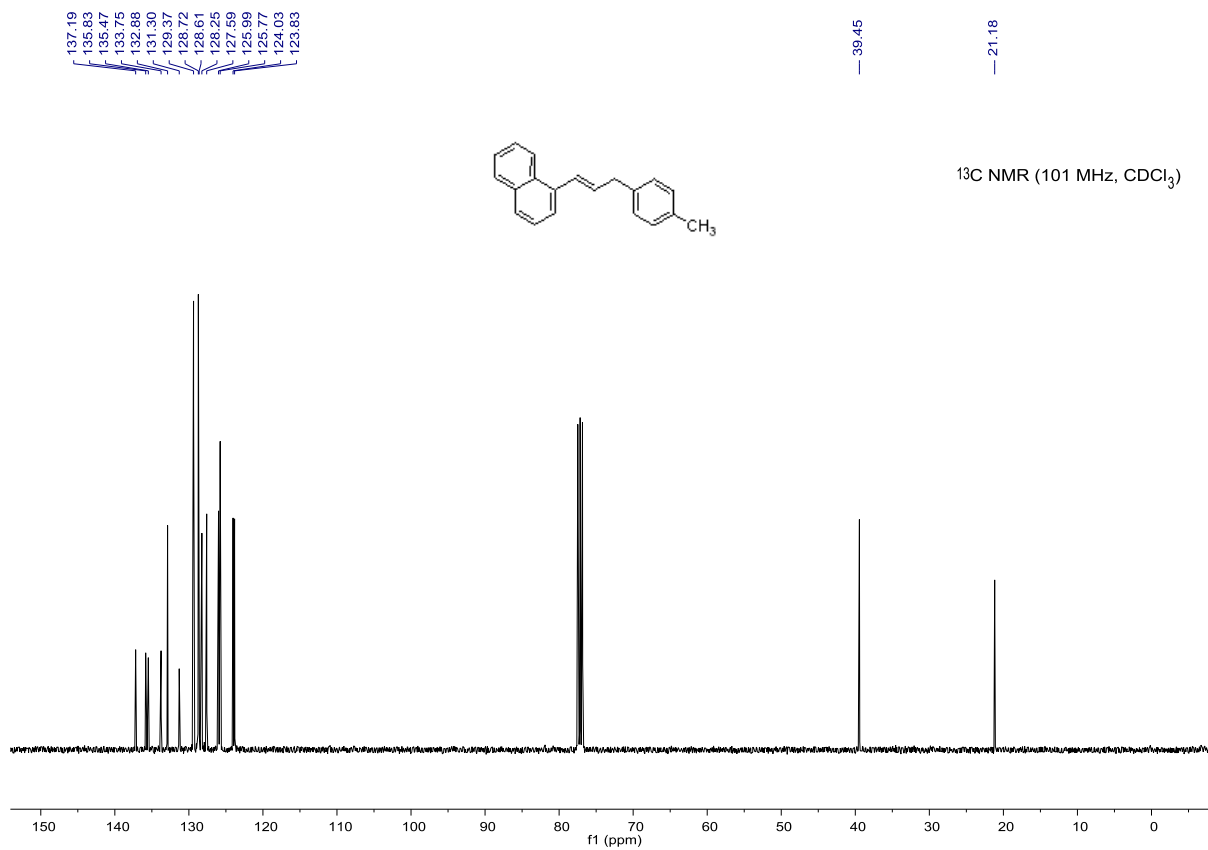

(27) (E)-2-(3-(p-tolyl)prop-1-en-1-yl)-1,1'-biphenyl (**3bk**)

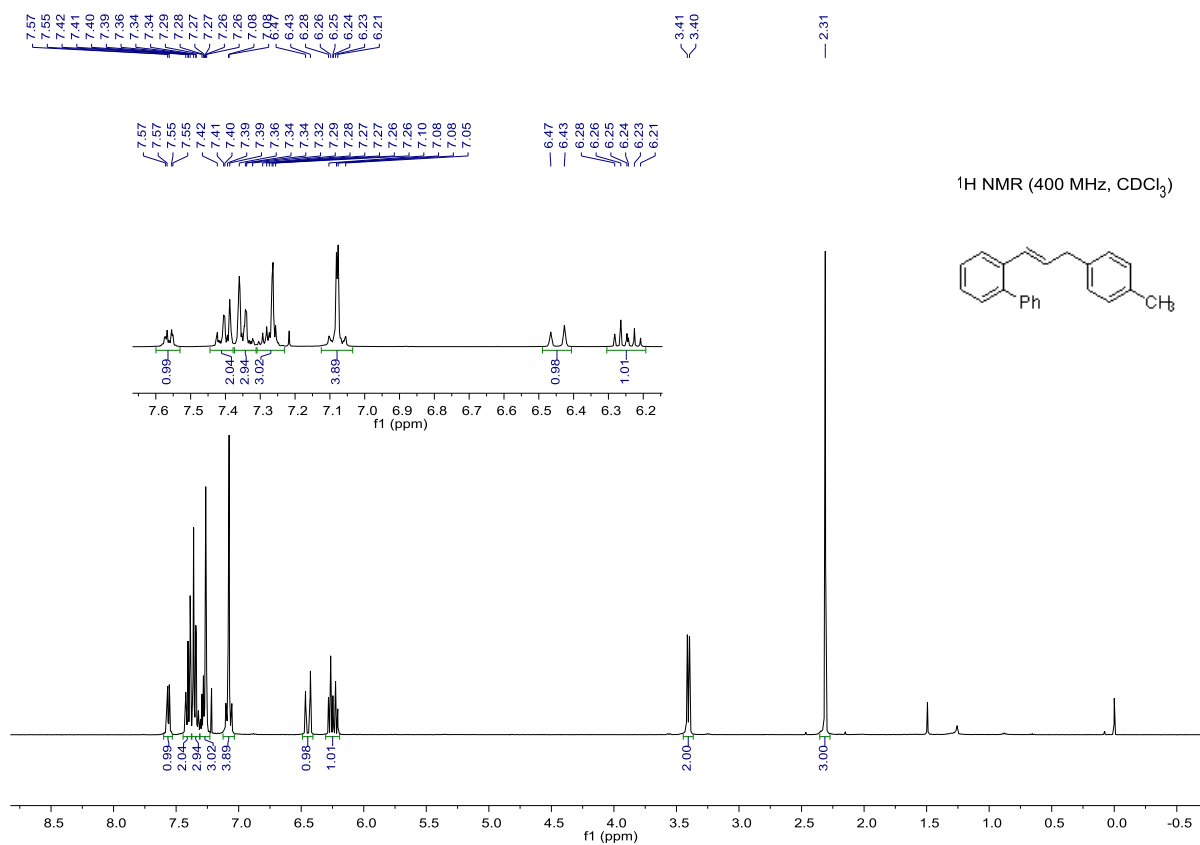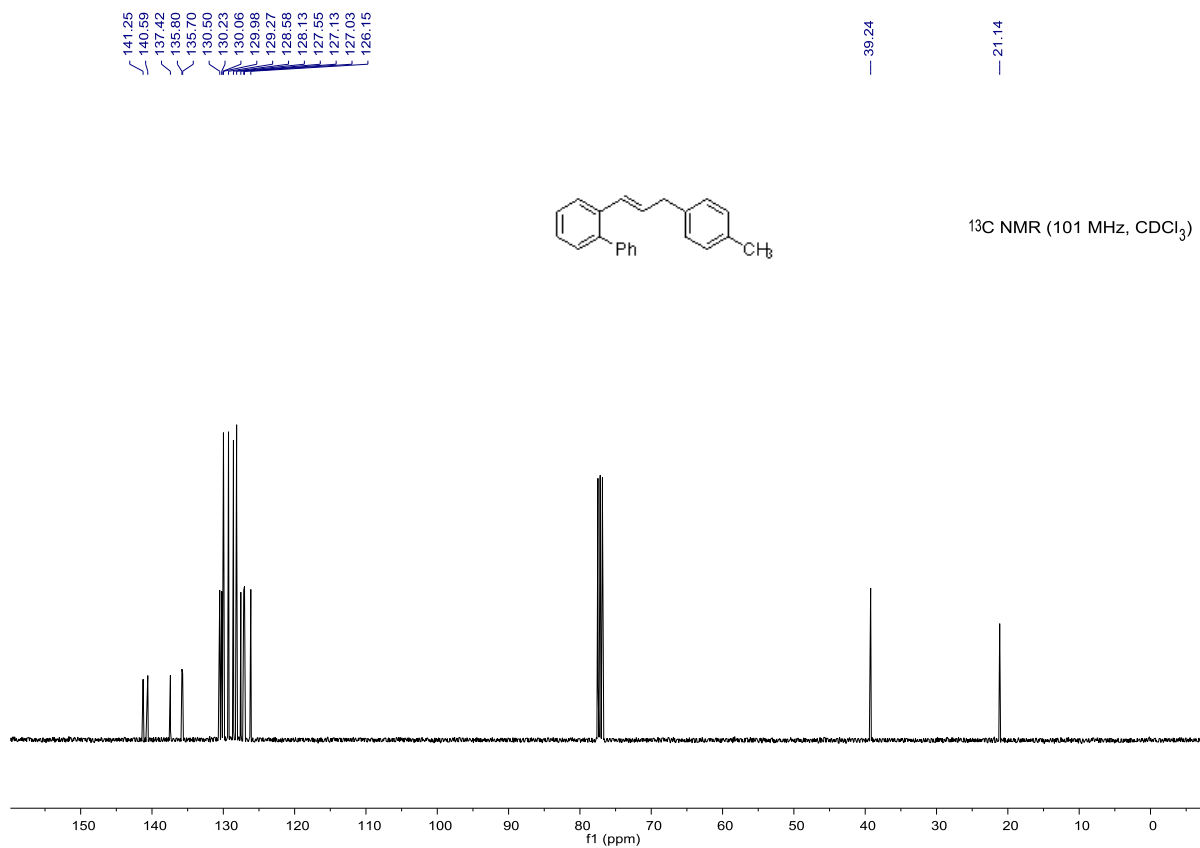

(28) (E)-1-fluoro-4-(3-(p-tolyl)prop-1-en-1-yl)benzene (**3b1**)

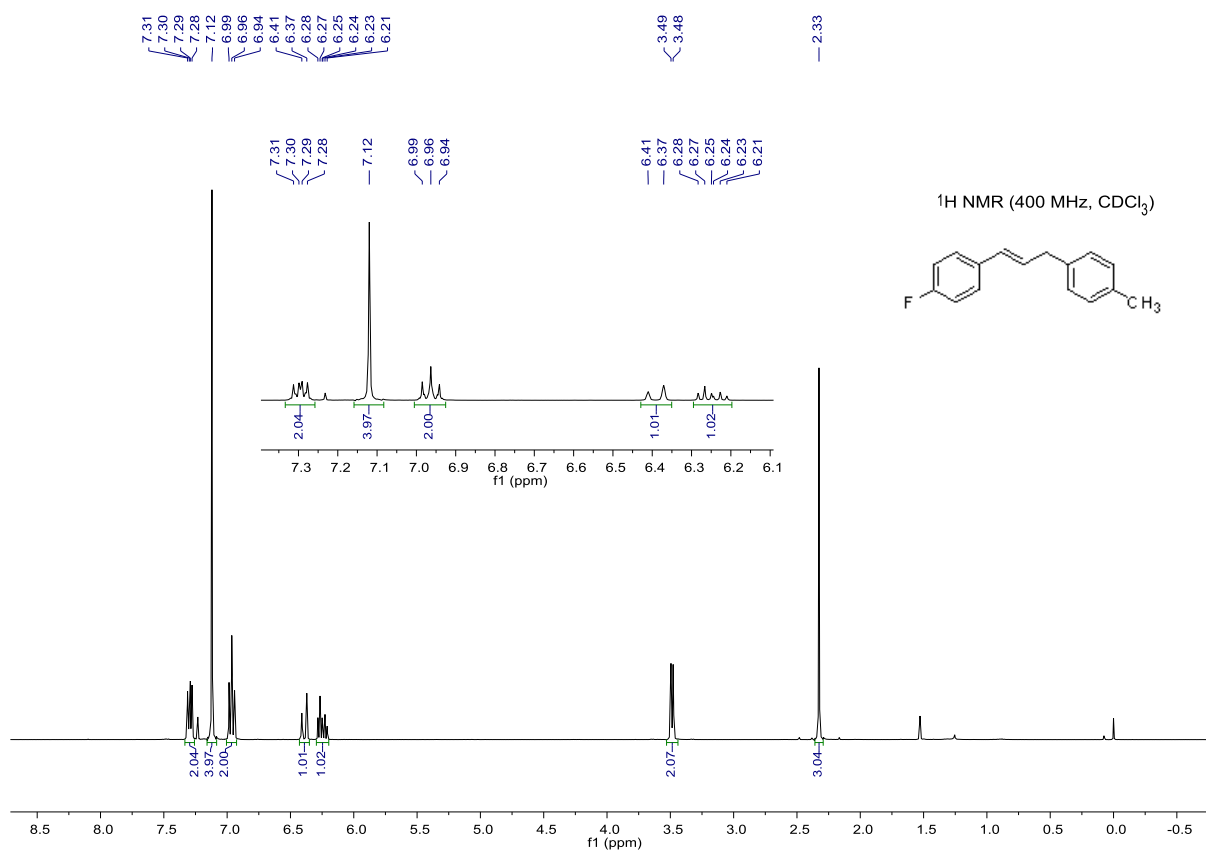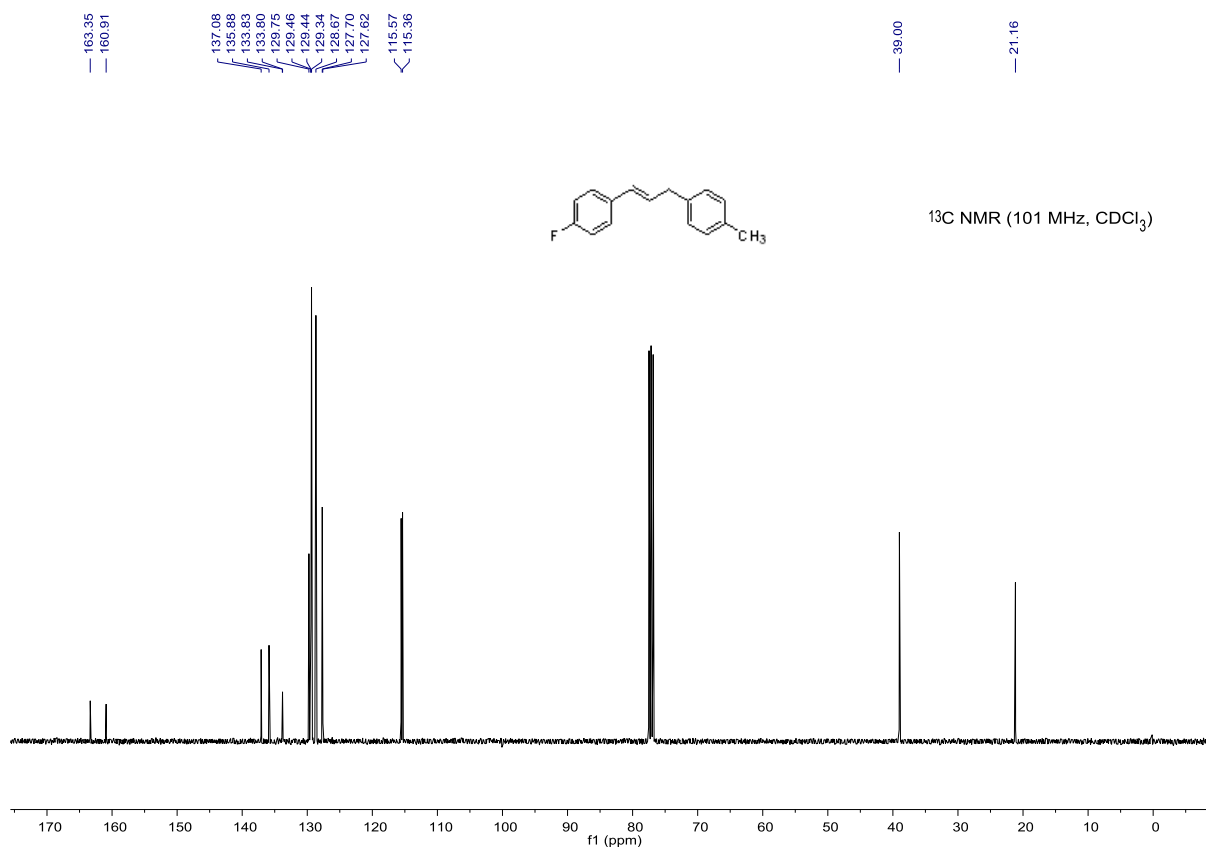



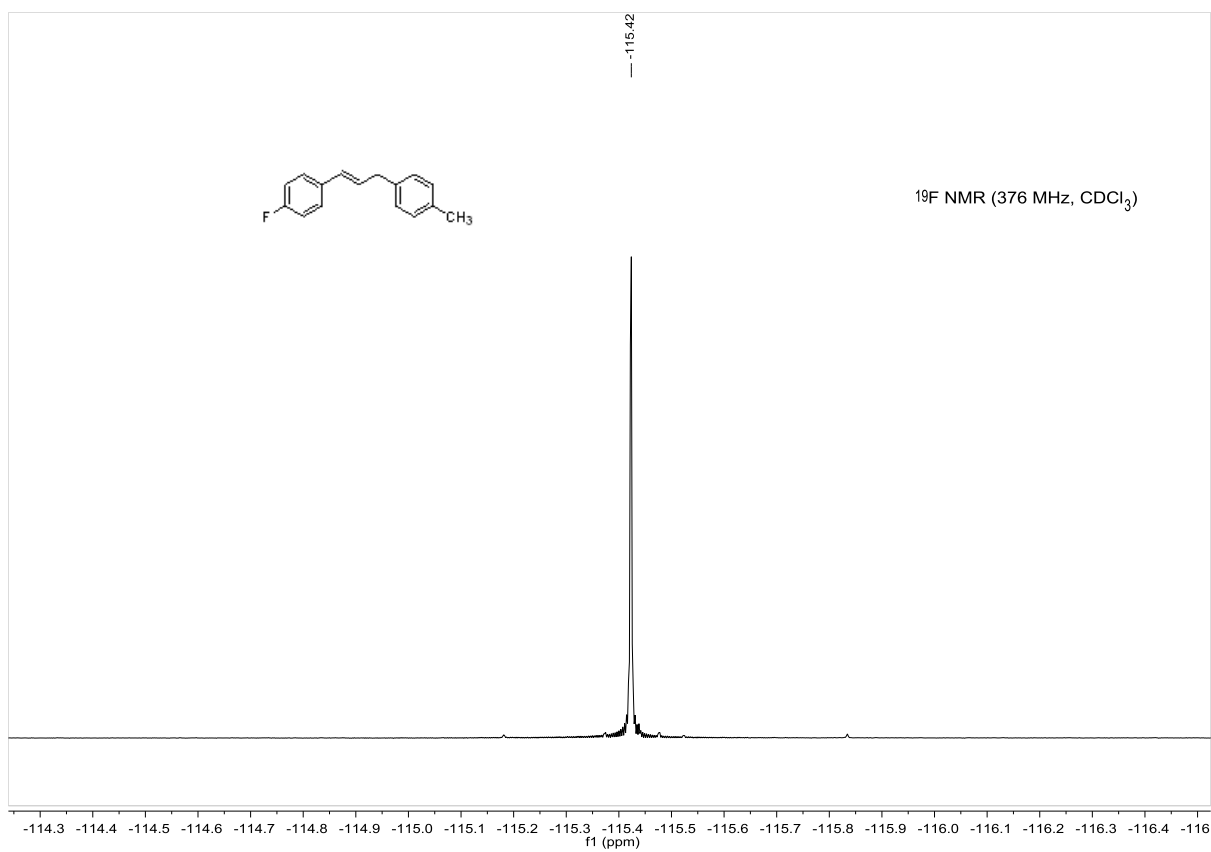

(29) (*E*)-1-fluoro-3-(3-(*p*-tolyl)prop-1-en-1-yl)benzene (**3bm**)

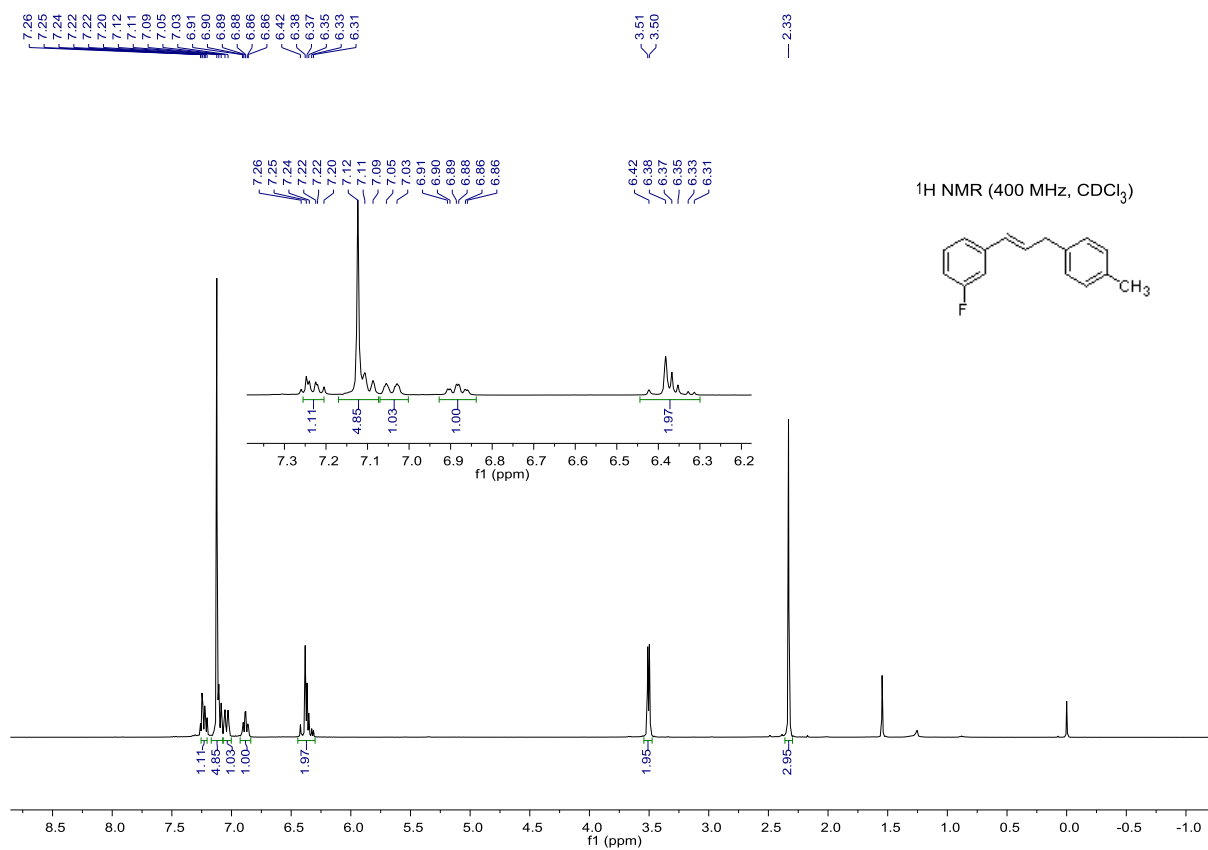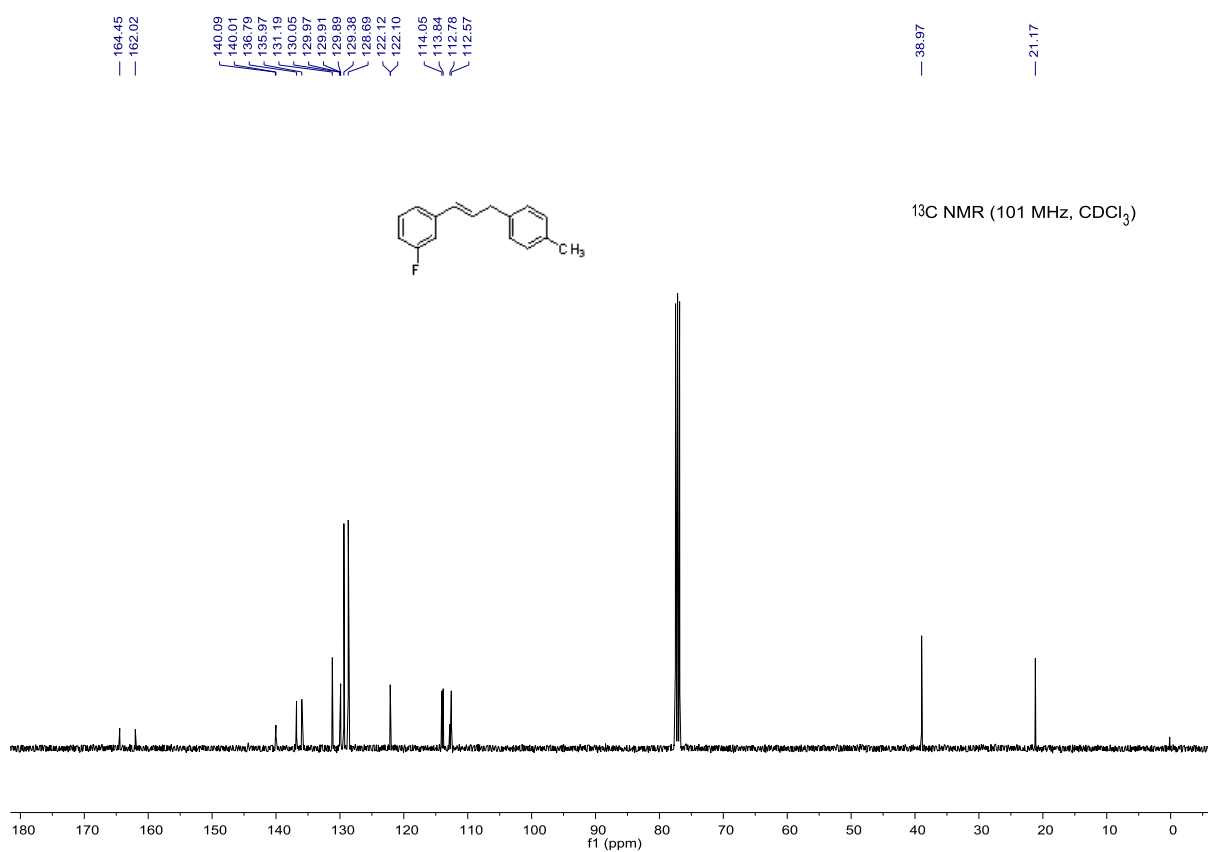

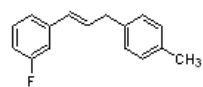

$^{19}\text{F}$  NMR (376 MHz,  $\text{CDCl}_3$ )

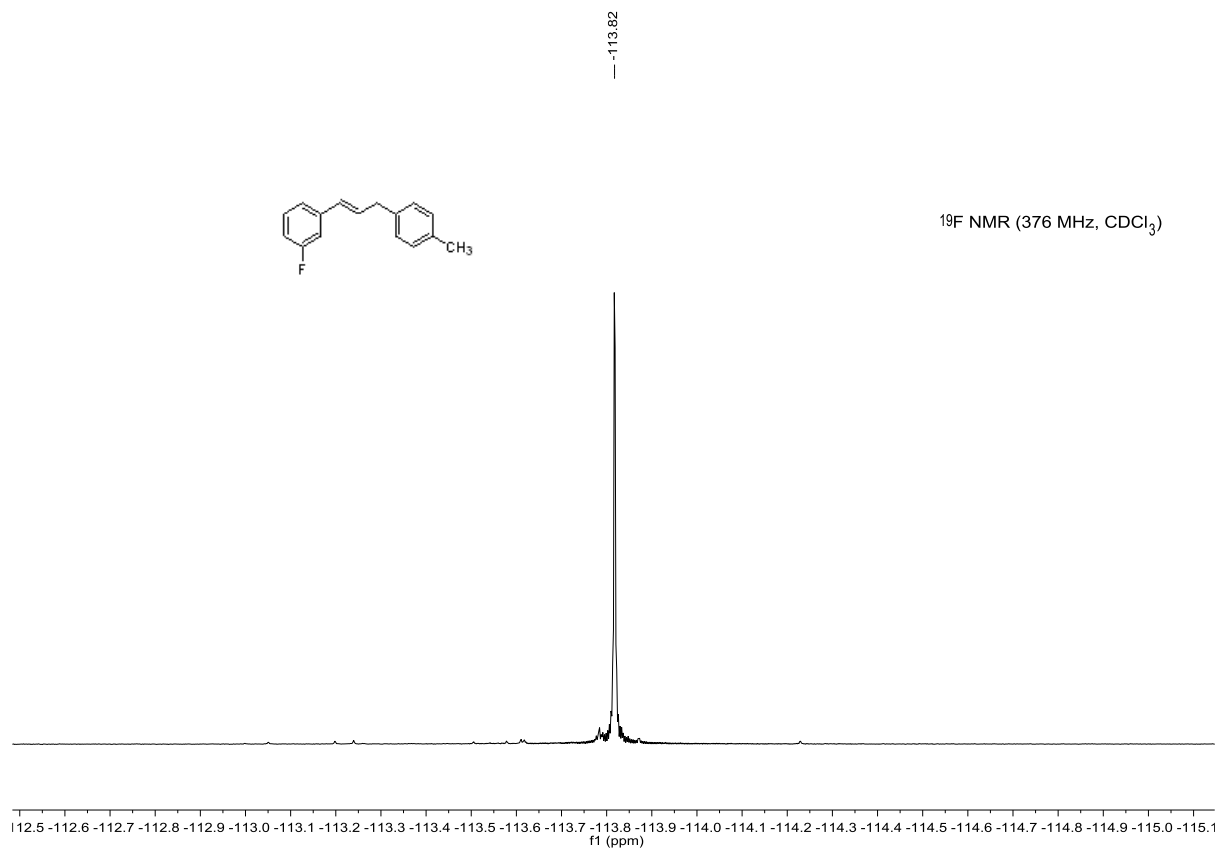

(30) (*E*)-1-methyl-4-(4-phenylbut-3-en-2-yl)benzene (**3bo**)

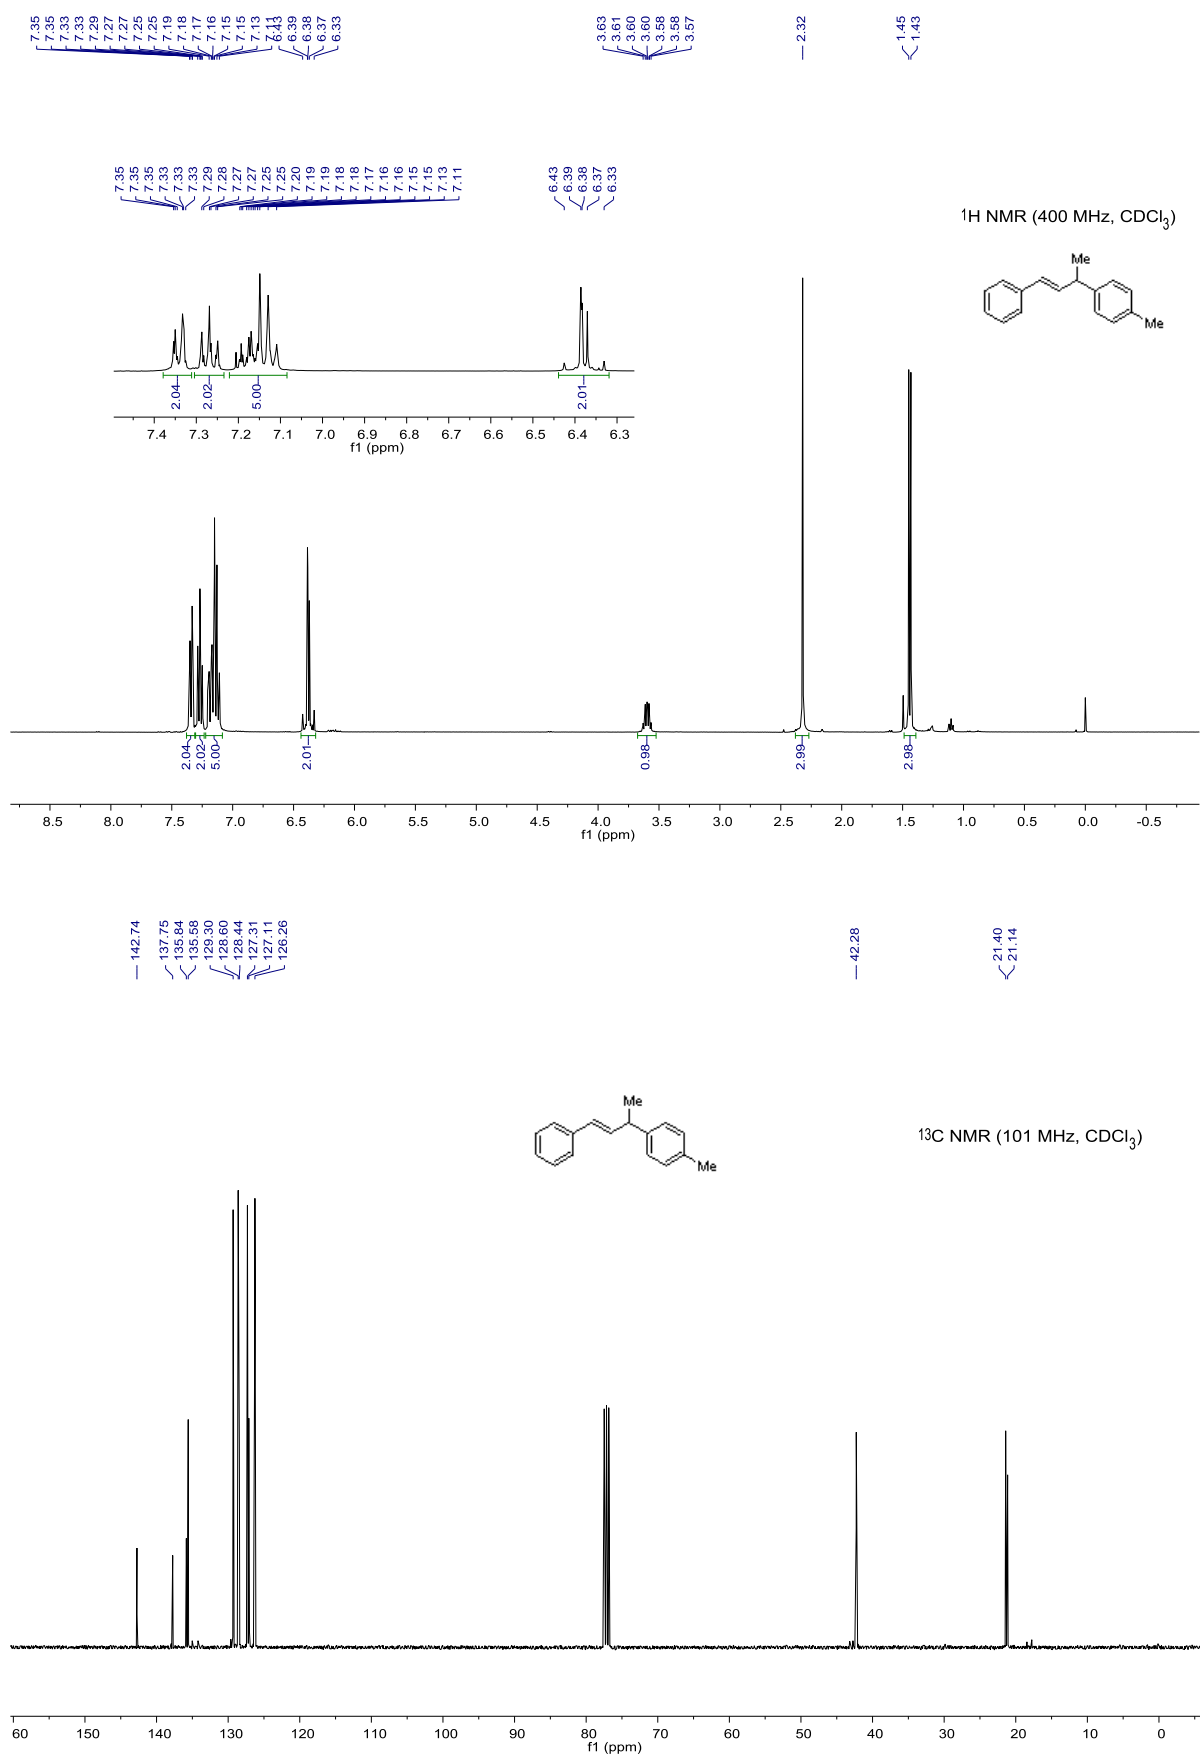

(31) methyl (*E*)-4-(3-(4-methoxyphenyl)prop-1-en-1-yl)benzoate (**4**)

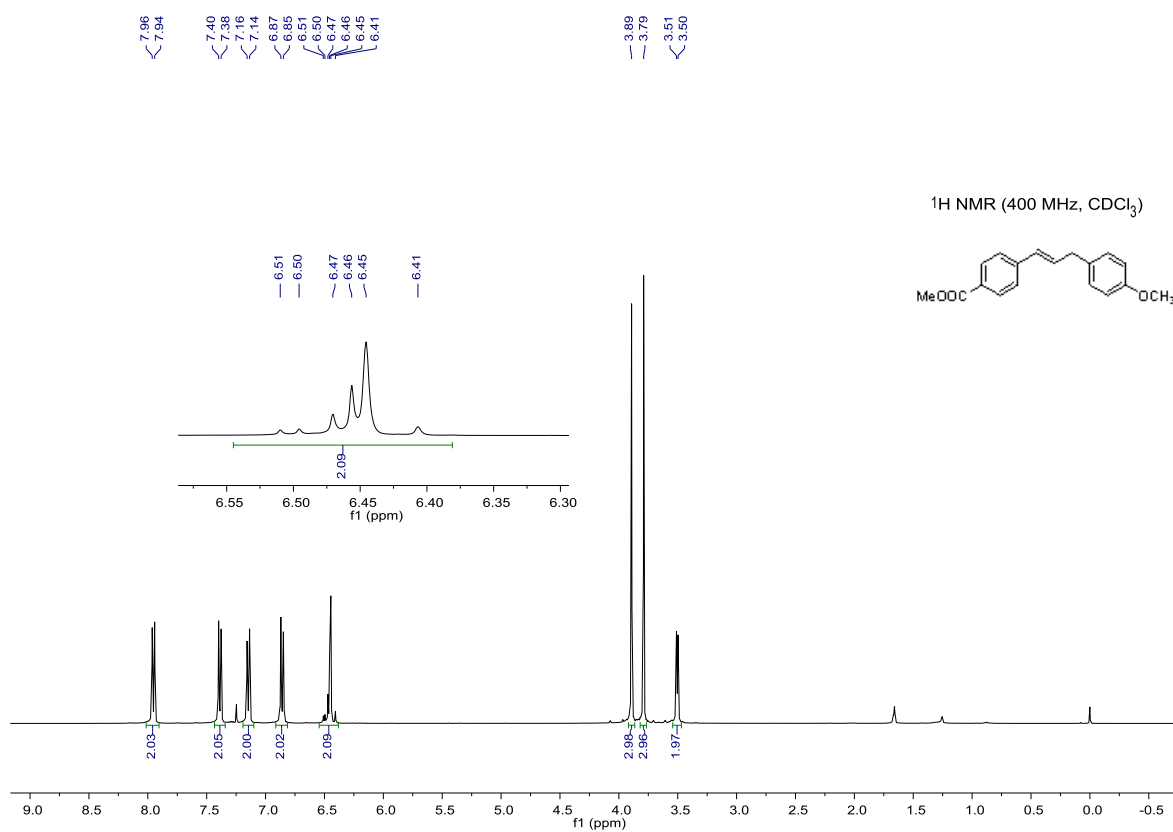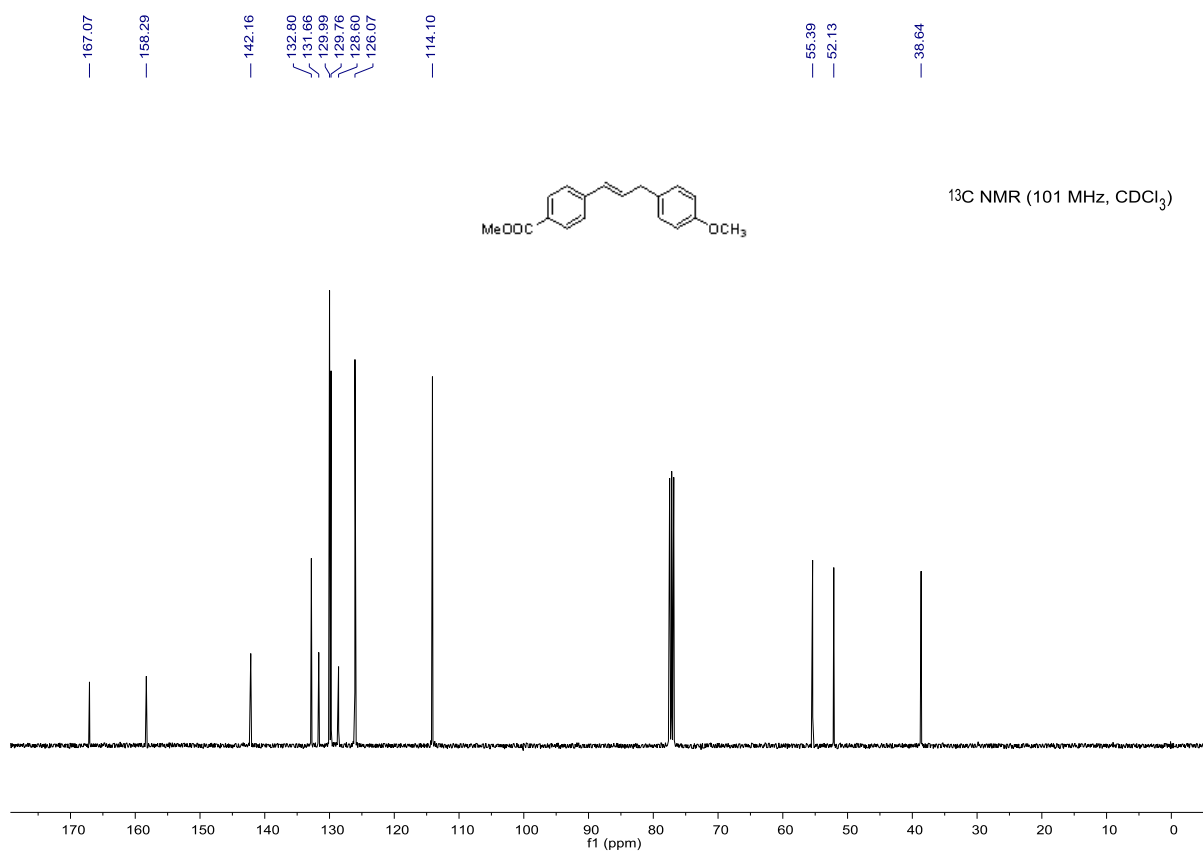

(32) 4-allyl-1,1'-biphenyl (**5a**)

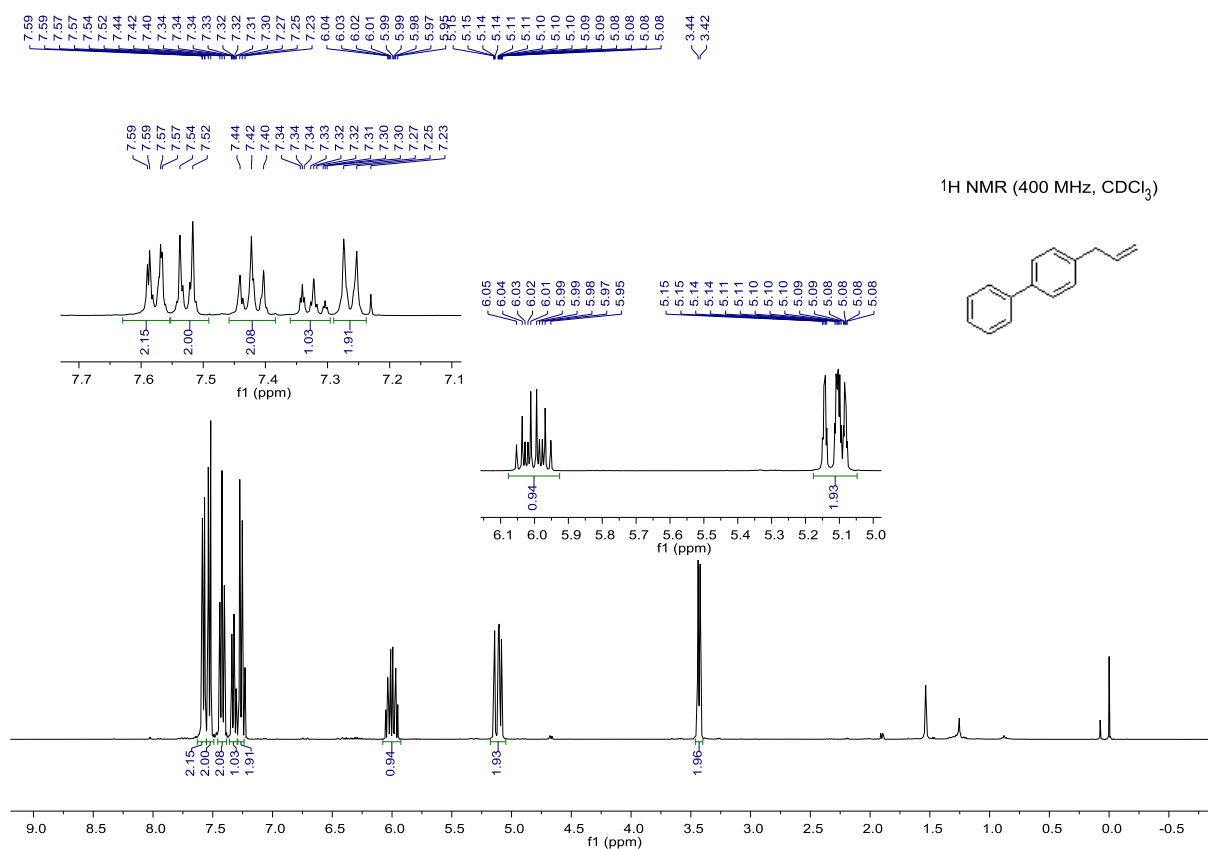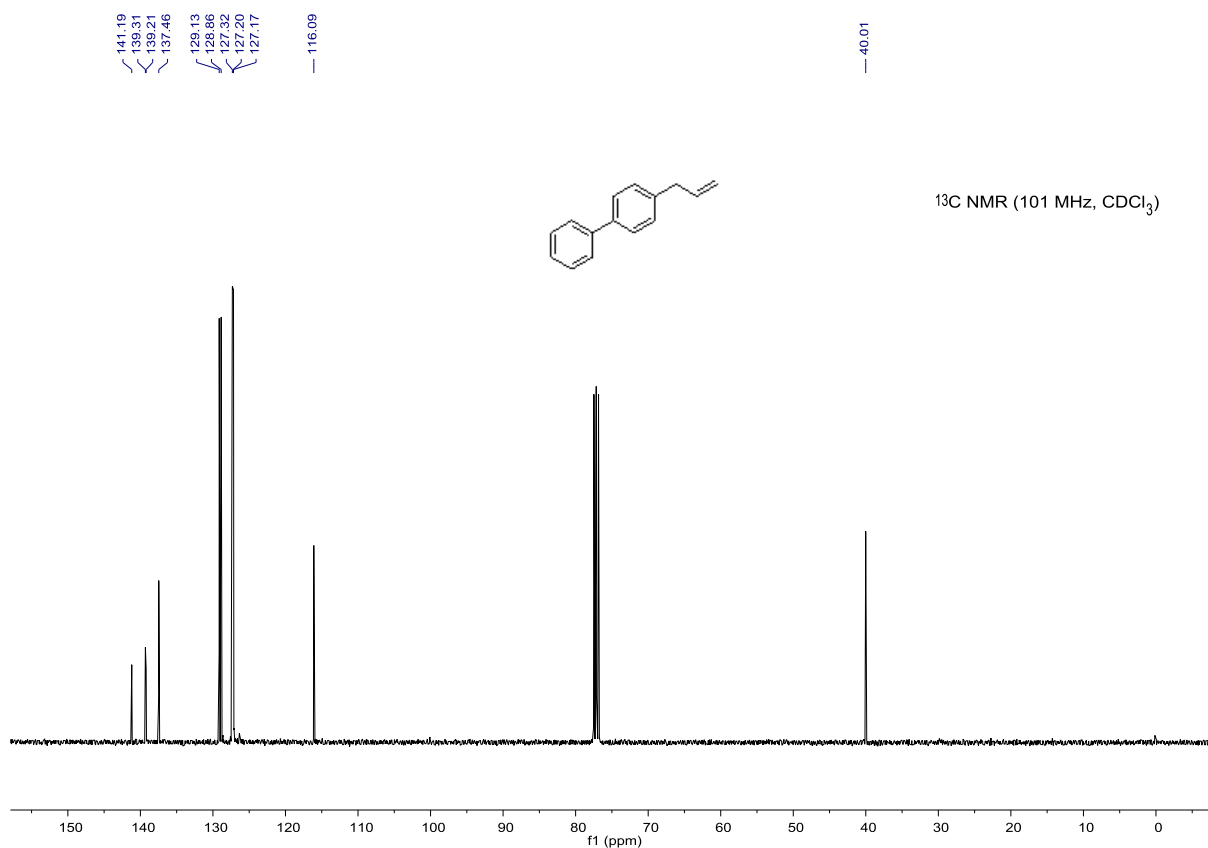

(33) (E)-4-(3-cyclohexylallyl)-1,1'-biphenyl (**5b**)

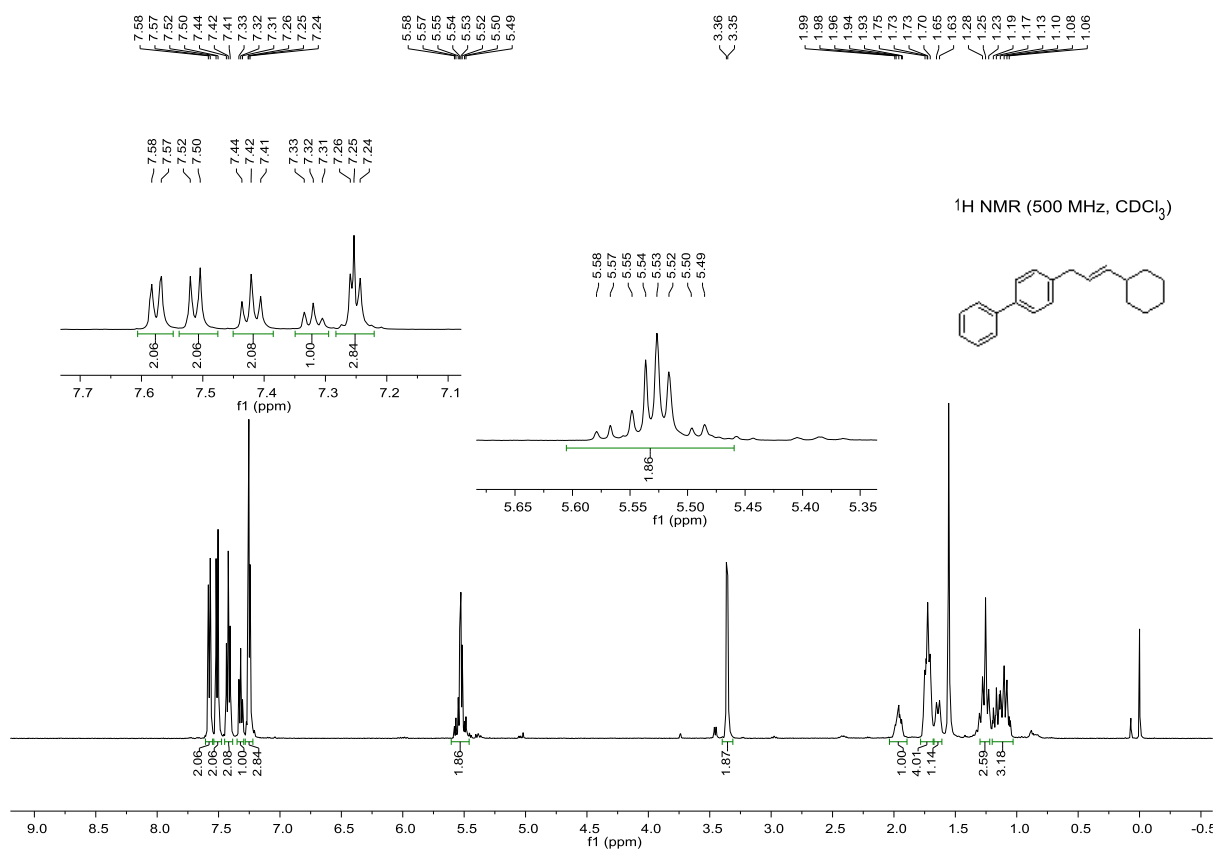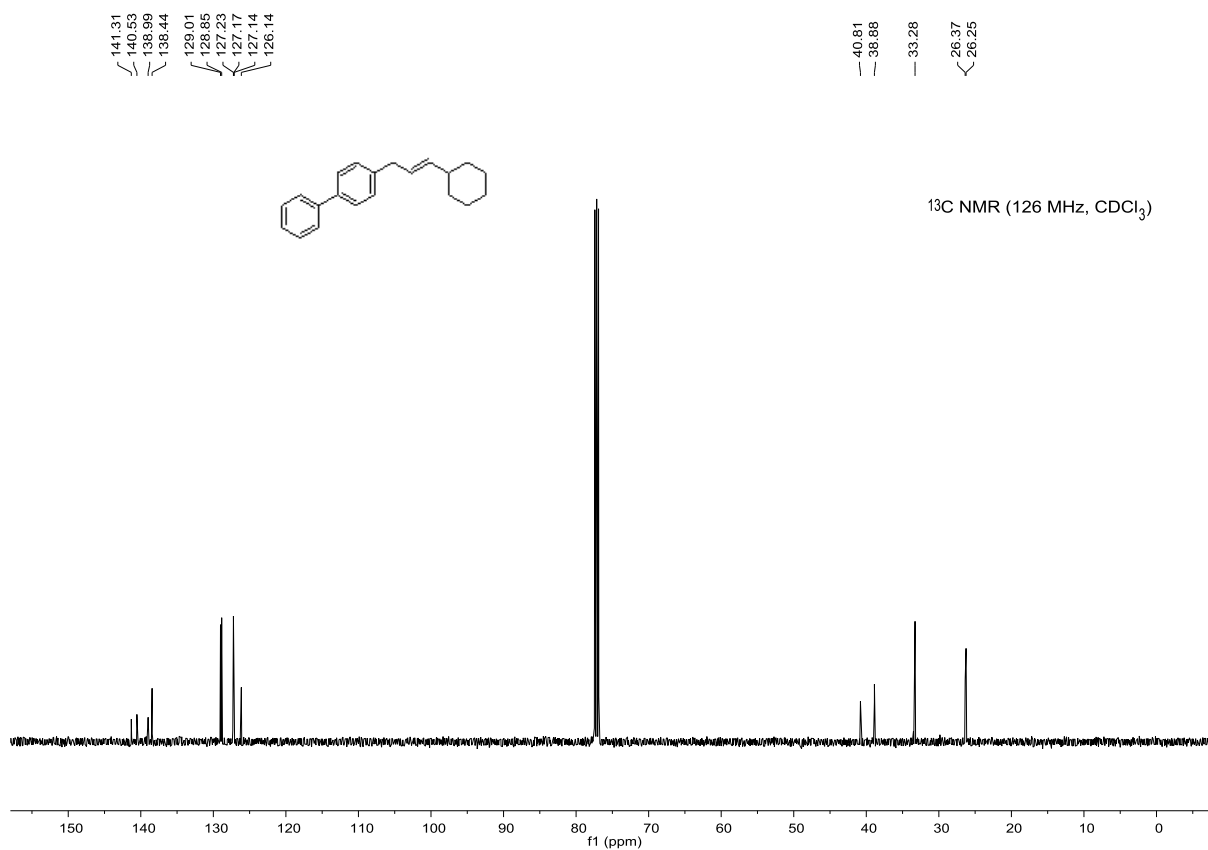

Supplement: d1ob01874d1.pdf [file d1ob01874d1.pdf]
